# Supplementary material for: Arachidonic acid released by PIK3CA mutant tumor cells triggers malignant transformation of colonic epithelium by inducing chromatin remodeling
Source: PubMed Central journal article supplement — Cell Rep Med. 2024 Apr 12;5(5):101510. doi: 10.1016/j.xcrm.2024.101510 (PMC11148513; doi:10.1016/j.xcrm.2024.101510), 2024-04-12
Supplement: mmc14.pdf [file mmc14.pdf]

# Arachidonic acid released by PIK3CA mutant tumor cells triggers malignant transformation of colonic epithelium by inducing chromatin remodeling

## Graphical abstract

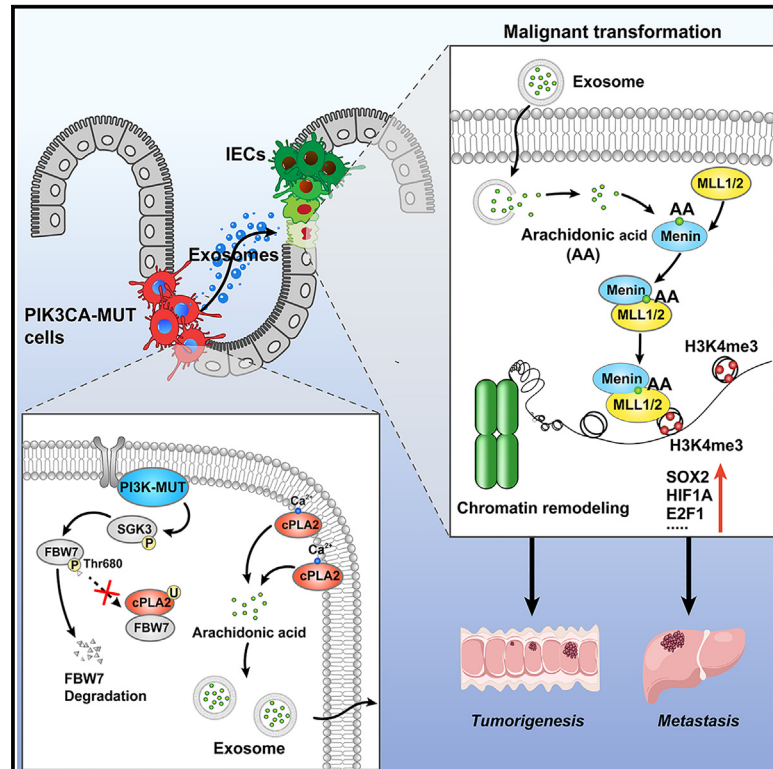

## Authors

Baoyu He, Qingli Bie, Rou Zhao, ..., Mingsheng Zhao, Huabao Xiong, Bin Zhang

## Correspondence

xionghbl@163.com (H.X.), zhangbin@mail.jnmc.edu.cn (B.Z.)

## In brief

How the tumor cells harboring key gene mutations affect the malignant transformation of intestinal epithelial cells (IECs) and its role in colorectal cancer progression have not been defined. We report that PIK3CA mutant tumor cells transmit oncogenic signals and trigger malignant transformation of recipient IECs via paracrine exosomal arachidonic acid (AA)-induced histone methylation modification. Mechanistically, AA directly binds Menin and modulates the integrity of Menin-MLL1/2 interactions, thus transactivating a wide range of cancer-related transcription factors.

## Highlights

- PIK3CA mutant tumor cells transform IECs into tumor cells and promote CRC progression
- PIK3CA mutations enhance SGK3-FBW7-mediated cPLA2 stability and AA biosynthesis
- AA directly binds with Menin and enhances H3K4 trimethylation in IECs
- Combination of alpelisib and VTP50469 is an effective treatment for PIK3CA mutant CRC

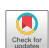

## Article

# Arachidonic acid released by PIK3CA mutant tumor cells triggers malignant transformation of colonic epithelium by inducing chromatin remodeling

Baoyu He,<sup>1,2,8</sup> Qingli Bie,<sup>1,2,8</sup> Rou Zhao,<sup>1</sup> Yugang Yan,<sup>3</sup> Guanjun Dong,<sup>4</sup> Baogui Zhang,<sup>5</sup> Sen Wang,<sup>1</sup> Wenrong Xu,<sup>6</sup> Dongxing Tian,<sup>1</sup> Yujun Hao,<sup>7</sup> Yanhua Zhang,<sup>7</sup> Mingsheng Zhao,<sup>4</sup> Huabao Xiong,<sup>4,\*</sup> and Bin Zhang<sup>1,9,\*</sup>

<sup>1</sup>Department of Laboratory Medicine, Affiliated Hospital of Jining Medical University, Jining Medical University, Jining, Shandong 272000, China

<sup>2</sup>School of Integrative Medicine, Shandong University of Traditional Chinese Medicine, Jinan, Shandong 250355, China

<sup>3</sup>School of Medical Engineering, Jining Medical University, Jining, Shandong 272067, China

<sup>4</sup>Institute of Immunology and Molecular Medicine, Jining Medical University, Jining, Shandong 272067, China

<sup>5</sup>Department of Gastrointestinal Surgery, Affiliated Hospital of Jining Medical University, Jining Medical University, Jining, Shandong 272000, China

<sup>6</sup>Key Laboratory of Laboratory Medicine of Jiangsu Province, School of Medicine, Jiangsu University, Zhenjiang, Jiangsu 212000, China

<sup>7</sup>State Key Laboratory of Oncogenes and Related Genes, Shanghai Cancer Institute, Renji Hospital, Shanghai Jiao Tong University School of Medicine, Shanghai 200032, China

<sup>8</sup>These authors contributed equally

<sup>9</sup>Lead contact

\*Correspondence: [xionghbl@163.com](mailto:xionghbl@163.com) (H.X.), [zhangbin@mail.jnmc.edu.cn](mailto:zhangbin@mail.jnmc.edu.cn) (B.Z.)

<https://doi.org/10.1016/j.xcrm.2024.101510>

## SUMMARY

Key gene mutations are essential for colorectal cancer (CRC) development; however, how the mutated tumor cells impact the surrounding normal cells to promote tumor progression has not been well defined. Here, we report that PIK3CA mutant tumor cells transmit oncogenic signals and result in malignant transformation of intestinal epithelial cells (IECs) via paracrine exosomal arachidonic acid (AA)-induced H3K4 trimethylation. Mechanistically, PIK3CA mutations sustain SGK3-FBW7-mediated stability of the cPLA2 protein, leading to the synthetic increase in AA, which is transported through exosome and accumulated in IECs. Transferred AA directly binds Menin and strengthens the interactions of Menin and MLL1/2 methyltransferase. Finally, the combination of VTP50469, an inhibitor of the Menin-MLL interaction, and alpelisib synergistically represses PDX tumors harboring PIK3CA mutations. Together, these findings unveil the metabolic link between PIK3CA mutant tumor cells and the IECs, highlighting AA as the potential target for the treatment of patients with CRC harboring PIK3CA mutations.

## INTRODUCTION

Colorectal cancer (CRC) develops through accumulation of multiple acquired genetic and epigenetic alterations, including DNA methylation, histone acetylation, and histone methylation, that induce malignant transformation of normal colonic epithelium to adenocarcinoma.<sup>1–3</sup> In the past decades, extensive efforts have been made to understand how tumor cells harboring key gene mutations affect their malignant cell behaviors.<sup>4–6</sup> However, it is still not clear whether there exists a possibility that mutated tumor cells can trigger surrounding normal cells to malignant transformation.

Tumor initiation and progression requires the metabolic reprogramming of cancer cells.<sup>7,8</sup> Unraveling the interplay between gene mutations and metabolic phenotype definitely plays a major role in understanding cancer pathogenesis and identifying novel therapeutic targets.<sup>9,10</sup> Key gene mutations always cause abnormalities in the synthesis of metabolites, including

asparagine,<sup>11</sup>  $\alpha$ -ketoglutarate,<sup>12</sup> and glutamine.<sup>13</sup> Evidence has suggested that metabolites modulated the redox balance, immune microenvironment, intestinal microecology, and pre-metastatic niche formation to support tumor growth.<sup>7</sup> However, the contributions of mutated tumor-cell-derived metabolites to the malignant transformation of normal cells is not yet understood.

Among all human cancers, PIK3CA is one of the most frequently mutated oncogenes, making it a prime target for cancer therapy.<sup>14</sup> Alpelisib, a selective PIK3CA inhibitor, has been approved for treating patients with breast cancer carrying PIK3CA mutations.<sup>15</sup> Our previous work demonstrated that alpelisib has shown a better tumor inhibitory effect in PIK3CA mutant xenograft tumor compared to the isogenic wild-type (WT) tumor.<sup>16</sup> However, early clinical trials have shown unsatisfactory responsiveness of alpelisib in the treatment of colon cancer containing PIK3CA mutations.<sup>17</sup> In light of the fact that alpelisib selectively targets PIK3CA mutant tumor cells, this implies that

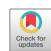

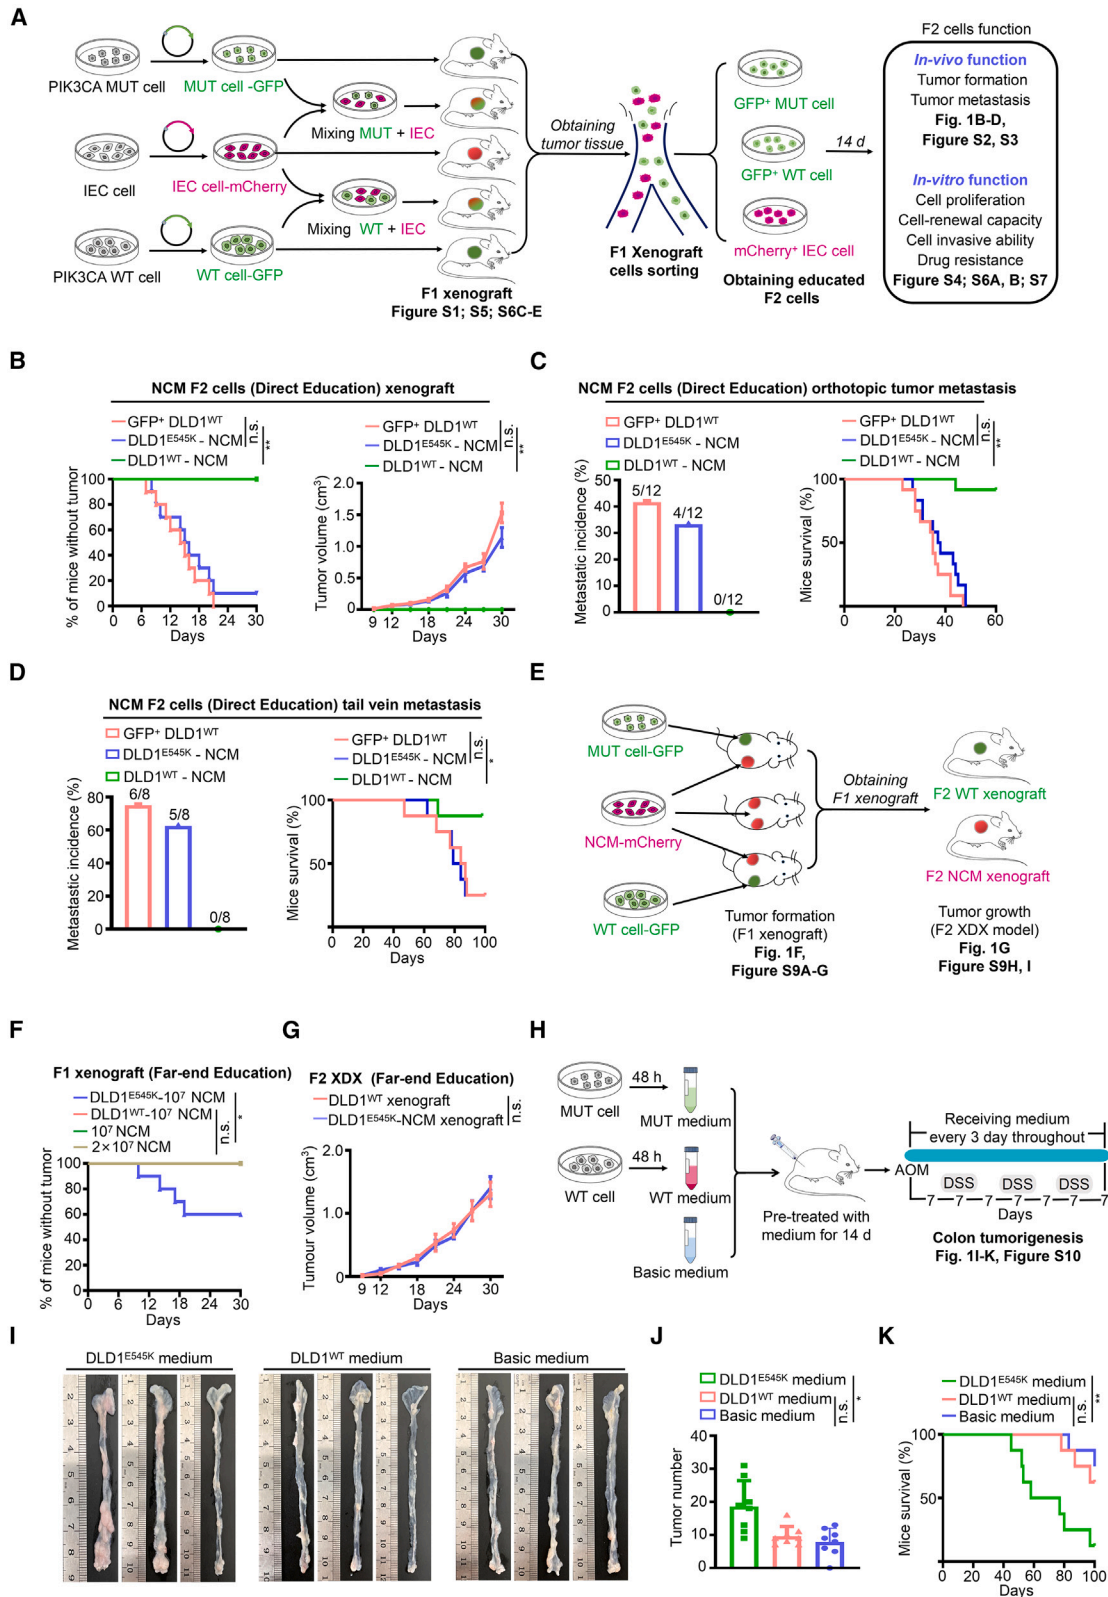

(legend on next page)

targeting mutated tumor cells alone may be insufficient for the treatment of colon cancer.

In the current study, we revealed that PIK3CA mutant tumor cells transmit exosomal AA to IECs and trigger H3K4 trimethylation, resulting in malignant transformation of IECs. This process plays an important role in the evolution of IECs toward tumor cells. Thus, our findings define a biological property of mutant tumor cells and the causal link between mutant tumor cells and malignant transformation of IECs, highlighting the inspiring prospect of blocking the transmission pathway of malignant signaling from PIK3CA mutant cells toward interacting IECs, thus breaking new ground for the targeted therapy of patients with tumors.

## RESULTS

### PIK3CA mutant tumor cells malignantly transform IECs into tumor cells and promote CRC progression

It is not clear how the PIK3CA mutated tumor cells impact the surrounding normal cells. To this end, we devised the direct education model as illustrated in Figure 1A. The results presented in Figures S1A–S1F demonstrate that xenograft tumors derived from a cell mixture of PIK3CA E545K tumor cells and NCM460 cells exhibited a higher incidence and more robust tumor growth rate compared to xenografts formed by a cell mixture of PIK3CA WT tumor cells and NCM460 cells, as well as the pure PIK3CA E545K or WT tumor cell groups. Notably, pure NCM460 cells failed to induce subcutaneous tumor formation. Furthermore, there was a significant presence of surviving NCM460 cells (red) in tumors derived from the cell mixture of PIK3CA mutant tumor cells and NCM460 cells, whereas only sporadic NCM460 cells (red) were detected in tumors derived from the cell mixture of WT tumor cells and NCM460 cells (Figure S1G). The findings suggest that PIK3CA mutant tumor cells may support the survival of NCM460 cells within xenograft tumors.

Next, we evaluated biological functions of educated NCM460 F2 cells *in vivo* and *in vitro*. We observed that PIK3CA E545K tumor-cell-educated NCM460 cells exhibited comparable tumorigenic capacity (Figure 1B) and metastatic potentiality (Figures 1C, 1D, S2, and S3) with cells isolated from xenografts of pure PIK3CA WT tumor cells (GFP<sup>+</sup> DLD1<sup>WT</sup> cells). Interestingly, PIK3CA WT tumor-cell-educated NCM460 cells failed to display neoplasm-forming capacity and metastatic phenotype (Figures 1B–1D, S2, and S3).

The results presented in Figure S4A demonstrate that PIK3CA E545K tumor-cell-educated NCM460 F2 cells exhibited significantly higher vitality, approaching the vitality levels of PIK3CA WT tumor cells. Malignant characteristics in epithelial cells are

often associated with epithelial-mesenchymal transition (EMT) and gene copy-number variation (CNV). Clearly, the expression levels of EMT characteristic markers in PIK3CA E545K tumor-cell-educated NCM460 F2 cells were similar to those in PIK3CA WT tumor cells (Figure S4B). Furthermore, PIK3CA E545K tumor-cell-educated NCM460 F2 cells exhibited a high frequency of CNV throughout the genome, indicating genomic instability in these cells (Figure S4C). To investigate whether NCM460 cells can reciprocally influence the malignancy of tumor cells, we isolated tumor cells from xenograft tumors formed by mixed cells. Remarkably, NCM460-educated PIK3CA mutant or WT cells displayed cell viability similar to that of PIK3CA mutant or WT tumor cells derived from pure xenograft tumors (Figures S4D and S4E), indicating minimal impact of NCM460 cells on tumor cells. Consistent results were obtained with the direct education model involving PIK3CA H1047R tumor cells and NCM460 cells (Figure S5). Moreover, we further validated the malignant transformation of human primary colonic epithelial (PCE) cells initiated by PIK3CA mutant tumor cells (Figures S6 and S7). Collectively, the results provide compelling evidence that PIK3CA mutant tumor cells possess the capacity to initiate the malignant transformation of normal colonic epithelial cells.

We next set out to determine whether the transformation of PIK3CA mutant tumor cells in IECs depends on direct physical contact. As presented in Figure 1E, we employed the far-end education model, which consisted of three groups. Our observations revealed that PIK3CA mutant tumor cells can remotely induce non-tumorigenic NCM460 cells to form visible neoplasms, while PIK3CA WT cells lack this capability (Figures 1F and S8A–S8D). Importantly, no PIK3CA mutant tumor cells were detectable in the neoplasms formed by NCM460 cells (Figure S8E). We also observed that heterozygous PIK3CA mutant tumor cells possess instigating capacity (Figures S8F and S8G). Furthermore, the NCM460 cells educated remotely by PIK3CA mutant tumor cells exhibited comparable tumorigenicity to PIK3CA WT tumor cells, as evidenced by the nearly identical tumor incidences and tumor growth curves (Figures 1G, S8H, and S8I).

The successful instigation of PIK3CA mutant tumor cells led us to speculate that these cells may transmit malignant signals to surrounding cells through paracrine mechanisms. As anticipated, NCM460 cells and PIK3CA WT tumor cells treated with conditioned medium derived from PIK3CA mutant cancer donor cells exhibited enhanced *in vitro* functions (Figure S9). This observation was further supported by the azoxymethane/dextran sodium sulfate (AOM/DSS)-induced colorectal tumorigenesis model (Figure 1H). Treatment with conditioned medium

### Figure 1. Animal models demonstrate that PIK3CA mutant cells trigger malignant transformation of colon epithelial cells

- (A) Workflow of the direct education model.  
 (B) Tumor incidence (left) and tumor volume (right) of subcutaneous xenografts established by NCM460 F2 cells (mean  $\pm$  SEM,  $n = 10$ ).  
 (C) Metastatic incidence (left) and survival (right) of mice bearing colon orthotopic tumors established by NCM460 F2 cells (mean  $\pm$  SEM,  $n = 12$ ).  
 (D) Metastatic incidence (left) and survival (right) of mice from the tail vein metastasis model established by NCM460 F2 cells ( $n = 8$ ).  
 (E) Workflow of the far-end education model.  
 (F) Tumor incidence of NCM460 F1 xenografts ( $n = 10$ ). The plotted lines of DLD1<sup>WT</sup>-10<sup>7</sup> NCM group, 10<sup>7</sup> NCM group, and 2  $\times$  10<sup>7</sup> NCM group overlapped.  
 (G) Tumor volume of NCM460 F2 tumors established using the indicated F1 xenografts (mean  $\pm$  SEM,  $n = 10$ ).  
 (H–K) Workflow (H) and representative macroscopic colon images (I), tumor counts (J), and survival (K) of mice (mean  $\pm$  SEM,  $n = 8$ ).  
 Statistical analyses, n.s., not significant; \* $p < 0.05$ ; \*\* $p < 0.01$ .

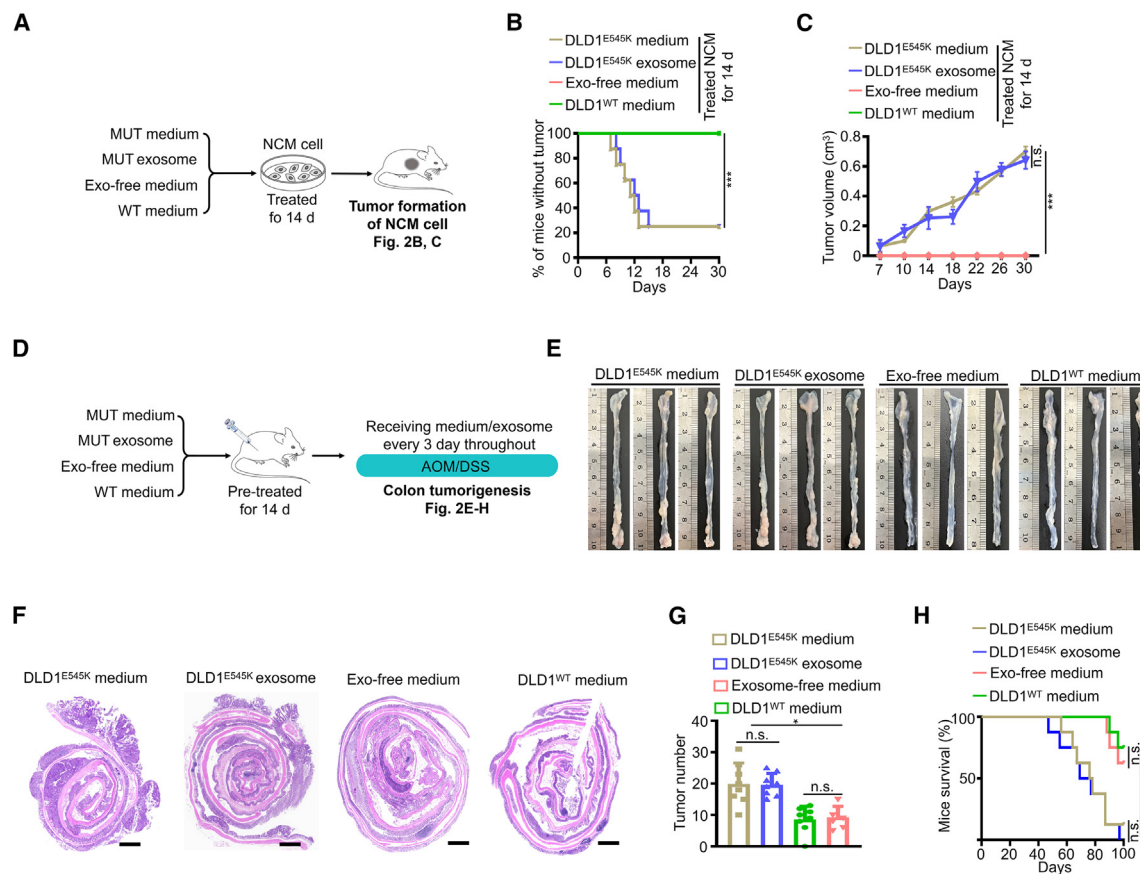

**Figure 2. Exosome components serve as key mediators transmitting gene mutation signals**

(A–C) Workflow (A), tumor incidence (B), and tumor volume (C, mean  $\pm$  SEM) of NCM460 xenografts pre-treated with the indicated medium or exosomes ( $n = 8$ ). The plotted lines of exosome-free medium group and DLD1<sup>WT</sup> medium group overlapped.

(D–H) Workflow (D) and representative macroscopic colon images (E), H&E staining (F), tumor counts (G, mean  $\pm$  SEM), and survival (H) of mice ( $n = 8$ ). Scale bars in (F), 1,000  $\mu$ m.

Statistical analyses, n.s., not significant; \* $p < 0.05$ ; \*\* $p < 0.01$ ; \*\*\* $p < 0.001$ .

from PIK3CA E545K tumor cells significantly promoted AOM/DSS-induced colorectal tumorigenesis, as evidenced by colon histology, tumor numbers, and mouse survival (Figures 11–1K and S10). Collectively, the findings indicate that PIK3CA mutant tumor cells transmit malignant signals and initiate the malignant transformation of IECs through paracrine mechanisms.

### Exosome components serve as key mediators undertaking the transmission of oncogenic mutation signals

The paracrine composition in the cell-culture supernatant primarily consists of soluble cytokines and extracellular vesicles (EVs), with exosomes being the predominant type of EVs.<sup>18</sup> Initially, we isolated and validated exosomes derived from PIK3CA mutant tumor cells and WT tumor cells (Figures S11A–S11C). Interestingly, exosome components and conditioned medium derived from PIK3CA mutant tumor cells exhibited a comparable efficiency in enhancing cell viability of NCM460 recipient cells; when we depleted exosomes, the instigative ability of conditioned medium was completely abolished (Figures S12A and S12B), supporting the possibility that exosome

components are responsible for the transfer of malignant signals from PIK3CA mutant tumor cells.

To further confirm this notion, we conducted *in vivo* experiments (Figure 2A). Consistently, both conditioned medium and exosome components derived from PIK3CA mutant tumor cells induced a tumorigenic phenotype in NCM460 recipient cells, as evidenced by the formation of visible neoplasms (Figures 2B and 2C). Treatment with conditioned medium or exosome components from PIK3CA mutant tumor cells significantly exacerbated AOM/DSS-induced colorectal tumorigenesis (Figures 2D–2H). The findings strongly validate the crucial role of exosome components as mediators in the transmission of oncogenic signals associated with PIK3CA mutations.

### Exosome-mediated AA serves as a key mediator in transmitting PIK3CA mutant signals

In our initial observations, we did not find any significant differences in the average size distribution and density of exosomes released by PIK3CA mutant and WT tumor cells (Figure S13A). This led us to hypothesize that the altered composition of exosomes might play a role in the intercellular transfer of malignant

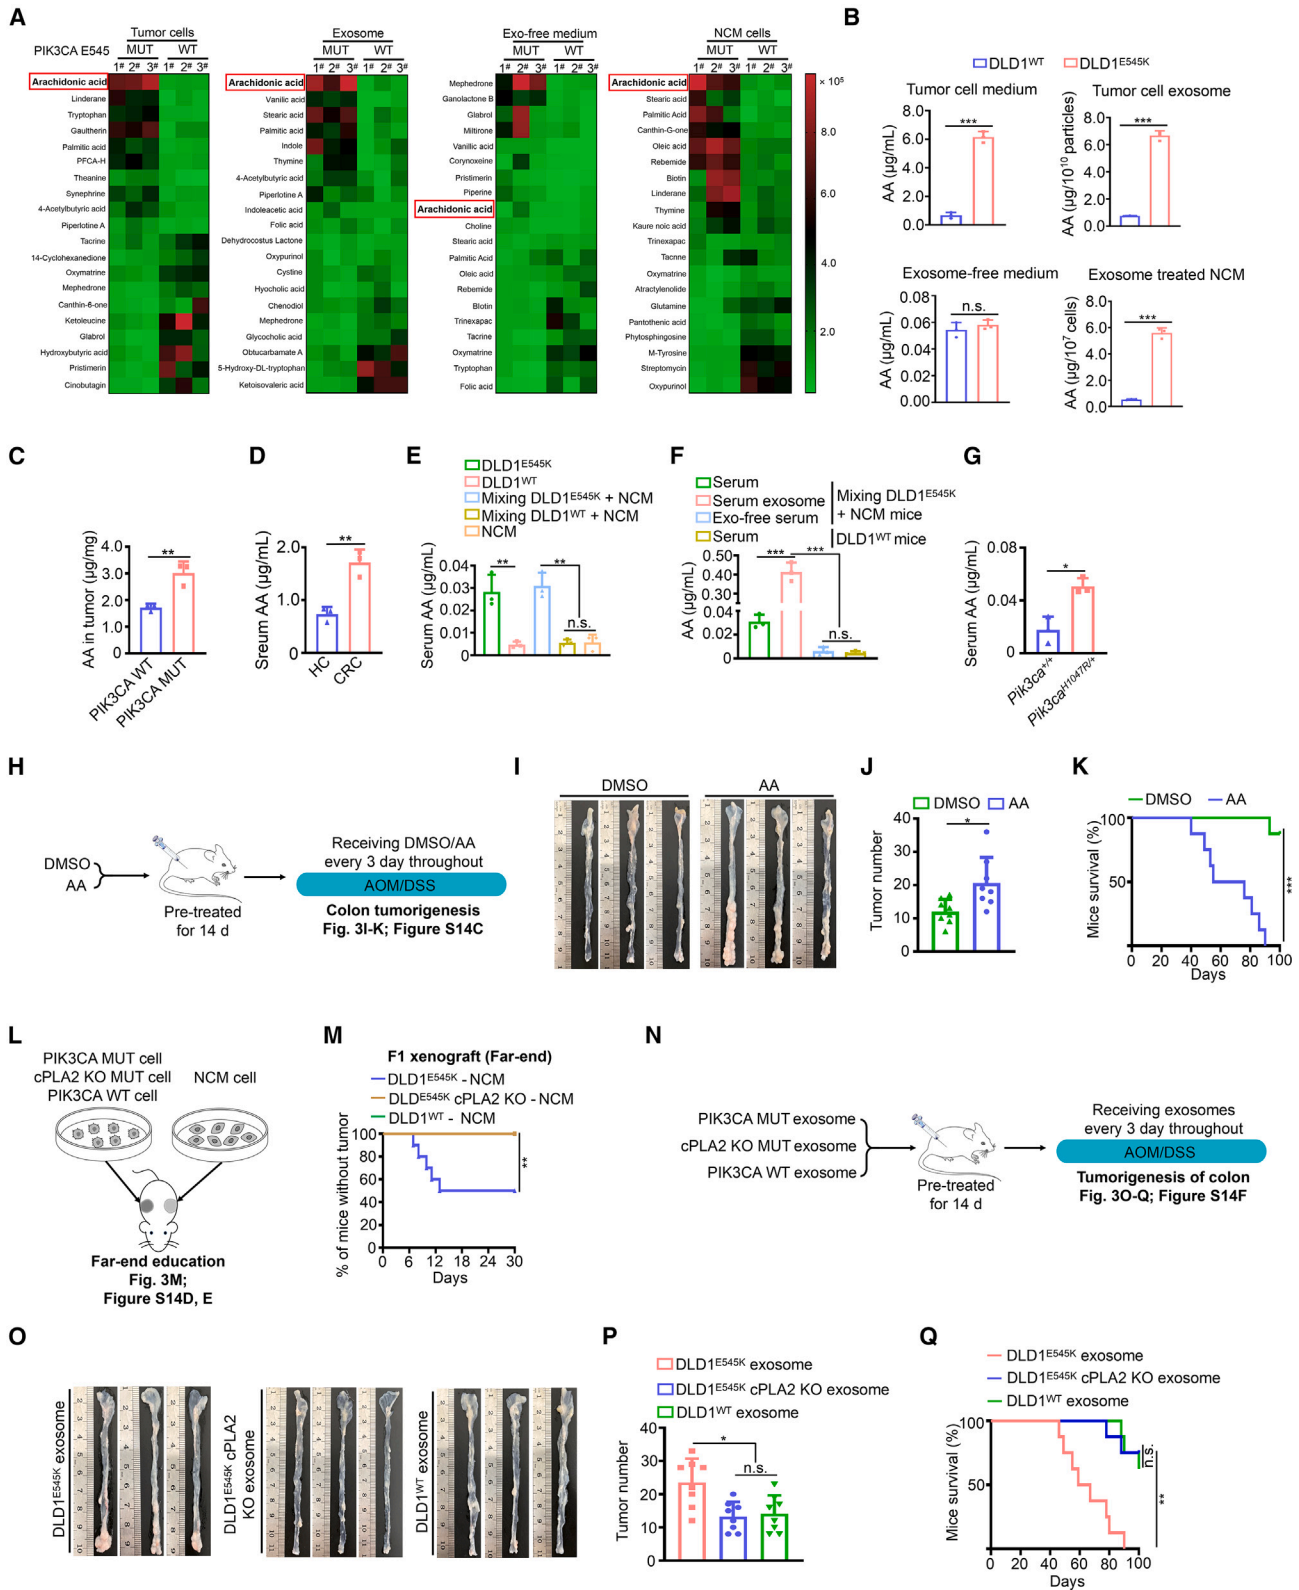

(legend on next page)

signals. Exosomes are known to contain a diverse range of contents, including growth factors, proteins, lipids, nucleic acids, non-coding RNAs, and metabolites.<sup>19</sup> To identify the specific content responsible for transmitting oncogenic signals, we treated NCM460 cells with exosomes that had undergone enzymatic digestion using DNase I, RNAase, or protease K and then evaluated cell viability. Surprisingly, the removal of DNA, RNA, or protein from the exosomes did not affect the transmission of malignant signals (Figures S13B–S13D). The findings suggest that the targeted exosomal contents may not be responsible for transmitting the oncogenic signals released from PIK3CA mutant tumor cells.

Metabolic signatures play a crucial role in determining cell-fate transitions and can significantly affect cell behaviors.<sup>20,21</sup> Given the striking oncogenic phenotype and tumorigenicity observed in educated IECs, we propose that the metabolites hidden in exosomes may control the transmission of malignant signals. To explore this hypothesis, we conducted an untargeted metabolomics analysis to examine the differences in metabolite composition. Notably, AA emerged as the most significantly up-regulated metabolite among the differential metabolites in PIK3CA mutant donor cells, exosome components, and NCM460 recipient cells compared to their respective controls (Figures 3A and 3B). Interestingly, there was minimal disparity in AA levels between exosome-depleted medium from PIK3CA mutant cells and PIK3CA WT cells (Figures 3A, 3B, S14A, and S14B; Table S1). The findings led us to speculate that PIK3CA mutant cells are likely to transport AA to IECs via exosomes, thereby facilitating the transmission of malignant signals. To further substantiate our hypothesis, we quantify AA in five groups: (1) AA levels were significantly elevated in tumor tissues with PIK3CA mutations compared to PIK3CA WT tumors (Figure 3C); (2) sera from patients with CRC exhibited markedly higher levels of AA compared to healthy controls (Figure 3D); (3) sera from mice bearing PIK3CA mutant xenograft tumors displayed increased levels of AA (Figure 3E); (4) serum exosome components exhibited observable increases in AA levels compared to the exosome-depleted counterpart in the direct education model (Figure 3F); and (5) elevated levels of AA were observed in the serum of mice harboring the *Pik3ca*<sup>H1047R/+</sup> mutation (Figure 3G). Consequently, the measurement and comparison of AA in the aforementioned experimental models consistently support the notion that AA may serve as a key mediator in the transmission of malignant signals.

We next presented five lines of evidence to validate the pivotal role of AA in transmitting malignant signals of PIK3CA mutant tu-

mor cells toward IECs: (1) AA significantly enhanced AOM/DSS-induced colorectal tumorigenesis (Figures 3H–3K and S14C); (2) PIK3CA mutant tumor cells with cytosolic phospholipases knockout (cPLA2 KO) failed to remotely induce the tumorigenic phenotype in NCM460 cells (Figures 3L, 3M, S14D, and S14E); (3) exosome components from PIK3CA mutant tumor cells with cPLA2 KO attenuated tumorigenicity (Figures 3N–3Q and S14F); (4) AA conferred a similar capacity to the conditioned medium from PIK3CA WT tumor cells, comparable to its PIK3CA mutant counterpart, in enhancing NCM460 cell viability (Figures S15A–S15F); and (5) knockdown or KO of cPLA2, the synthetic enzyme for AA, significantly reduced AA levels in PIK3CA mutant tumor cells and disrupted their induction of malignant biological behaviors in NCM460 cells (Figures S15G–S15L). Overall, the data strongly support the notion that exosome-mediated AA serves as the key mediator responsible for transmitting PIK3CA mutant signals.

### The PI3K-PDK1-SGK3 axis regulates cPLA2 protein stability by promoting FBW7 T680 phosphorylation, thereby enhancing AA biosynthesis

We next aimed to shed light on the mechanism by which PIK3CA mutant cells harbor elevated AA. We observed that cPLA2, the primary supplier of AA, exhibited significantly increased phosphorylation and total protein levels in the presence of the PIK3CA mutation, while the expression of *PLA2G4A*, the gene encoding cPLA2, remained unchanged (Figures 4A and S16A). Interestingly, we noticed a discrepancy in the alteration of cPLA2's phosphorylation and total protein levels. Specifically, there was a 7- to 8-fold increase in total protein, whereas only a 3- to 4-fold increase in phosphorylation levels of cPLA2 was associated with the PIK3CA mutation (Figure 4A). We thus speculate that PIK3CA mutation may mainly be involved in the regulation of cPLA2 protein stability. Consistent with this hypothesis, we observed significant increases in protein stability and attenuated K48-linked ubiquitination of cPLA2 in the presence of the PIK3CA mutation (Figures 4B, 4C, and S16B). Treatment of cells with the proteasome inhibitor MG132 increased cPLA2 stabilization, supporting the ubiquitin-proteasome degradation pattern of cPLA2 (Figure S16C). Additionally, the PIK3CA mutation had minimal impact on K27-linked or K63-linked ubiquitination of cPLA2 (Figures S16D and S16E).

We then proceeded to elucidate the molecular mechanisms by which the PIK3CA mutation modulates cPLA2 ubiquitination and stability. We employed an unbiased approach to identify

### Figure 3. Exosome-mediated AA undertaking transmission of the oncogenic mutation signals

- (A) Heatmaps displaying top 20 differential metabolites (10 upregulated and 10 downregulated) in the indicated groups ( $n = 3$ ).  
 (B) Quantitative abundance of AA in the indicated groups (mean  $\pm$  SEM,  $n = 3$ ).  
 (C) Quantitative abundance of AA in CRC tissues harboring WT or E545K mutant PIK3CA (mean  $\pm$  SEM,  $n = 3$ ).  
 (D) Quantitative abundance of serological AA in patient with CRC and healthy control subjects (mean  $\pm$  SEM,  $n = 3$ ).  
 (E) Quantitative abundance of serological AA in mice bearing indicated xenografts (mean  $\pm$  SEM,  $n = 3$ ).  
 (F) Quantitative abundance of AA in the indicated groups (mean  $\pm$  SEM,  $n = 3$ ).  
 (G) Quantitative abundance of serological AA in *Pik3ca*<sup>H1047R/+</sup> and *Pik3ca*<sup>+/+</sup> mice (mean  $\pm$  SEM,  $n = 3$ ).  
 (H–K) Workflow (H) and representative macroscopic colon images (I), tumor counts (J, mean  $\pm$  SEM), and survival (K) of mice ( $n = 8$ ).  
 (L and M) Workflow (L) and tumor incidence of NCM460 F1 xenografts from the far-end education model (M,  $n = 10$ ). The plotted lines of the DLD1<sup>E545K</sup> cPLA2 KO-NCM group and the DLD1<sup>WT</sup>-NCM group overlapped.  
 (N–Q) Workflow (N) and representative macroscopic colon images (O), tumor counts (P, mean  $\pm$  SEM), and survival (Q) of mice ( $n = 8$ ).  
 Statistical analyses, n.s., not significant; \* $p < 0.05$ ; \*\* $p < 0.01$ ; \*\*\* $p < 0.001$ .

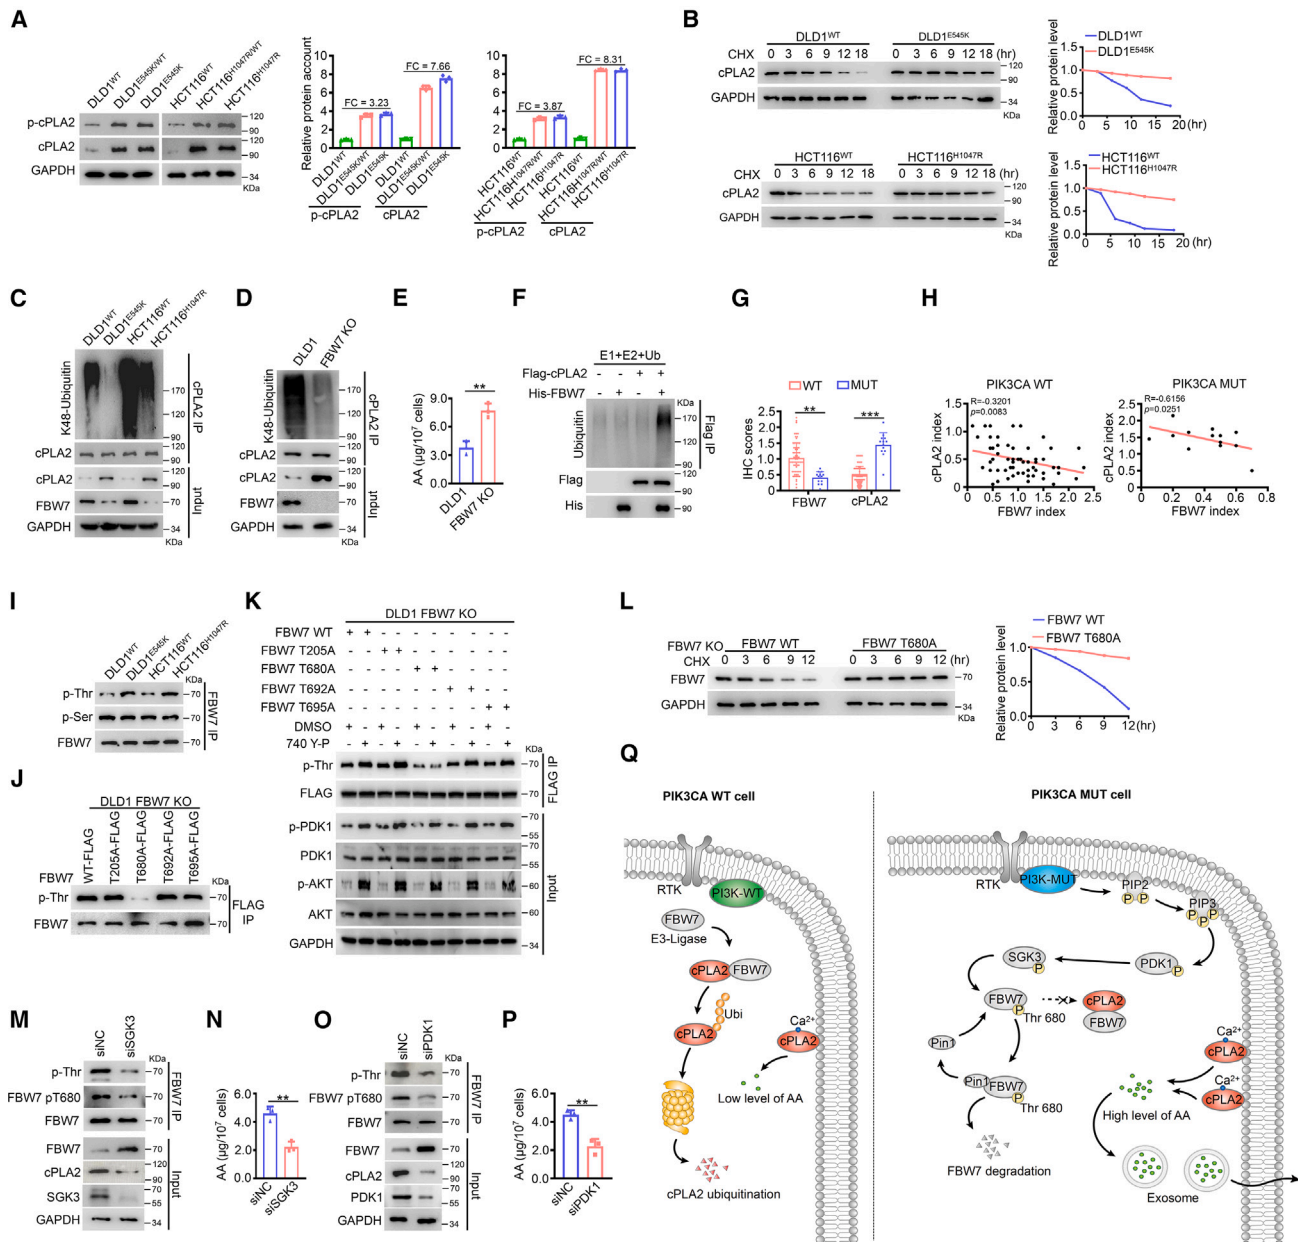

**Figure 4. Elucidating the molecular mechanisms of PIK3CA mutation modulating cPLA2 stability and AA biosynthesis**

(A) Phosphorylated and total protein levels of cPLA2 in PIK3CA mutant and isogenic WT cells. Band intensity was quantified using ImageJ (mean  $\pm$  SEM,  $n = 3$ ).  
 (B) cPLA2 protein abundance was measured in indicated cells treated with 50  $\mu$ M cycloheximide (CHX) for the indicated times.  
 (C) K48-linked ubiquitination of cPLA2 was measured in indicated cells.  
 (D) K48-linked ubiquitination of cPLA2 was measured in indicated cells.  
 (E) Quantitative abundance of AA in the indicated groups (mean  $\pm$  SEM,  $n = 3$ ).  
 (F) *In vitro* cPLA2 ubiquitination.  
 (G) Statistical analysis of FBW7 and cPLA2 expression levels in PIK3CA WT CRC tissues ( $n = 67$ ) and PIK3CA mutant CRC tissues ( $n = 13$ ). Data are presented as mean  $\pm$  SEM.  
 (H) Evaluation of correlations between FBW7 and cPLA2 expression in PIK3CA WT CRC tissues ( $n = 67$ , left) and PIK3CA mutant CRC tissues ( $n = 13$ , right).  
 (I) Total serine (Ser)-linked phosphorylation and threonine (Thr)-linked phosphorylation of FBW7 were evaluated in the indicated cells.  
 (J) FLAG-tagged FBW7 WT or indicated mutant constructs were transfected into FBW7 KO cells. Cell lysates were immunoprecipitated with anti-FLAG agarose and blotted with the indicated antibodies.  
 (K) FLAG-tagged FBW7 WT or indicated mutant constructs were transfected into FBW7 KO cells, followed by treatment with DMSO or 20  $\mu$ M 740 Y-P. Cell lysates were immunoprecipitated with anti-FLAG agarose beads and blotted with the indicated antibodies.  
 (L) FLAG-tagged FBW7 WT or T680A mutant constructs were transfected into FBW7 KO cells. FBW7 protein abundance was measured.

(legend continued on next page)



intracellular cPLA2-binding factors in PIK3CA mutant and WT tumor cells. Interestingly, among the potential cPLA2-binding proteins, only E3 ligase, F box, and WD repeat domain-containing 7 (FBW7) exhibited weaker interaction with cPLA2 in PIK3CA mutant tumor cells (Figure S16F and Table S2). Consistently, FBW7 physically interacted with less cPLA2 in PIK3CA mutant cells (Figure S16G). KO of FBW7 indeed resulted in reduced cPLA2 ubiquitination and a concomitant increase in cPLA2 total protein and AA levels (Figures 4D and 4E). To further prove that FBW7 is an E3 ubiquitin ligase of cPLA2, we performed *in vitro* ubiquitination assays and observed that FBW7 can directly ubiquitinate cPLA2 (Figure 4F).

In addition, FBW7 knockdown enhanced the instigative ability of PIK3CA WT cells upon NCM460 cells (Figures S16H and S16I). Moreover, the expression patterns and prognostic indications of FBW7 and cPLA2 exhibited opposite trends in PIK3CA mutant and WT tumor tissues (Figures 4G and S16J). As a tumor suppressor, low levels of FBW7 predicted a worse prognosis, whereas increased levels of the oncoprotein cPLA2 indicated an unfavorable prognosis (Figures S16K and S16L). Furthermore, we observed significant negative correlations between FBW7 and cPLA2 protein levels in both PIK3CA mutant and WT tumor tissues, with a stronger correlation in the PIK3CA mutant group (Figure 4H).

Notably, the FBW7 mRNA level was barely affected (Figure S17A), despite the significant downregulation of protein abundance observed with PIK3CA mutations (Figure 4C). Previous reports indicated that FBW7 undergoes degradation dependent on phosphorylation.<sup>22</sup> Thus, we formulated the hypothesis that PIK3CA mutation might trigger phosphorylation-mediated self-degradation of FBW7. To investigate this, we consulted the PhosphoSitePlus knowledge base to identify potential phosphorylation modification sites of FBW7 (Figure S17B). We then examined the levels of total serine (Ser)-linked phosphorylation and threonine (Thr)-linked phosphorylation of FBW7 in the presence of PIK3CA mutation. Interestingly, PIK3CA mutations with two hotspots consistently increased the total Thr-linked phosphorylation levels of FBW7 without affecting Ser-linked phosphorylation (Figure 4I). To determine the specific threonine residue(s) of FBW7 phosphorylated by phosphatidylinositol 3-kinase (PI3K) activity, we introduced mutations at different Thr-phosphorylation sites in FBW7. The FBW7 T680A mutant almost completely abolished Thr-linked phosphorylation of FBW7 (Figure 4J). In contrast, the Thr-linked phosphorylation of other FBW7 mutant proteins, including T205A, T692A, and T695A, resembled that of the FBW7 WT protein (Figure 4J). Moreover, while the activation of PI3K activity failed to enhance Thr-linked phosphorylation of the FBW7 T680A mutant, it clearly increased Thr-linked phosphorylation of the other three FBW7 mutant proteins, along with an increase in PI3K downstream substrate activity (Figure 4K). Furthermore, the FBW7 T680A mutant exhibited higher stability compared to the WT protein, suggesting

reduced degradation of the phospho-deficient FBW7 T680A mutant (Figure 4L). The data indicate that oncogenic PIK3CA signaling specifically destabilizes FBW7 by triggering phosphorylation of FBW7 at Thr680.

To dissect the signaling cascade that links the active PI3K and FBW7 phosphorylation, we searched for kinases differentially interacting with FBW7 among PIK3CA mutant and WT tumor cells. Among the potential FBW7-binding proteins, six kinases—serum/glucocorticoid regulated kinase family member 3 (SGK3), phosphoglycerate kinase 1 (PGK1), serine/threonine kinase 39 (STK39), cyclin-dependent kinase 1 (CDK1), and aurora kinase B (AURKB)—were selected for further validation (Figure S17C and Table S3). We first showed that silencing of PGK1, STK39, CDK1, or AURKB had negligible impact on threonine-linked phosphorylation and total protein level of FBW7 and cPLA2 protein abundance (Figure S17D). Notably, silencing of SGK3 evidently attenuated the Thr-linked phosphorylation of FBW7, with a concomitant increase in FBW7 protein level and decrease in cPLA2 protein level and AA abundance in PIK3CA mutant tumor cells (Figures 4M, 4N, S17E, and S17F). To further evaluate FBW7 as a candidate substrate for SGK3 signaling, we developed a custom antibody that specifically recognized the FBW7 T680 phosphorylation site (Figure S17G). Consistent with our observations, the reduction in FBW7 T680 phosphorylation occurred upon SGK3 silencing but not when silencing the other five kinases (Figures 4M and S17H). Moreover, immunoprecipitation revealed a greater interaction between SGK3 and FBW7 in PIK3CA mutant cells (Figure S17I). The results suggest that SGK3 is the key downstream signaling molecule of active PI3K $\alpha$  responsible for phosphorylating FBW7 at Thr680.

Previously, it was reported that peptidyl-prolyl *cis-trans* isomerase NIMA-interacting 1 (Pin1) is involved in the phosphorylation-dependent degradation of FBW7.<sup>23</sup> Thus, we hypothesized that active PI3K $\alpha$  kinase promotes the degradation of FBW7 in a Pin1-dependent manner. Supporting this hypothesis, we observed a stronger interaction between FBW7 and Pin1 in PIK3CA mutant cells (Figure S18A). In addition, silencing Pin1 resulted in increased stability of the FBW7 protein and reduced levels of AA (Figures S18B and S18C).

The PDK1/SGK3 signaling pathway has been proposed as a downstream effector of AKT-independent PI3K $\alpha$  oncogenic signaling.<sup>24</sup> Hence, we investigated whether FBW7 T680 phosphorylation triggered by active PI3K $\alpha$  is independent of AKT. First, in line with our findings, treatment with the PI3K $\alpha$  selective inhibitor BYL719 (alpelisib) significantly impaired the viability of NCM460 cells, accompanied by decreased AA abundance (Figures S19A and S19B). Subsequently, knockdown of PDK1 resulted in reduced FBW7 phosphorylation, increased FBW7 protein levels, and the reduction of cPLA2 protein and AA abundance, reminiscent of the similar observation when SGK3 was silenced (Figures 4O and 4P). PTEN loss leads to the activation of the PI3K/PDK1/SGK3 signaling pathway.<sup>25</sup> We observed

(M–P) Scrambled siRNA (NC) or siRNAs against SGK3 or PDK1 were transfected into DLD1 parental cells for 72 h. Cell lysates were immunoprecipitated with FBW7 antibody and blotted with the indicated antibodies (M and O). Quantitative abundance of AA in those cells were measured (N and P, mean  $\pm$  SEM,  $n = 3$ ). (Q) Diagram summarizing the proposed model for the PI3K–PDK1–SGK3 signaling phosphorylating FBW7 at Thr680, leading to the increased stability of cPLA2 protein and enhanced biosynthesis of AA. Statistical analyses, \*\* $p < 0.01$ ; \*\*\* $p < 0.001$ .

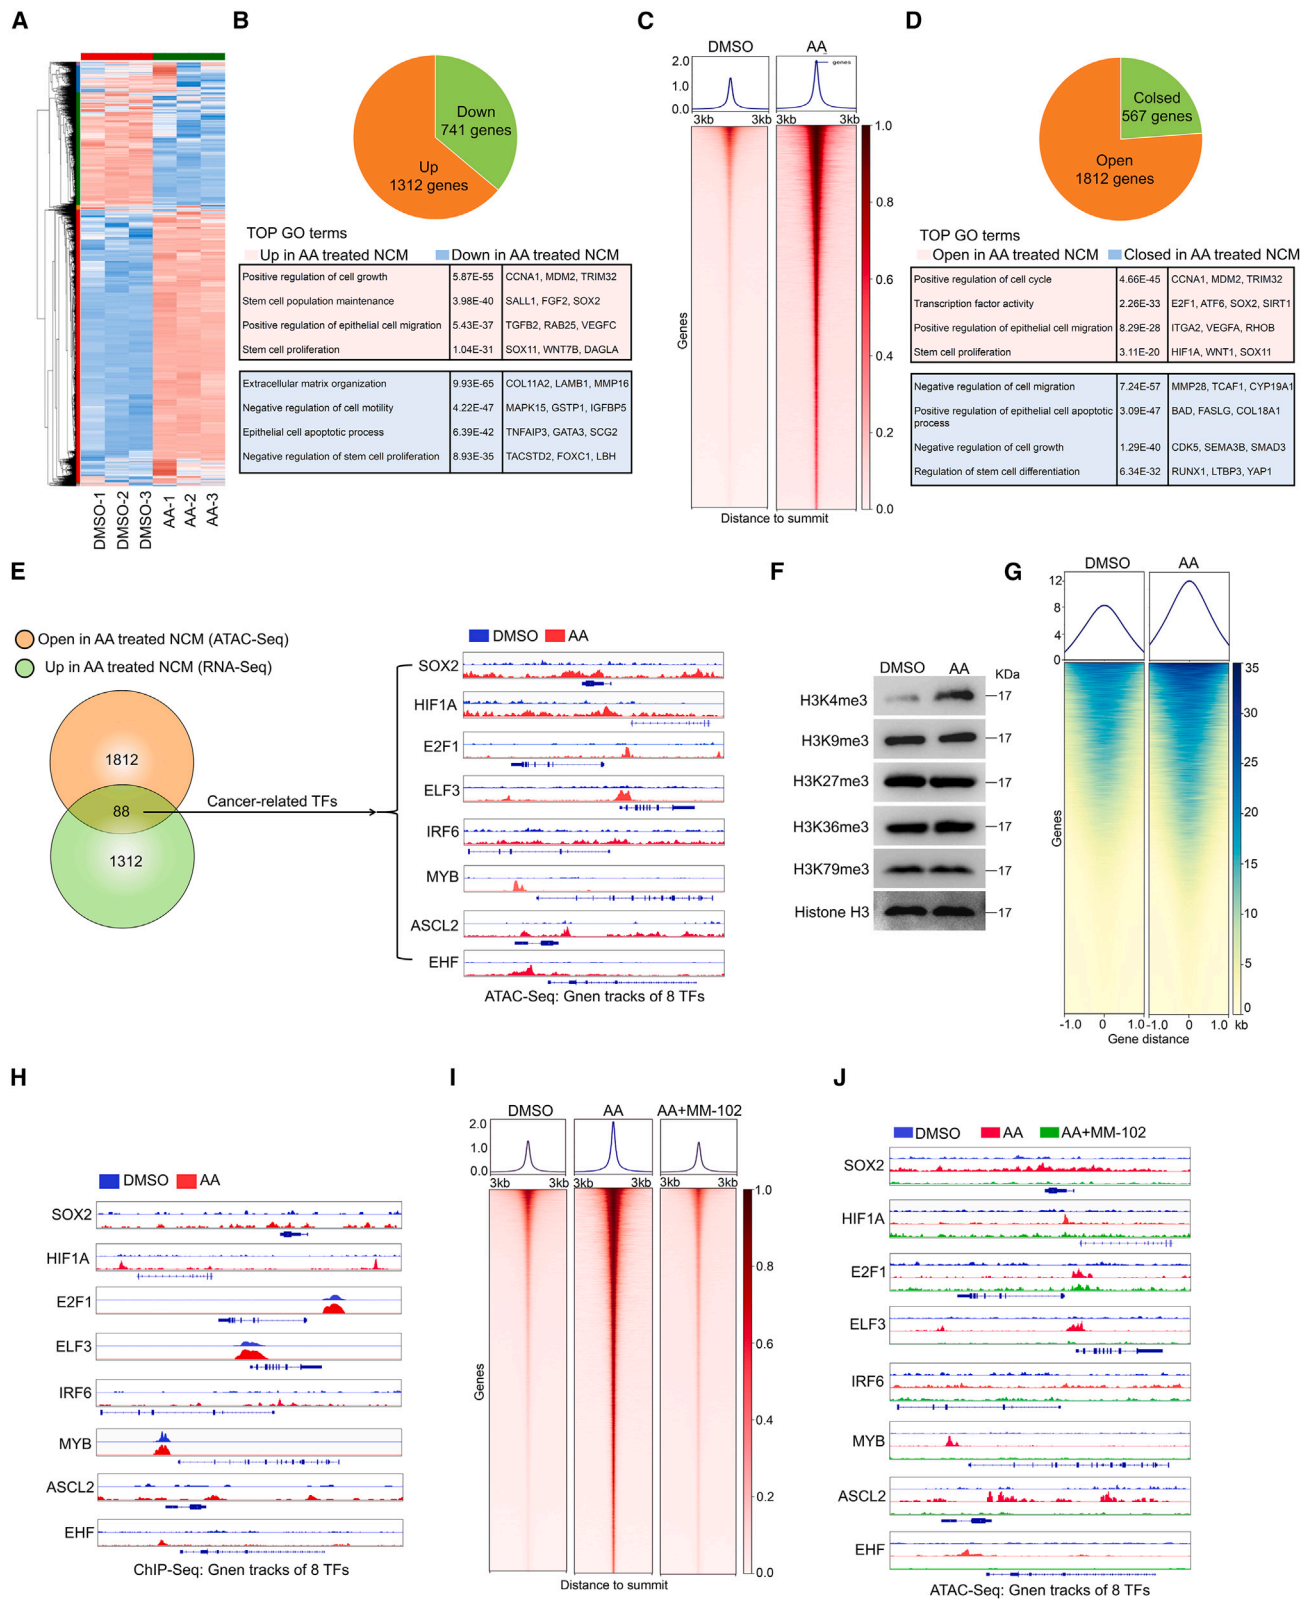

(legend on next page)

that PTEN knockdown activated PDK1/SGK3 signaling and enhanced FBW7 T680 phosphorylation, with concomitant decrease in FBW7 protein level, increase in cPLA2 protein level, and AA abundance in PIK3CA WT cells (Figures S19C and S19D). Moreover, NCM460 cells treated with conditioned medium derived from DLD1<sup>WT</sup> PTEN knockdown cells exhibited enhanced cell-proliferative ability (Figures S19E and S19F). Interestingly, neither genetic knockdown nor pharmacological inhibition (GDC0068) of AKT had any impact on the instigation of NCM460 cells, phosphorylation of FBW7, protein levels of FBW7 and cPLA2, or AA abundance triggered by PIK3CA mutation (Figures S19G–S19K). The PI3K/PKC $\zeta$ /cPLA2 axis was previously proposed to regulate AA levels in the context of PIK3CA mutation. We observed that PKC $\zeta$  knockdown barely impacts FBW7 T680 phosphorylation and total protein levels of FBW7 and cPLA2 (Figure S19L). In summary, our model establishes the biological connections between previously unrelated components, linking PI3K signaling and cPLA2 homeostasis, thereby enhancing AA metabolism (Figure 4Q).

### Arachidonic acid impacts chromatin remodeling via H3K4me3

In AA downstream metabolic cascade, cyclooxygenase 1 (COX1), COX2, or prostaglandin (PG) endoperoxide H synthases catalyze AA into PGs (PGD2 and PGE2).<sup>26</sup> We thus sought to investigate whether these downstream metabolites of AA mediate oncogenic signals from PIK3CA mutant tumor cells to NCM460 cells. Surprisingly, we observed that the levels of PGD2 or PGE2 in the sera or tumor tissues of PIK3CA mutant patients with CRC were almost equivalent to those in the PIK3CA WT group, which did not coincide with the alteration of AA (Figures S20A and S20B). Importantly, silencing COX1 or COX2 failed to attenuate the enhancement of NCM460 cell viability induced by AA (Figures S20C and S20D). Consequently, we conclude that the downstream metabolic cascade of AA is not significantly activated in the presence of PIK3CA mutation.

Previous studies revealed that AA can modulate the expression of numerous genes in colon cancer cells<sup>27</sup>; however, the underlying mechanisms have remained largely unclear. Our RNA-seq (RNA-seq) data demonstrated that the expression levels of 1,312 genes were upregulated while 741 genes were downregulated in AA-treated NCM460 cells compared to the control (Figures 5A and 5B). Extensive changes in gene expression are often closely linked to chromatin remodeling. Therefore,

we investigated the chromatin accessibility status in AA-treated NCM460 cells using the assay for transposase-accessible chromatin with sequencing (ATAC-seq). We observed that 1,812 genes exhibited increased accessibility, while 567 genes showed decreased accessibility, in AA-treated NCM460 cells compared to the control (Figures 5C and 5D).

Transcription factors (TFs) play a crucial role in regulating tumor development and malignant progression by regulating gene expression. Thus, we conducted an intersection analysis of the upregulated gene set from RNA-seq data and the open gene set from ATAC-seq (Tables S4–S6). Among the 88 genes that overlapped, we identified eight cancer-related TFs—SOX2, HIF1A, E2F1, ELF3, IRF6, MYB, ASCL2, and EHF—that exhibited upregulated expression and were in an open state in related chromatin regions after AA stimulation (Figure 5E). The gene tracks of these eight TFs showed significantly increased accessibility in AA-treated NCM460 cells compared to control NCM460 cells (Figure 5E). Consistently, we observed a significant enhancement in the accessibility of the eight TFs in PIK3CA mutant cell-educated NCM460 cells compared to PIK3CA WT cell-educated NCM460 cells or the NCM460 cell line (Figures S21A–S21D). More importantly, expression of eight TFs was significantly reduced in NCM460 cells treated with DLD1<sup>E545K</sup> cPLA2 KO cells; while exogenous AA assisted DLD1<sup>E545K</sup> cPLA2 KO cells in restoring the gene expression (Figure S21E). The findings suggest that AA may induce the expression of a wide range of cancer-related TFs by regulating chromatin remodeling in IECs.

The primary mechanisms that can impact chromatin remodeling in cells include DNA methylation, histone acetylation, and histone methylation.<sup>28</sup> First, AA treatment barely impacted DNA methylation (Figure S22A). Furthermore, we observed that AA stimulation did not significantly alter several histone acetylation markers (Figure S22B). Moreover, the enrichments of those histone acetylation markers on promoter region of SOX2 gene do not show significant changes after AA treatment (Figure S22C). The data indicate that transcriptional regulation of downstream oncogenic genes by AA may not rely on DNA methylation or histone methylation.

In addition, conditioned medium or exosome components from tumor donor cells had no impact on the phosphorylation and total protein level of cPLA2 in NCM460 cells (Figure S22D). Moreover, reduced levels of AA were observed in NCM460 cells treated with conditioned medium from PIK3CA mutant tumor

### Figure 5. AA impacts chromatin remodeling via H3K4me3

- (A) Heatmap of RNA-seq analyses of NCM460 cells treated with DMSO or AA (10  $\mu$ M).  
 (B) Pie chart displaying the upregulated genes and downregulated genes in AA-treated NCM460 cells compared to the control group (upper panel). Overview of gene ontology (GO) enrichment analysis of the differential gene profiles (lower panel).  
 (C) Heatmap showing clustering of ATAC-seq data of NCM460 cells treated with DMSO or AA (10  $\mu$ M).  
 (D) Pie chart illustrating the open genes and closed peaks in AA-treated NCM460 cells compared to the control group (upper panel). Overview of GO enrichment analysis of the differential genes (lower panel).  
 (E) Venn diagram summarizing the intersected genes involved in ATAC-seq and RNA-seq (left). Gene tracks of the eight TF loci with corresponding ATAC-seq coverage files (right).  
 (F) Histone trimethylation markers were detected in NCM460 cells treated with DMSO or AA (10  $\mu$ M).  
 (G) ChIP-seq analysis of H3K4me3 in NCM460 cells treated with DMSO or AA (10  $\mu$ M).  
 (H) Gene tracks of the eight TF loci with corresponding ChIP-seq coverage files.  
 (I) Heatmap showing clustering of ATAC-seq data of NCM460 cells treated with DMSO, 10  $\mu$ M AA, or 10  $\mu$ M AA plus 50  $\mu$ M MM-102.  
 (J) Gene tracks of the eight TF loci with corresponding ATAC-seq coverage files.

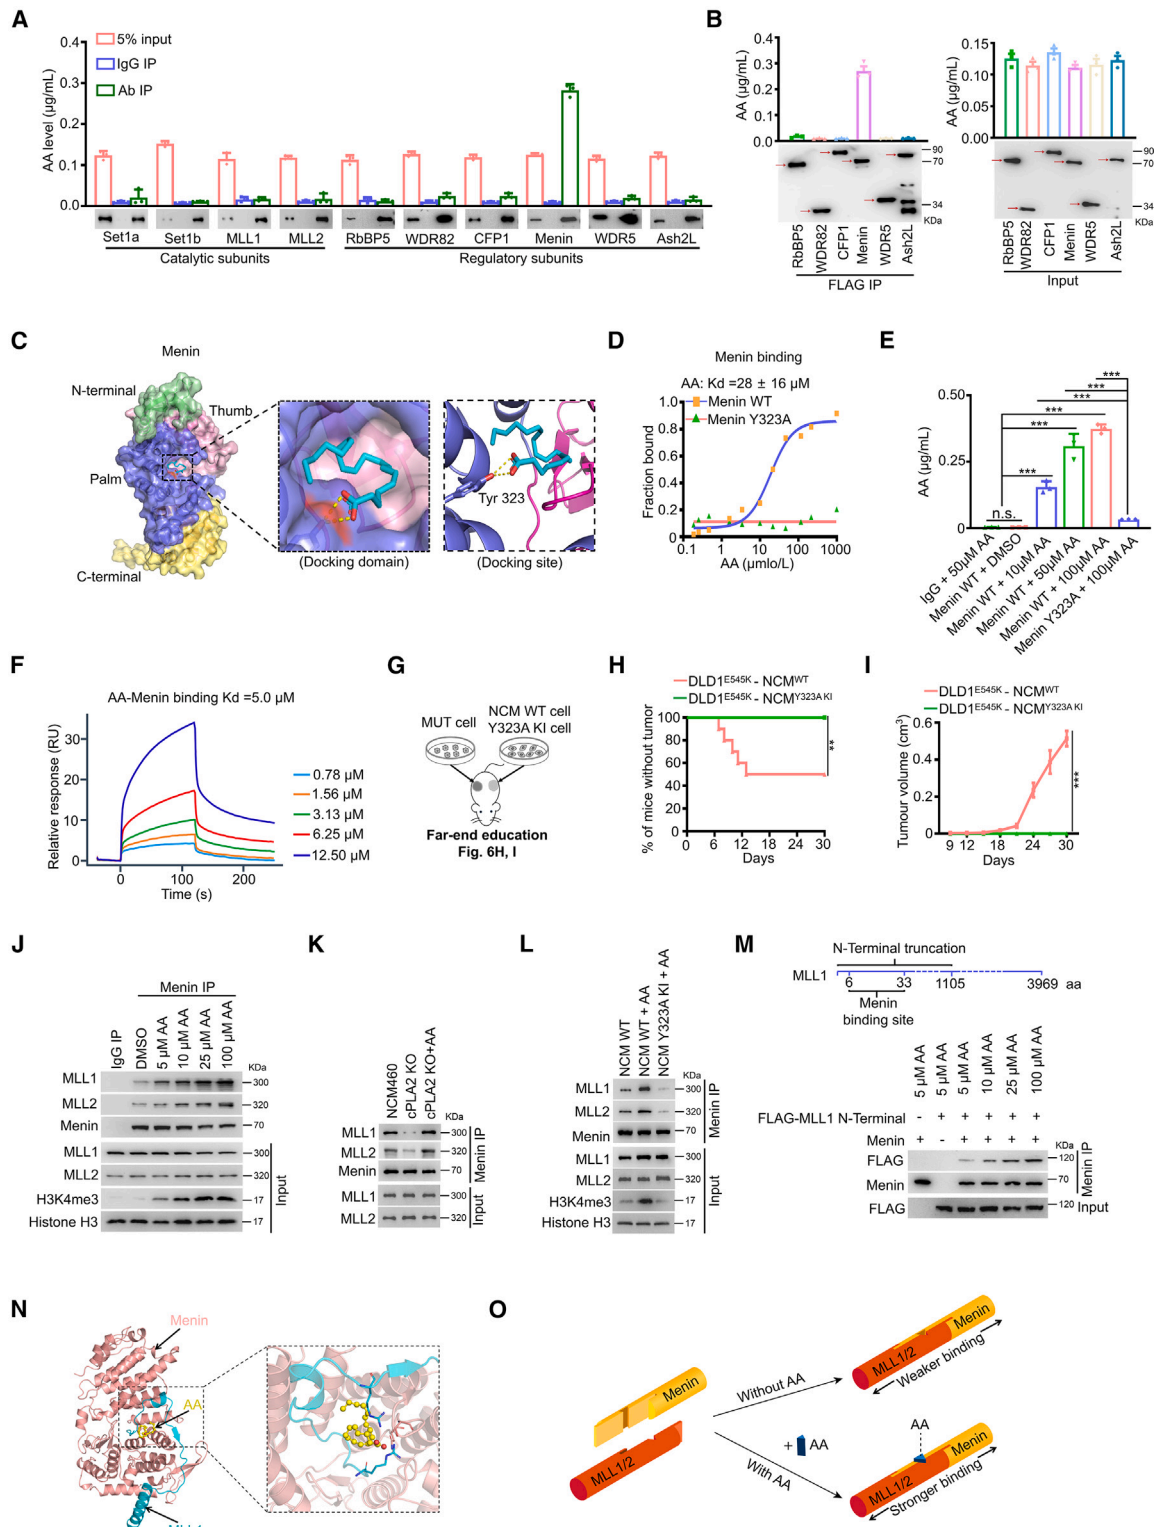

**Figure 6. AA specifically binds to Menin protein and enhances the Menin-MLL1/2 interaction**

(A) Quantitative abundance of AA binding with Compass subunits was measured using an LC-MS-based trace-level metabolite detection method (mean ± SEM, n = 3).

(legend continued on next page)

cells with cPLA2 KO, lowering them to levels equivalent to those in NCM460 cells treated with PIK3CA WT medium (Figure S22E). The findings suggest that conditioned medium from PIK3CA mutant tumor cells directly transport AA to NCM460 cells rather than activating the biosynthesis of AA within NCM460 cells.

We then investigated the impact of AA on histone methylation. Interestingly, AA treatment led to a significant increase in the levels of histone H3K4 trimethylation (H3K4me3) in NCM460 cells, while histone trimethylation at other sites, including H3K4, H3K9, H3K36, and H3K76, remained unaffected (Figure 5F). The observation was further substantiated in educated NCM460 F2 cells and PCE F2 cells from the direct education model (Figures S23A and S23B). Next, we performed chromatin immunoprecipitation sequencing (ChIP-seq) to examine H3K4me3 modification in the promoter chromatin state of AA-treated NCM460 cells. As illustrated in Figure 5G and Table S7, specific analysis of the promoter regions showed that in promoter-associated H3K4me3 2,589 genes were increased and 1,275 genes were reduced in AA-treated NCM460 cells compared to control. The gene tracks of these eight TFs revealed increased levels of promoter-associated H3K4me3 in AA-treated NCM460 cells (Figure 5H and Table S8). Moreover, we observed that MM-102, an H3K4me3 inhibitor, effectively disrupted the domestication of NCM460 cells triggered by exogenous AA supplementation (Figures S23C–S23E) as well as the enhanced accessibility of the locus containing the eight TFs, as observed in the ATAC-seq gene track coverage files (Figures 5I and 5J). Collectively, the findings coherently validate that AA activates cancer-related TF transcription by modulating H3K4me3.

### AA specifically binds to Menin protein and enhances the Menin-MLL1/2 interaction

Next, we examined the expression of subunits of the Set1/Compass methyltransferase complex that is essential for the methylation of H3K4.<sup>29</sup> Interestingly, AA treatment had no impact on the expression of four catalytic subunits and six regulatory subunits (Figure S24A). Evidence showed that molecules with carboxyl groups have the potential to acylate and regulate the activity of their substrate proteins.<sup>30</sup> We demonstrated that AA had no significant reinforcement effect on the acetylation levels of Compass subunits (Figure S24B and Table S9).

Metabolite-protein interactions modulate a variety of cellular processes, thereby playing a major role in maintaining cellular

homeostasis.<sup>31</sup> However, as a lipid molecule with biological activity, the potential AA-interacting proteins remain obscure. Here, we developed an approach by hybridizing immunoprecipitation and liquid chromatography-tandem mass spectrometry (LC-MS/MS) to quantify the trace-level binding of AA to subunit proteins. Interestingly, we observed a significant increase in the abundance of AA in Menin-immunoprecipitated metabolites, with approximately a 31.2-fold enrichment of AA in the anti-Menin immunoprecipitates compared to the immunoglobulin G (IgG) control (Figure 6A). However, the enrichment of AA in immunoprecipitates of the other nine subunits was equivalent to corresponding IgG controls (Figure 6A). Further, we observed approximately 16.2-fold, 28.6-fold, 27.7-fold, 28.1-fold, and 26.1-fold enrichment of AA in anti-Menin immunoprecipitates compared to anti-RbBP5, anti-WDR82, anti-CFP1, anti-WDR5, and anti-Ash2L counterparts, respectively (Figure 6B). The data suggest that AA specifically binds to the Menin regulatory subunit of the Compass complex.

Corroborating these observations, molecular docking analysis showed that AA preferentially docked in the central cavity, at an interface formed by Menin's thumb domain and palm domain (Figure 6C, left), mainly depending on hydrogen (H) bonds with Tyr323 (Figure 6C, right). Biochemically, *in vitro* binding assays demonstrated a direct interaction between purified Menin WT protein and AA and, in contrast, Menin Y323A mutant abrogated the capacity of binding with AA (Figures 6D–6F). We next evaluated the interaction of Menin and arachidonyl alcohol (ADA) or anandamide (ANA), which replaced the carboxyl group of AA (Figure S24C). *In vitro* binding assays showed that levels of either ADA or ANA binding with Menin were similar to that with the IgG control group, suggesting the crucial role of intact carboxyl groups in mediating AA-Menin interaction (Figures S24D and S24E). More importantly, we observed that PIK3CA mutant tumor cells were competent in remotely inducing visible solid neoplasms of NCM460 cells, whereas Menin Y323A mutation disrupted this process (Figures 6G–6I). Furthermore, we observed that compared to the control NCM460 cells, the binding of Menin was increased in the chromatin regions in AA-treated NCM460 cells (Figures S24F and S24G). Cumulatively, the data suggest that AA can directly bind with Menin at Tyr323, and the process is critical for malignant transformation of NCM460 cells.

Next, we unraveled how AA-Menin interaction impacts H3K4 trimethylation. First, the docking region of AA and Menin was located in the central cavity, where the main interacting domain of Menin

(B) Expression constructs of six regulatory subunits of the Compass complex (pCMV FLAG-RbBP5, -WDR82, -WDR5, -CFP1, -Menin, -Ash2L) were transfected into 293T cells. Quantification of AA binding with Compass subunits was measured using an LC-MS-based trace-level metabolite detection method (mean  $\pm$  SEM,  $n = 3$ ).

(C) Molecular docking analysis of AA and Menin protein.

(D) Analysis of the binding of AA to purified Menin WT or Y323A mutant proteins using a microscale thermophoresis (MST) binding assay.

(E) *In vitro* binding of AA and Menin was measured using an LC-MS-based trace-level metabolite detection method (mean  $\pm$  SEM,  $n = 3$ ).

(F) Analysis of the binding of AA to purified Menin WT proteins using surface plasmon resonance assay.

(G–I) Workflow (G), tumor incidence (H), and tumor volume (I, mean  $\pm$  SEM) of NCM460 F1 xenografts from the far-end education model of 6G ( $n = 10$ ).

(J) CoIP analysis of the interactions between Menin and MLL1/2 in NCM460 cells treated with various amounts of AA.

(K) CoIP analysis of the interactions between Menin and MLL1/2 in the indicated cells.

(L) CoIP analysis of the interactions between Menin and MLL1/2 in the indicated cells.

(M) *In vitro* binding of purified Menin (100 ng) and N-terminal truncation construct of MLL1 (100 ng) were evaluated using coIP assay.

(N) Docking model analysis of Menin and MLL1 with AA participation.

(O) Schematic diagram illustrating the “mortise and tenon architecture” of the consortium composed of Menin, AA, and MLL1/2.

Statistical analyses, n.s., not significant; \*\* $p < 0.01$ ; \*\*\* $p < 0.001$ .

and mixed lineage leukemia (MLL) proteins was situated (Figure 6C). Second, small interfering RNAs (siRNAs) targeting MLL1, MLL2, or Menin significantly disrupted the increase of NCM460 cell viability evoked by AA (Figure S25A). Menin-MLL1/2 interactions play a crucial role in activating MLL1/2 methyltransferase activity. We thus speculated that AA may function as a latch to strengthen the interaction of Menin and MLL and trigger H3K4 methylation. Indeed, exogenous supplementation of AA evidently contributed to the interaction of Menin and MLL1/2 and a concomitant increase in H3K4me3 levels (Figures 6J and S25B). cPLA2 KO then reduced the binding of Menin and MLL1/2, and affinity was restored after AA supplementation (Figure 6K). Consistently, exogenous supplementation of AA failed to restore the interaction of Menin and MLL1/2 in Menin Y323A Ki NCM460 cells (Figure 6L). *In vitro* co-immunoprecipitation (coIP) assay consistently showed that AA indeed clearly reinforced the interaction between recombinant Menin and the truncated MLL1 protein (Figure 6M). Finally, computational structural analysis demonstrated that participation of AA strengthened the interaction of Menin and MLL1, with a lower docking score (Figures 6N and S25C). These results suggest that AA may bind to Menin via the Tyr323 site, mediating the interaction of Menin and MLL. The consortium of Menin-AA-MLL can be vividly likened to “mortise and tenon architecture,” in which AA serves as a latch and plays an important role in maintaining the stability and integrity of the Menin-MLL complex (Figure 6O).

### Combination of a Menin-MLL1 interaction inhibitor VTP50469 and p110 $\alpha$ selective inhibitor alpelisib results in tumor repression

We showed that AA-Menin interaction is required for PIK3CA oncogenicity, suggesting that a small-molecule inhibitor targeting this interaction would be an effective therapeutic approach. To this end, we employed a potent and selective inhibitor of the Menin-MLL1 interaction, VTP50469, which has shown remarkable pre-clinical efficacy.<sup>32</sup> Pharmacologically, VTP50469 displaced Menin from the Menin-MLL1 complex and inhibited chromatin occupancy of MLL at select genes and transcriptional activation.<sup>32</sup> Coincidentally, Tyr323, where AA binds to Menin, is one of the key sites for VTP50469 interacting with Menin. We thus postulated that VTP50469 may be the small-molecule inhibitor targeting AA-Menin interaction. Indeed, *in vitro* binding assays unequivocally demonstrated that VTP50469 completely abrogated the AA-Menin interaction (Figure S26A). Moreover, VTP50469 reversed the interaction of Menin and MLL1/2 triggered by AA (Figure S26B). The findings imply that VTP50469, with its broader coverage, advantageously binds to Menin, thereby blocking the interaction between AA and Menin (Figure S26C).

The potential anti-solid neoplastic properties of VTP50469 remain obscure. To address this, we implemented a therapeutic strategy guided by VTP50469 using an AOM/DSS-induced colorectal tumorigenesis model (Figure 7A). Although no significant difference in treatment effectiveness was observed in the PIK3CA WT cell medium group, there was a marked reduction in the number of tumor numbers and improved mouse survival time in the PIK3CA mutant cell medium group upon VTP50469 treatment (Figures 7B–7D and S27A). It is worth noting that VTP50469 selectively inhibited the interaction of Menin-MLL1 in tumors from the PIK3CA mutant medium group (Figure S27B).

The consistent findings demonstrate that VTP50469 harbors the property of preferentially suppressing solid tumor carrying PIK3CA mutations. Next, we employed patient-derived xenograft (PDX) models to evaluate the therapeutic effect of VTP50469 alone or in combination with alpelisib (Figure 7E). In the PIK3CA WT PDX models, the drug combination only resulted in a deceleration of tumor growth (Figures 7F and S27C). However, in the PIK3CA mutant PDX models, the combination of VTP50469 and alpelisib led to tumor regression (Figures 7G and S27C). Indeed, the drug combination synergistically inhibited tumor growth in CRCs with PIK3CA mutations while exhibiting only an additive effect in CRCs with WT PIK3CA (Figure S27D). Collectively, the results demonstrate that the combination of VTP50469 and alpelisib could be an effective treatment for cancers harboring PIK3CA mutations.

### DISCUSSION

In the present study, we revisited the tumor somatic mutation theory and demonstrate that the tumor cells harboring PIK3CA gene mutations transmit oncogenic signals to IECs, initiating their malignant transformations, thereby promoting CRC development and progression. We demonstrate that PIK3CA mutant cells transmit exosomal AA to IECs and trigger chromatin remodeling, leading to malignant transformation.

The current study yielded an intriguing finding: immortalized NCM460 cells have the ability to undergo transformation into malignant cells that can form neoplasms and metastasize. However, PCE cells only acquire a more energetic cell phenotype following induction. Interestingly, we observed a significant enhancement of AOM/DSS-induced colorectal tumorigenesis when the cells were treated with medium from PIK3CA mutant cells. The findings lead us to the conclusion that the malignant signals from mutated cells alone are insufficient. Additional factors, such as immortalization and inflammatory stimulation in IECs, may be necessary for the induction of malignant cells. Recent evidence suggests that tumorigenesis involves a two-step mechanism: immortalization and genomic instability.<sup>33</sup> Notably, the examination of educated NCM460 and PCE F2 cells revealed the emergence of gene gains and amplifications. The results suggest that the education process in our model may contribute to an important extent in the full stages of tumorigenesis. Besides, it is important to note that NCM460 cells, although designated as normal cells, are derived from colon tissue of a patient suffering from gastric cancer and are spontaneously immortalized.<sup>34</sup> We thus inferred that NCM460 are most likely already systemically inflamed from the primary cancer tissue of the patient. Hence, it can be easier to malignantly transform NCM460 than PCE cells, which have not been exposed in such alterations.

Protein-metabolite interactions (PMIs) are specific interactions that play a crucial role in various cellular processes and modulate signal transduction by affecting the conformation, stability, and function of target proteins through allosteric modulation.<sup>35–37</sup> However, PMIs often exhibit low affinity and are challenging to systematically identify. In the present study, we developed an immunoprecipitation integrated with an LC-MS/MS approach to quantify trace-level ligand-based metabolites and characterize

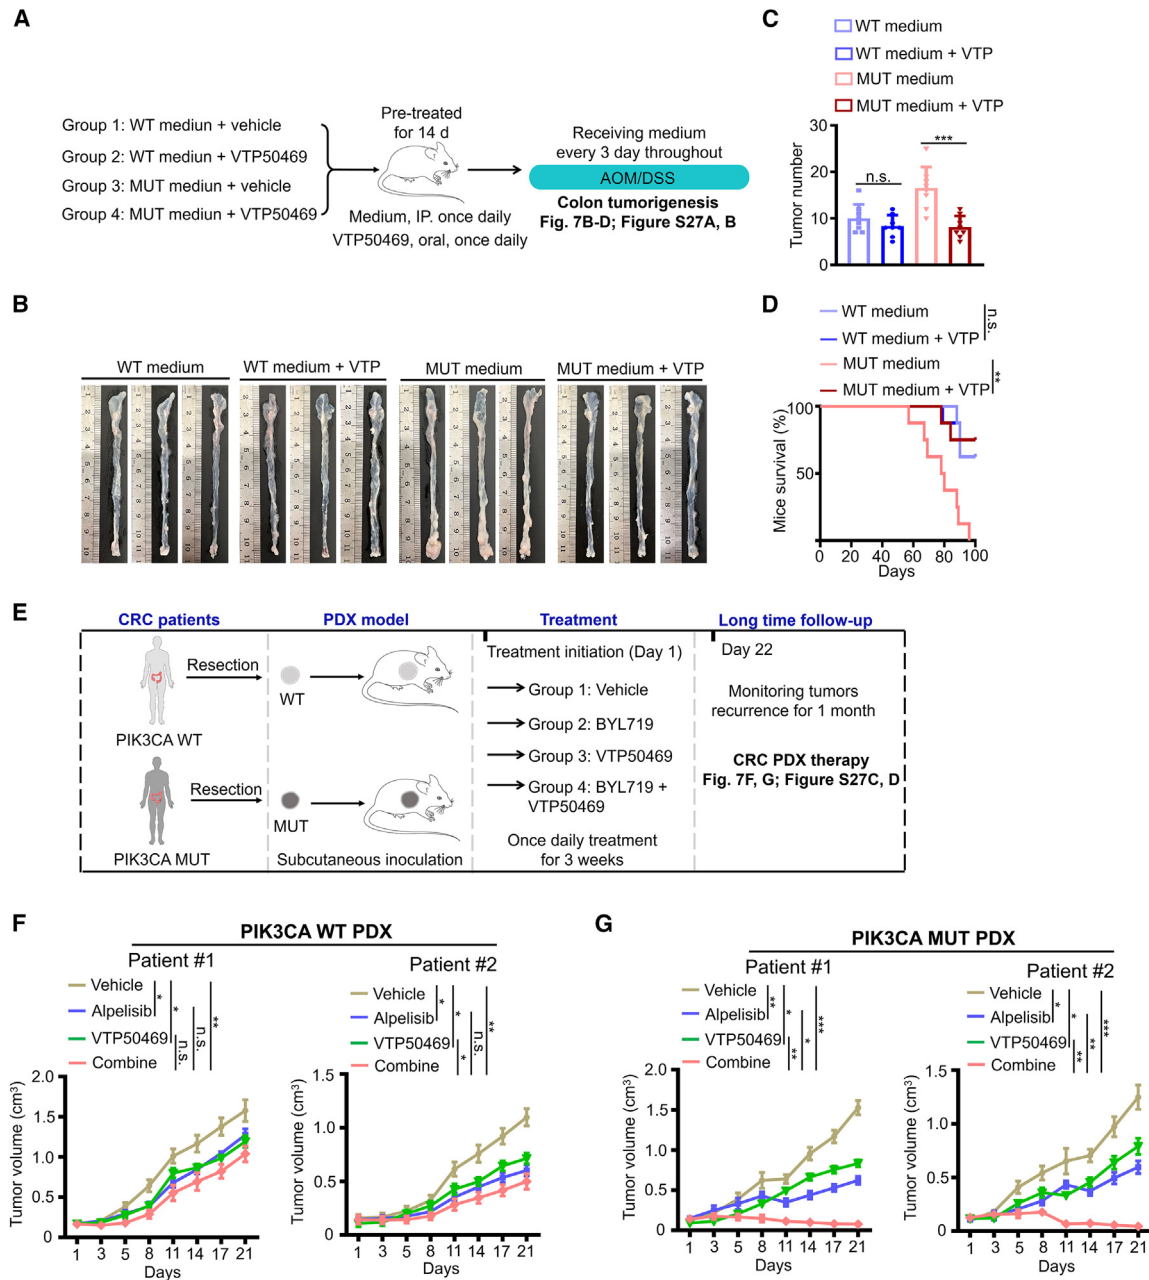

**Figure 7. Combination of the Menin-MLL1 interaction inhibitor VTP50469 and the selective p110 $\alpha$  inhibitor alpelisib leads to tumor repression** (A–D) Workflow (A) and representative macroscopic colon images (B), tumor counts (C, mean  $\pm$  SEM), and survival (D) of mice in the AOM/DSS-induced colon tumorigenesis model ( $n = 8$ ).

(E) Schematic representation of the *in vivo* experimental design for drug treatment of CRC PDX tumors.

(F and G) Subcutaneous xenograft tumors established from two CRC PDX with WT PIK3CA (F), a CRC PDX with PIK3CA H1047R mutation (MUT-1), and a CRC PDX with PIK3CA E545K mutation (MUT-2) (G) were treated with alpelisib, VTP50469, or the combination of both drugs. Data are presented as means  $\pm$  SD;  $n = 8$  or 7.

Statistical analyses, n.s., not significant; \* $p < 0.05$ ; \*\* $p < 0.01$ ; \*\*\* $p < 0.001$ .

PMIs by enriching proteins with metabolites. The primary downstream target of AA in IECs is Menin, a subunit of MLL1/2-containing histone methyltransferase complexes responsible for trimethylating histone H3 at lysine 4 (H3K4me3). Menin is a nuclear epigenetic regulator that has divergent roles in cancers that occur

in a highly tumor-specific manner.<sup>38–40</sup> Menin has been reported to be increased in CRC and as an oncogenic factor by providing resistance to gefitinib.<sup>41</sup> As an important regulatory subunit of the Compass complex, Menin acts as an essential oncogenic cofactor for MLL1-mediated epigenetic dysregulation through

its direct interaction with MLL1.<sup>42</sup> Our computational structural analysis and biochemical results revealed that AA directly binds to Menin and acts as a stabilizing factor, maintaining the integrity and stability of Menin-MLL1/2 interactions. The structural insights into the interaction between AA and Menin will guide us in developing more specific allosteric inhibitors that can effectively target the AA-Menin interaction and disrupt the malignant signaling cascade in IECs.

In 2019, the US Food and Drug Administration approved alpelisib in combination with the endocrine therapy drug fulvestrant for the treatment of patients with advanced or metastatic breast cancer carrying PIK3CA mutations.<sup>15</sup> While alpelisib has demonstrated partial tumor remission in advanced breast cancer, its effectiveness in colon cancer treatment proved unsatisfactory in early clinical trials,<sup>17</sup> often accompanied by severe side effects such as cutaneous anaphylaxis and hyperglycemia.<sup>43</sup> Our current data reveal an oncogenic signaling pathway external of PIK3CA mutant tumor cells, suggesting that targeting mutant tumor cells alone may be insufficient. Considering the significance of the AA-Menin interaction in PIK3CA mutation-mediated oncogenicity, targeting this metabolite-protein interaction represents a promising therapeutic strategy. VTP50469, a small-molecule inhibitor of the Menin-MLL protein-protein interaction, has demonstrated remarkable pre-clinical efficacy in *in vivo* models of acute leukemia. VTP50469 binds to the MLL binding pocket on Menin, and its key binding features include anchoring H bonds mediated by Tyr276 and Trp341 as well as a distinct  $\pi$ -cation interaction mediated by Tyr319 and Tyr323.<sup>42</sup> Interestingly, AA directly binds to Menin through a Tyr323-based H bond, indicating competitive binding between AA and VTP50469 with Menin. Biochemical experiments and computational structural analysis coherently reveals stronger binding affinity between VTP50469 and Menin compared to the AA-Menin interaction. The evidence strongly suggests that VTP50469 is an ideal inhibitor of the AA-Menin interaction. In terms of drug development, we demonstrate that the combination of alpelisib and VTP50469 synergistically inhibits tumor growth and induces tumor regression in CRC PDX models carrying PIK3CA mutations. The findings raise the possibility of pursuing a phase 1 clinical trial to evaluate the combination of alpelisib and VTP50469 in CRC patients with tumors harboring PIK3CA mutations.

### Limitations of the study

We demonstrate that PIK3CA mutant tumor cells synthesize more AA than PIK3CA WT tumor cells. However, whether AA impacts the chromatin remodeling of tumor cells and subsequently affects their malignant behaviors remains to be revealed. Thus, additional studies are necessary to comprehensively elucidate the function of AA as a histone methylation regulator in tumor cells. In addition, we have tested the therapeutic effects of VTP50469 and alpelisib in CRC PDX models. The anti-tumor efficacy of this combination needs to be clinically evaluated.

### STAR★METHODS

Detailed methods are provided in the online version of this paper and include the following:

- KEY RESOURCES TABLE
- RESOURCE AVAILABILITY
  - Lead contact
  - Materials availability
  - Data and code availability
- EXPERIMENTAL MODEL AND SUBJECT PARTICIPANT DETAILS
  - Human subjects
  - Mice
  - The Direct Education Model
  - The Far-end Education Model
  - The colon orthotopic cancer model
  - The tail vein injection metastasis model
  - The AOM/DSS-induced colorectal tumorigenesis model
  - Generation of transgenic *R26-Pik3ca*<sup>H1047R</sup> mice
  - CRC PDX tumors
  - Cell culture and transfection
- METHOD DETAILS
  - Immunohistochemistry and immunofluorescence analyses
  - DNA constructs and mutagenesis
  - CRISPR/CAS9 genome editing
  - Isolation and purification of exosomes and treatment
  - RNA extraction and quantitative real-time PCR analysis
  - Cell viability assay and colony formation
  - Spheroid formation assay
  - Invasion assay
  - Co-immunoprecipitation
  - *In-vitro* cPLA2 ubiquitination assay
  - *In-vitro* binding assay
  - Western blot
  - Untargeted metabolomics analysis
  - Trace-level quantitation of ligand-based AA binding with Compass complex subunits
- QUANTIFICATION AND STATISTICAL ANALYSIS

### SUPPLEMENTAL INFORMATION

Supplemental information can be found online at <https://doi.org/10.1016/j.xcrm.2024.101510>.

### ACKNOWLEDGMENTS

This study was supported by grants from the National Natural Science Foundation of China (82173371, 82273447, 82273069, 82372679), with project funding from the China Postdoctoral Science Foundation (2022M711320, 2022M711322), the Tai Shan Young Scholar Foundation of Shandong Province (tsqn201909192, tsqn202312383), the Shandong Provincial Natural Science Foundation (ZR2021QH021, ZR202112020099), and the Shandong Postdoctoral Innovation Project (SDCX-ZG-202201002).

### AUTHOR CONTRIBUTIONS

H.X. and Bin Zhang designed the study, directed the project, and supervised data analysis. B.H. and Q.B. performed and analyzed most experiments. R.Z., Y.Y., and G.D. performed the CRISPR knockout generation, the site-directed mutagenesis constructs, and assisted with immunohistochemistry and immunofluorescence staining. Baogui Zhang provided primary CRC specimens, followed up the survival status and prognosis, and assisted with the construction



of CRC PDX models. S.W. and D.T. assisted with xenograft studies and drug treatment. W.X. and Y.H. assisted with data analysis and manuscript editing and provided essential technical support for CRISPR knockin cell establishment. Y.Z. and M.Z. helped with establishment and breeding of transgenic mice and provided technical support for primary cell culture. B.H., Q.B., H.X., and Bin Zhang wrote the manuscript. All authors edited the manuscript.

#### DECLARATION OF INTERESTS

The authors declare no competing interests.

Received: October 31, 2023

Revised: February 7, 2024

Accepted: March 20, 2024

Published: April 12, 2024

#### REFERENCES

- Nanki, K., Fujii, M., Shimokawa, M., Matano, M., Nishikori, S., Date, S., Takano, A., Toshimitsu, K., Ohta, Y., Takahashi, S., et al. (2020). Somatic inflammatory gene mutations in human ulcerative colitis epithelium. *Nature* 577, 254–259.
- Becker, W.R., Nevins, S.A., Chen, D.C., Chiu, R., Horning, A.M., Guha, T.K., Laquindanum, R., Mills, M., Chaib, H., Ladabaum, U., et al. (2022). Single-cell analyses define a continuum of cell state and composition changes in the malignant transformation of polyps to colorectal cancer. *Nat. Genet.* 54, 985–995.
- Lee-Six, H., Olafsson, S., Ellis, P., Osborne, R.J., Sanders, M.A., Moore, L., Georgakopoulos, N., Torrente, F., Noorani, A., Goddard, M., et al. (2019). The landscape of somatic mutation in normal colorectal epithelial cells. *Nature* 574, 532–537.
- Liao, W., Overman, M.J., Boutin, A.T., Shang, X., Zhao, D., Dey, P., Li, J., Wang, G., Lan, Z., Li, J., et al. (2019). KRAS-IRF2 Axis Drives Immune Suppression and Immune Therapy Resistance in Colorectal Cancer. *Cancer Cell* 35, 559–572.e7.
- Vasan, N., Razavi, P., Johnson, J.L., Shao, H., Shah, H., Antoine, A., Ladewig, E., Gorelick, A., Lin, T.Y., Toska, E., et al. (2019). Double PIK3CA mutations in cis increase oncogenicity and sensitivity to PI3K $\alpha$  inhibitors. *Science* 366, 714–723.
- Su, Z., Kon, N., Yi, J., Zhao, H., Zhang, W., Tang, Q., Li, H., Kobayashi, H., Li, Z., Duan, S., et al. (2023). Specific regulation of BACH1 by the hotspot mutant p53(R175H) reveals a distinct gain-of-function mechanism. *Nat. Can. (Ott.)* 4, 564–581.
- Martínez-Reyes, I., and Chandel, N.S. (2021). Cancer metabolism: looking forward. *Nat. Rev. Cancer* 21, 669–680.
- Kang, H.B., Fan, J., Lin, R., Elf, S., Ji, Q., Zhao, L., Jin, L., Seo, J.H., Shan, C., Arbiser, J.L., et al. (2015). Metabolic Rewiring by Oncogenic BRAF V600E Links Ketogenesis Pathway to BRAF-MEK1 Signaling. *Mol. Cell* 59, 345–358.
- Sulkowski, P.L., Oeck, S., Dow, J., Economos, N.G., Mirfakhraie, L., Liu, Y., Noronha, K., Bao, X., Li, J., Shuch, B.M., et al. (2020). Oncometabolites suppress DNA repair by disrupting local chromatin signalling. *Nature* 582, 586–591.
- Dmitrieva-Posocco, O., Wong, A.C., Lundgren, P., Golos, A.M., Descamps, H.C., Dohnalová, L., Cramer, Z., Tian, Y., Yueh, B., Eskiciak, O., et al. (2022).  $\beta$ -Hydroxybutyrate suppresses colorectal cancer. *Nature* 605, 160–165.
- Gwinn, D.M., Lee, A.G., Briones-Martin-Del-Campo, M., Conn, C.S., Simpson, D.R., Scott, A.I., Le, A., Cowan, T.M., Ruggero, D., and Sweet-Cordero, E.A. (2018). Oncogenic KRAS Regulates Amino Acid Homeostasis and Asparagine Biosynthesis via ATF4 and Alters Sensitivity to L-Asparaginase. *Cancer Cell* 33, 91–107.e6.
- Morris, J.P., 4th, Yashinskii, J.J., Koche, R., Chandwani, R., Tian, S., Chen, C.C., Baslan, T., Marinkovic, Z.S., Sánchez-Rivera, F.J., Leach, S.D., et al. (2019).  $\alpha$ -Ketoglutarate links p53 to cell fate during tumour suppression. *Nature* 573, 595–599.
- Hao, Y., Samuels, Y., Li, Q., Krokowski, D., Guan, B.J., Wang, C., Jin, Z., Dong, B., Cao, B., Feng, X., et al. (2016). Oncogenic PIK3CA mutations reprogram glutamine metabolism in colorectal cancer. *Nat. Commun.* 7, 11971.
- Hao, Y., Wang, C., Cao, B., Hirsch, B.M., Song, J., Markowitz, S.D., Ewing, R.M., Sedwick, D., Liu, L., Zheng, W., and Wang, Z. (2013). Gain of interaction with IRS1 by p110 $\alpha$ -helical domain mutants is crucial for their oncogenic functions. *Cancer Cell* 23, 583–593.
- André, F., Ciruelos, E., Rubovszky, G., Campone, M., Loibl, S., Rugo, H.S., Iwata, H., Conte, P., Mayer, I.A., Kaufman, B., et al. (2019). Alpelisib for PIK3CA-Mutated, Hormone Receptor-Positive Advanced Breast Cancer. *N. Engl. J. Med.* 380, 1929–1940.
- Hao, Y., He, B., Wu, L., Li, Y., Wang, C., Wang, T., Sun, L., Zhang, Y., Zhan, Y., Zhao, Y., et al. (2022). Nuclear translocation of p85 $\beta$  promotes tumorigenesis of PIK3CA helical domain mutant cancer. *Nat. Commun.* 13, 1974.
- Juric, D., Rodon, J., Tabernero, J., Janku, F., Burris, H.A., Schellens, J.H.M., Middleton, M.R., Berlin, J., Schuler, M., Gil-Martin, M., et al. (2018). Phosphatidylinositol 3-Kinase  $\alpha$ -Selective Inhibition With Alpelisib (BYL719) in PIK3CA-Altered Solid Tumors: Results From the First-in-Human Study. *J. Clin. Oncol.* 36, 1291–1299.
- Hoshino, A., Kim, H.S., Bojmar, L., Gyan, K.E., Cioffi, M., Hernandez, J., Zambirinis, C.P., Rodrigues, G., Molina, H., Heissel, S., et al. (2020). Extracellular Vesicle and Particle Biomarkers Define Multiple Human Cancers. *Cell* 182, 1044–1061.e18.
- Kalluri, R., and LeBleu, V.S. (2020). The biology, function, and biomedical applications of exosomes. *Science* 367, eaau6977.
- Ly, C.H., Lynch, G.S., and Ryall, J.G. (2020). A Metabolic Roadmap for Somatic Stem Cell Fate. *Cell Metabol.* 31, 1052–1067.
- Sperber, H., Mathieu, J., Wang, Y., Ferreccio, A., Hesson, J., Xu, Z., Fischer, K.A., Devi, A., Detraux, D., Gu, H., et al. (2015). The metabolome regulates the epigenetic landscape during naive-to-primed human embryonic stem cell transition. *Nat. Cell Biol.* 17, 1523–1535.
- Ji, S., Qin, Y., Shi, S., Liu, X., Hu, H., Zhou, H., Gao, J., Zhang, B., Xu, W., Liu, J., et al. (2015). ERK kinase phosphorylates and destabilizes the tumor suppressor FBW7 in pancreatic cancer. *Cell Res.* 25, 561–573.
- Min, S.H., Lau, A.W., Lee, T.H., Inuzuka, H., Wei, S., Huang, P., Shaik, S., Lee, D.Y., Finn, G., Balastik, M., et al. (2012). Negative regulation of the stability and tumor suppressor function of Fbw7 by the Pin1 prolyl isomerase. *Mol. Cell* 46, 771–783.
- Vasudevan, K.M., Barbie, D.A., Davies, M.A., Rabinovsky, R., McNear, C.J., Kim, J.J., Hennessy, B.T., Tseng, H., Pochanard, P., Kim, S.Y., et al. (2009). AKT-independent signaling downstream of oncogenic PIK3CA mutations in human cancer. *Cancer Cell* 16, 21–32.
- Scortegagna, M., Lau, E., Zhang, T., Feng, Y., Sereduk, C., Yin, H., De, S.K., Meeth, K., Platt, J.T., Langdon, C.G., et al. (2015). PDK1 and SGK3 Contribute to the Growth of BRAF-Mutant Melanomas and Are Potential Therapeutic Targets. *Cancer Res.* 75, 1399–1412.
- Yarla, N.S., Bishayee, A., Sethi, G., Reddanna, P., Kalle, A.M., Dhananjaya, B.L., Dowluru, K.S.V.G.K., Chintala, R., and Duddukuri, G.R. (2016). Targeting arachidonic acid pathway by natural products for cancer prevention and therapy. *Semin. Cancer Biol.* 40–41, 48–81.
- Monjzab, A.M., High, K.P., Connoy, A., Hart, L.S., Koumenis, C., and Chilton, F.H. (2006). Arachidonic acid-induced gene expression in colon cancer cells. *Carcinogenesis* 27, 1950–1960.
- Allis, C.D., and Jenuwein, T. (2016). The molecular hallmarks of epigenetic control. *Nat. Rev. Genet.* 17, 487–500.
- Thornton, J.L., Westfield, G.H., Takahashi, Y.H., Cook, M., Gao, X., Woodfin, A.R., Lee, J.S., Morgan, M.A., Jackson, J., Smith, E.R., et al. (2014). Context dependency of Set1/COMPASS-mediated histone H3Lys4 trimethylation. *Genes Dev.* 28, 115–120.

30. Sun, L., Zhang, H., and Gao, P. (2022). Metabolic reprogramming and epigenetic modifications on the path to cancer. *Protein Cell* *13*, 877–919.
31. Hicks, K.G., Cluntun, A.A., Schubert, H.L., Hackett, S.R., Berg, J.A., Leonard, P.G., Ajalla Aleixo, M.A., Zhou, Y., Bott, A.J., Salvatore, S.R., et al. (2023). Protein-metabolite interactomics of carbohydrate metabolism reveal regulation of lactate dehydrogenase. *Science* *379*, 996–1003.
32. Kurmasheva, R.T., Bandyopadhyay, A., Favours, E., Pozo, V.D., Ghilu, S., Phelps, D.A., McGeehan, G.M., Erickson, S.W., Smith, M.A., and Houghton, P.J. (2020). Evaluation of VTP-50469, a menin-MLL1 inhibitor, against Ewing sarcoma xenograft models by the pediatric preclinical testing consortium. *Pediatr. Blood Cancer* *67*, e28284.
33. Baslan, T., Morris, J.P., 4th, Zhao, Z., Reyes, J., Ho, Y.J., Tsanov, K.M., Bermeo, J., Tian, S., Zhang, S., Askan, G., et al. (2022). Ordered and deterministic cancer genome evolution after p53 loss. *Nature* *608*, 795–802.
34. Sahi, J., Nataraja, S.G., Layden, T.J., Goldstein, J.L., Moyer, M.P., and Rao, M.C. (1998). Cl<sup>-</sup> transport in an immortalized human epithelial cell line (NCM460) derived from the normal transverse colon. *Am. J. Physiol.* *275*, C1048–C1057.
35. Liu, W., Wang, Y., Bozi, L.H.M., Fischer, P.D., Jedrychowski, M.P., Xiao, H., Wu, T., Darabedian, N., He, X., Mills, E.L., et al. (2023). Lactate regulates cell cycle by remodelling the anaphase promoting complex. *Nature* *616*, 790–797.
36. Yuan, X., Duan, Y., Xiao, Y., Sun, K., Qi, Y., Zhang, Y., Ahmed, Z., Moiani, D., Yao, J., Li, H., et al. (2022). Vitamin E Enhances Cancer Immunotherapy by Reinvigorating Dendritic Cells via Targeting Checkpoint SHP1. *Cancer Discov.* *12*, 1742–1759.
37. Dixit, A., and Kalia, J. (2023). Protein-Metabolite Interactions: Discovery and Significance. *Chembiochem* *24*, e202200755.
38. Nyul, T.E., Beyries, K., Hojnacki, T., Glynn, R., Paulosky, K.E., Gedela, A., Majer, A., Altman, L., Buckley, K.H., Feng, Z., et al. (2023). Menin Maintains Cholesterol Content in Colorectal Cancer via Repression of LXR-Mediated Transcription. *Cancers* *15*, 4126.
39. Katona, B.W., Glynn, R.A., Hojnacki, T.A., and Hua, X. (2019). Menin: Expanding and dichotomous roles in cancer. *Oncoscience* *6*, 368–370.
40. Katona, B.W., Hojnacki, T., Glynn, R.A., Paulosky, K.E., Szigety, K.M., Cao, Y., Zhang, X., Feng, Z., He, X., Ma, J., and Hua, X. (2020). Menin-mediated Repression of Glycolysis in Combination with Autophagy Protects Colon Cancer Against Small-molecule EGFR Inhibitors. *Mol. Cancer Therapeut.* *19*, 2319–2329.
41. Katona, B.W., Glynn, R.A., Paulosky, K.E., Feng, Z., Davis, C.I., Ma, J., Berry, C.T., Szigety, K.M., Matkar, S., Liu, Y., et al. (2019). Combined Menin and EGFR Inhibitors Synergize to Suppress Colorectal Cancer via EGFR-Independent and Calcium-Mediated Repression of SKP2 Transcription. *Cancer Res.* *79*, 2195–2207.
42. Krivtsov, A.V., Evans, K., Gadrey, J.Y., Eschle, B.K., Hatton, C., Uckelmann, H.J., Ross, K.N., Perner, F., Olsen, S.N., Pritchard, T., et al. (2019). A Menin-MLL Inhibitor Induces Specific Chromatin Changes and Eradicates Disease in Models of MLL-Rearranged Leukemia. *Cancer Cell* *36*, 660–673.e11.
43. Konstantinopoulos, P.A., Barry, W.T., Birrer, M., Westin, S.N., Cadoo, K.A., Shapiro, G.I., Mayer, E.L., O’Cearbhaill, R.E., Coleman, R.L., Kochupurakkal, B., et al. (2019). Olaparib and  $\alpha$ -specific PI3K inhibitor alpelisib for patients with epithelial ovarian cancer: a dose-escalation and dose-expansion phase 1b trial. *Lancet Oncol.* *20*, 570–580.

## STAR★METHODS

### KEY RESOURCES TABLE

| REAGENT or RESOURCE                                     | SOURCE                    | IDENTIFIER                                            |
|---------------------------------------------------------|---------------------------|-------------------------------------------------------|
| <b>Antibodies</b>                                       |                           |                                                       |
| Rabbit monoclonal antibody anti-N-cadherin              | Cell Signaling Technology | Cat# 13116; RRID: AB_2687616                          |
| Mouse monoclonal antibody anti-E-cadherin               | Cell Signaling Technology | Cat# 14472; RRID: AB_2728770                          |
| Rabbit monoclonal antibody anti-Vimentin                | Cell Signaling Technology | Cat# 5741; RRID: AB_10695459                          |
| Rabbit monoclonal antibody anti-CD9                     | Cell Signaling Technology | Cat# 13174; RRID: AB_2798139                          |
| Rabbit monoclonal antibody anti-CD63                    | Cell Signaling Technology | Cat# 52090; RRID: AB_2924771                          |
| Rabbit monoclonal antibody anti-CD81                    | Cell Signaling Technology | Cat# 10037; RRID: AB_2714207                          |
| Rabbit monoclonal antibody anti-cPLA2 pS505             | Cell Signaling Technology | Cat# 53044; RRID: AB_2799425                          |
| Rabbit monoclonal antibody anti-cPLA2                   | Cell Signaling Technology | Cat# 5479; RRID: AB_10621243                          |
| Mouse monoclonal antibody anti-Ubiquitin                | Cell Signaling Technology | Cat# 3936; RRID: AB_331292                            |
| Rabbit monoclonal antibody anti-FBW7                    | Proteintech               | Cat# 28424-1-AP; RRID: AB_2881138                     |
| Rabbit monoclonal antibody anti-PDK1 pS241              | Cell Signaling Technology | Cat# 3061; RRID: AB_2161919                           |
| Rabbit monoclonal antibody anti-PDK1                    | Cell Signaling Technology | Cat# 5662; RRID: AB_10839264                          |
| Rabbit monoclonal antibody anti-AKT pT308               | Cell Signaling Technology | Cat# 4056; RRID: AB_331163                            |
| Rabbit monoclonal antibody anti-AKT                     | Cell Signaling Technology | Cat# 9272; RRID: AB_329827                            |
| Rabbit monoclonal antibody anti-SGK3                    | Cell Signaling Technology | Cat# 8156; RRID: AB_10949507                          |
| Rabbit monoclonal antibody anti-Pin1                    | Cell Signaling Technology | Cat# 3722; RRID: AB_10692654                          |
| Rabbit Polyclonal antibody anti-PTEN                    | Cell Signaling Technology | Cat# 9559; RRID: AB_390810                            |
| Rabbit monoclonal antibody anti-PCNA                    | Cell Signaling Technology | Cat# 13110; RRID: AB_2636979                          |
| Rabbit monoclonal antibody anti-Cyclin D1               | Cell Signaling Technology | Cat# 55506; RRID: AB_1661033                          |
| Rabbit monoclonal antibody anti-PKC $\zeta$ pT410       | Affinity                  | Cat# AF3404; RRID: AB_2834787                         |
| Rabbit monoclonal antibody anti-PKC $\zeta$             | Proteintech               | Cat# 26899-1-AP; RRID: AB_2880675                     |
| Rabbit monoclonal antibody anti-H3K4me3                 | Cell Signaling Technology | Cat# 9783; Tri-Methyl Histone H3 Antibody Sampler Kit |
| Rabbit monoclonal antibody anti-H3K9me3                 | Cell Signaling Technology | Cat# 9783; Tri-Methyl Histone H3 Antibody Sampler Kit |
| Rabbit monoclonal antibody anti-H3K27me3                | Cell Signaling Technology | Cat# 9783; Tri-Methyl Histone H3 Antibody Sampler Kit |
| Rabbit monoclonal antibody anti-H3K36me3                | Cell Signaling Technology | Cat# 9783; Tri-Methyl Histone H3 Antibody Sampler Kit |
| Rabbit monoclonal antibody anti-H3K79me3                | Cell Signaling Technology | Cat# 9783; Tri-Methyl Histone H3 Antibody Sampler Kit |
| Rabbit monoclonal antibody anti-H3K9ac                  | Cell Signaling Technology | Cat# 9927; Acetyl-Histone H3 Antibody Sampler Kit     |
| Rabbit monoclonal antibody anti-H3K14ac                 | Cell Signaling Technology | Cat# 9927; Acetyl-Histone H3 Antibody Sampler Kit     |
| Rabbit monoclonal antibody anti-H3K18ac                 | Cell Signaling Technology | Cat# 9927; Acetyl-Histone H3 Antibody Sampler Kit     |
| Rabbit monoclonal antibody anti-H3K27ac                 | Cell Signaling Technology | Cat# 9927; Acetyl-Histone H3 Antibody Sampler Kit     |
| Rabbit monoclonal antibody anti-H3K56ac                 | Cell Signaling Technology | Cat# 9927; Acetyl-Histone H3 Antibody Sampler Kit     |
| Rabbit monoclonal antibody anti-Histone H3              | Cell Signaling Technology | Cat# 9927; Acetyl-Histone H3 Antibody Sampler Kit     |
| Rabbit monoclonal antibody anti-GAPDH                   | Abcam                     | Cat# 2251-1; RRID: AB_1267174                         |
| Rabbit monoclonal anti-Ubiquitin (linkage-specific K27) | Abcam                     | Cat# ab181537; RRID: AB_2713902                       |

(Continued on next page)

**Continued**

| REAGENT or RESOURCE                                     | SOURCE                    | IDENTIFIER                                    |
|---------------------------------------------------------|---------------------------|-----------------------------------------------|
| Rabbit monoclonal anti-Ubiquitin (linkage-specific K48) | Abcam                     | Cat# ab140601; RRID: AB_2783797               |
| Rabbit monoclonal antibody anti-Pan-PhosphoThreonine    | Novus Biologicals         | Cat# NBP1-77696; RRID: AB_11041099            |
| Rabbit monoclonal antibody anti-MLL1 (Amino-terminal)   | Cell Signaling Technology | Cat# 14689; RRID: AB_2688009                  |
| Rabbit polyclonal antibody anti-MLL2 (Amino-terminal)   | Cell Signaling Technology | Cat# 47097                                    |
| Rabbit monoclonal antibody anti-WDR5                    | Cell Signaling Technology | Cat# 25501; SET1/COMPASS Antibody Sampler Kit |
| Rabbit monoclonal antibody anti-Ash2L                   | Cell Signaling Technology | Cat# 5019; RRID: AB_1950350                   |
| Rabbit monoclonal antibody anti-RbBP5                   | Cell Signaling Technology | Cat# 13171; RRID: AB_2714169                  |
| Rabbit monoclonal antibody anti-CFP1                    | Cell Signaling Technology | Cat# 40672; RRID: AB_2799181                  |
| Rabbit monoclonal antibody anti-WDR82                   | Cell Signaling Technology | Cat# 25501; SET1/COMPASS Antibody Sampler Kit |
| Rabbit monoclonal antibody anti-Menin                   | Abcam                     | Cat# ab92443; RRID: AB_10564144               |
| Rabbit monoclonal antibody anti-Set1a                   | Cell Signaling Technology | Cat# 25501; SET1/COMPASS Antibody Sampler Kit |
| Rabbit monoclonal antibody anti-Set1b                   | Cell Signaling Technology | Cat# 25501; SET1/COMPASS Antibody Sampler Kit |
| Rabbit monoclonal antibody anti-FLAG                    | Cell Signaling Technology | Cat# 14793; RRID: AB_2572291                  |
| Rabbit polyclonal antibody anti-GFP                     | Abcam                     | Cat# ab290; RRID: AB_303395                   |
| Rabbit monoclonal antibody anti-mCherry                 | Cell Signaling Technology | Cat# 43590                                    |
| Rabbit monoclonal antibody anti-pan-PhosphoSerine       | ABclonal                  | Cat# AP0932; RRID: AB_2863844                 |
| Rabbit polyclonal antibody anti-IgG                     | Cell Signaling Technology | Cat# 2729; RRID: AB_1031062                   |

**Biological samples**

|                                     |                                                  |     |
|-------------------------------------|--------------------------------------------------|-----|
| Human primary CRC tissue microarray | Affiliated Hospital of Jining Medical University | N/A |
|-------------------------------------|--------------------------------------------------|-----|

**Chemicals, peptides, and recombinant proteins**

|                              |                |                 |
|------------------------------|----------------|-----------------|
| Anti-Flag Affinity Gel       | Bimake         | Cat# B23101     |
| Azoxymethane (AOM)           | MP Biomedicals | Cat# 25843-45-2 |
| Dextran Sodium Sulfate (DSS) | MP Biomedicals | Cat# 9011-18-1  |
| DNase I                      | GLPBIO         | Cat# GC19804    |
| RNase                        | Biomed         | Cat# SH459-1g   |
| Proteinase K                 | Biomed         | Cat# SH458-01   |
| VTP50469                     | Selleck        | Cat# S8934      |
| Alpelisib/BYL719             | Selleck        | Cat# S2814      |
| MM-102                       | Selleck        | Cat# S7265      |
| 740 Y-P                      | Selleck        | Cat# S7865      |
| GDC0068                      | Selleck        | Cat# S2808      |
| Cycloheximide (CHX)          | Selleck        | Cat# S7418      |
| Cisplatin                    | GLPBIO         | Cat# GC11908    |
| 5-Fluorouracil               | Selleck        | Cat# S1209      |
| MG132                        | GLPBIO         | Cat# GC10383    |
| IPTG                         | Biomed         | Cat# SH401-01   |
| Arachidonic acid (AA)        | GLPBIO         | Cat# GC31725    |
| Arachidonyl alcohol (ADA)    | GLPBIO         | Cat# GC39340    |
| Anandamide (ANA)             | GLPBIO         | Cat# GC35339    |
| DAPI                         | Sigma-Aldrich  | Cat# D9542      |
| Corn oil                     | Sigma-Aldrich  | Cat# C8267      |

**Critical commercial assays**

|                               |         |             |
|-------------------------------|---------|-------------|
| USER cloning system           | NEB     | Cat# M5505L |
| Site-Directed Mutagenesis Kit | Agilent | Cat# 200523 |

(Continued on next page)

**Continued**

| REAGENT or RESOURCE                            | SOURCE                      | IDENTIFIER           |
|------------------------------------------------|-----------------------------|----------------------|
| Immunohistochemistry Application Solutions Kit | Cell Signaling Technology   | Cat# 13079           |
| His-tag Protein Purification Kit               | QUALITYARD                  | Cat# QYP1062         |
| PrimeScript RT Reagent Kit                     | TAKARA                      | Cat# RR037A          |
| ChIP assay kit                                 | Beyotime                    | Cat# P2078           |
| ATAC-seq Kit                                   | Novoprotein scientific Inc. | Cat#N248             |
| Mycoplasma Detection Kit                       | Yeasen                      | Cat# 40601ES20       |
| <i>in vitro</i> Ubiquitinylation kit           | ENZO                        | Cat# BML-UW9920-0001 |

Experimental models: Cell lines

|                          |                   |                     |
|--------------------------|-------------------|---------------------|
| Human: 293T              | ATCC              | Cat# CRL-3216       |
| Human: DLD1              | ATCC              | Cat# CRL-1932       |
| Human: HCT116            | ATCC              | Cat# HTB-46         |
| DLD1 <sup>E545K</sup>    | Horizon Discovery | Cat# HD-105-012     |
| DLD1 <sup>WT</sup>       | Horizon Discovery | Cat# HD-105-001     |
| HCT116 <sup>H1047R</sup> | Horizon Discovery | Cat# HD-104-012     |
| HCT116 <sup>WT</sup>     | Horizon Discovery | Cat# HD-104-007     |
| Human: PCE               | iCell Bioscience  | Cat# HUM-iCell-d010 |
| Human: NCM460            | iCell Bioscience  | Cat# iCell-h373     |

Experimental models: Organisms/strains

|                                          |                                                                  |                                    |
|------------------------------------------|------------------------------------------------------------------|------------------------------------|
| Mouse: C57BL/6J                          | Experimental Animal Research Center of Jining Medical University | N/A                                |
| Mouse: NVSG                              | Experimental Animal Research Center of Jining Medical University | N/A                                |
| Mouse: BALB/c-nu                         | Experimental Animal Research Center of Jining Medical University | N/A                                |
| <i>R26-Pik3ca</i> <sup>H1047R</sup> mice | The Jackson Laboratory                                           | Cat# 016977, RRID: IMSR_JAX:016977 |

Oligonucleotides used in this paper, see Table S10

Recombinant DNA

|                              |            |     |
|------------------------------|------------|-----|
| pCMV GFP                     | This paper | N/A |
| pCMV mCherry                 | This paper | N/A |
| pCMV 3×FLAG-FBW7 WT          | This paper | N/A |
| pCMV 3×FLAG-FBW7 T205A       | This paper | N/A |
| pCMV 3×FLAG-FBW7 T680A       | This paper | N/A |
| pCMV 3×FLAG-FBW7 T692A       | This paper | N/A |
| pCMV 3×FLAG-FBW7 T695A       | This paper | N/A |
| pCMV 3×FLAG-RbBP5 WT         | This paper | N/A |
| pCMV 3×FLAG-WDR82 WT         | This paper | N/A |
| pCMV 3×FLAG-CFP1 WT          | This paper | N/A |
| pCMV 3×FLAG-Menin WT         | This paper | N/A |
| pCMV 3×FLAG-WDR5 WT          | This paper | N/A |
| pCMV 3×FLAG-Ash2L WT         | This paper | N/A |
| pET-28a-Menin WT             | This paper | N/A |
| pET-28a-Menin Y323A          | This paper | N/A |
| pFastBac1-Flag-cPLA2         | This paper | N/A |
| pFastBac1-His-FBW7           | This paper | N/A |
| pET-28a-FLAG-MLL1 N-Terminal | This paper | N/A |

Deposited data

|                      |                  |     |
|----------------------|------------------|-----|
| RNA-Sequencing data  | [GSA]: HRA004872 | N/A |
| ATAC-sequencing data | [GSA]: HRA005039 | N/A |

(Continued on next page)

**Continued**

| REAGENT or RESOURCE                                                 | SOURCE            | IDENTIFIER |
|---------------------------------------------------------------------|-------------------|------------|
| The low depth whole genome sequencing data for copy-number analysis | [GSA]: HRA005040  | N/A        |
| The Infinium Methylation EPIC Kit Beadchip (850K) data              | [GSA]: OMIX003990 | N/A        |
| ChIP-sequencing data                                                | [GSA]: HRA004948  | N/A        |

**RESOURCE AVAILABILITY**

**Lead contact**

Further information and requests for resources and reagents should be directed to and will be fulfilled by the lead contact, Bin Zhang ([zhangbin@mail.jnmc.edu.cn](mailto:zhangbin@mail.jnmc.edu.cn)).

**Materials availability**

Further information and requests for resources and reagents should be directed to and will be fulfilled by the [lead contact](#), Bin Zhang ([zhangbin@mail.jnmc.edu.cn](mailto:zhangbin@mail.jnmc.edu.cn)) with a completed Materials Transfer Agreement.

**Data and code availability**

Original/source data of RNA-sequencing (accession number: HRA004872), ATAC-sequencing (accession number: HRA005039), the low depth whole genome sequencing data for copy-number analysis (accession number: HRA005040), the Infinium Methylation EPIC Kit Beadchip (850K) (accession number: OMIX003990) and ChIP-sequencing (accession number: HRA004948) are deposited in the Genome Sequence Archive (GSA, <https://ngdc.cncb.ac.cn/gsa/>).

This study did not report new original code. Any additional information required to reanalyze the data reported in this paper is available from the [lead contact](#) upon request.

**EXPERIMENTAL MODEL AND SUBJECT PARTICIPANT DETAILS**

**Human subjects**

Human primary CRC specimens for the PDX model ( $n = 4$ ) and tissue microarray ( $n = 80$ ) were obtained with informed consent from the Affiliated Hospital of Jining Medical University. None of the patients had received preoperative radiation or chemotherapy. The study was approved by the Research Ethics Committee of the Affiliated Hospital of Jining Medical University and conducted in accordance with the Declaration of Helsinki (No. 2022B012). Prior to inclusion in the study, participants provided written informed consent. The clinical characteristics and pathological information of the subjects from the primary CRC specimens are listed in [Table S11](#).

**Mice**

All animal experiments were conducted in compliance with the protocols approved by the Animal Ethics Committee of the Affiliated Hospital of Jining Medical University (No. 2022B012).

**The Direct Education Model**

For the Direct Education Model, GFP-expression vectors (Green) and mCherry-expression vectors (Red) were stably transfected into tumor cells (PIK3CA mutant or isogenic WT cells) and colon epithelial cells (NCM460 or PCE cells), respectively. Subsequently, a mixture of GFP-labeled tumor cells (PIK3CA mutant or isogenic WT tumor cells) and mCherry-labeled colon epithelial cells (NCM460 or PCE cells) at the indicated ratio was subcutaneously injected into athymic BALB/c nude mice. As a control group, pure GFP-labeled PIK3CA mutant tumor cells, pure GFP-labeled PIK3CA WT cancer cells, or pure mCherry-labeled colon epithelial cells were inoculated into the mice. Tumor incidence was evaluated, and tumor volume was measured at designated time points using the formula  $\text{length} \times \text{width}^2 / 2$ . Approximately 30 days later, xenograft tumors were excised, trypsinized, and isolated using the Flow Cytometry Cell Sorting Procedure. The isolated GFP-labeled tumor cells and mCherry-labeled colon epithelial cells were cultured and subjected to *in vitro* and *in vivo* functional assays as outlined in [Figure 1A](#).

**The Far-end Education Model**

In the Far-end Education Model, PIK3CA mutant or isogenic WT tumor cells were randomly inoculated subcutaneously on one side of athymic BALB/c nude mice, while NCM460 cells were simultaneously injected on the opposite side of the mice. In the control group, NCM460 cells were inoculated on both sides of the mice. Tumor incidence and volume were evaluated. Approximately 30 days later, xenograft tumors were collected, cut into 5 mm<sup>3</sup> fragments, and implanted as intact tumor tissue subcutaneously

into new nude mice to establish the F2 xenofraft derived xenograft (XDX) model, as indicated in Figure 1E. Tumor incidence and volume were assessed.

### The colon orthotopic cancer model

In the orthotopic mouse colon cancer model, isolated DLD1<sup>WT</sup> cells, DLD1<sup>E545K</sup> educated-NCM460 cells, and DLD1<sup>WT</sup> educated-NCM460 cells were stably transfected with the Firefly D-Luciferin expression vector. NVSG severe immunodeficiency mice were anesthetized with chloral hydrate. A midline incision was made in the abdominal cavity of the mice. Using a sterilized micro syringe, a 30- $\mu$ L cell suspension containing 500 thousand indicated cells (pre-mixed with matrix) was gently injected into the distal colon. The incisions were closed with 6-0 nylon sutures. After two weeks, tumor imaging was conducted using the FluorVivo imaging system (INDEC Biosystems, Santa Clara, CA, USA). Survival analysis was performed based on the mice's survival status and time. Finally, the mice were dissected, and the number of metastatic nodules in the rectum, liver, and spleen was examined and analyzed through H&E staining.

### The tail vein injection metastasis model

In the tail vein injection mouse model, one million indicated cells were injected into the tail vein of athymic BALB/c nude mice ( $n = 8$  per group). Three groups were established: DLD1<sup>WT</sup> group, DLD1<sup>E545K</sup>-educated NCM460 group, and DLD1<sup>WT</sup>-educated NCM460 group. Tumors were visualized using the FluorVivo imaging system, and the survival of the mice was assessed. Finally, the mice were dissected, and metastatic nodules in the lungs were examined and analyzed through H&E staining.

### The AOM/DSS-induced colorectal tumorigenesis model

The AOM/DSS-induced colorectal tumorigenesis model was established according to the following protocol. Mice were intraperitoneally injected with AOM (10 mg/kg body weight; MP Biomedicals) on the first day. Subsequently, the mice were maintained on a regular water and diet regimen for one week. Following this, the mice were given 2.5% DSS (MP Biomedicals) in their drinking water for one week, followed by a week of normal water. This cycle was repeated three times. The mice's body weight was measured weekly throughout the experiment. At the end of 100 days, the mice were sacrificed, and their colons were removed for further analysis. Each colon was longitudinally cut open, and tumor numbers were examined.

### Generation of transgenic R26-Pik3ca<sup>H1047R</sup> mice

A construct consisting of a splice acceptor site, a floxed transcriptional stop cassette and a mutant mouse Pik3ca cDNA, encoding for a histidine 1047 arginine substitution, was inserted into intron 1 via homologous recombination. The H1047R Pik3ca mutant allele was targeted to intron 1 of the Gt(ROSA)26Sor gene behind a floxed PGK-Neo stop cassette. This mutation was created in 129S6/SvEvTac-derived W4 embryonic stem (ES) cells. G418-resistant clones were isolated, expanded, and screened by Southern blot. Resultant mice were backcrossed to FVB for 12 generations. Taqman qPCR protocols are run on a real-time PCR instrument. The transgene genotype is determined by comparing  $\Delta$ Ct values of each unknown sample against known homozygous and hemizygous controls, using appropriate endogenous references. Genotyping primers and probs were listed in Supplemental Table S10.

### CRC PDX tumors

Mouse PDX experiments were conducted following approved protocols and ethical guidelines set by the Institutional Animal Care and Use Committee (IACUC). Four primary human colorectal cancer tumor fragments (2–3 mm in diameter) harboring WT (2 cases) or mutant (E545K and H1047R) PIK3CA were inoculated subcutaneously into the 6-week-old female immunodeficient BALB/c nude mice. Patients with CRC had not received any previous treatments or procedures. For animal drug treatment, alpelisib was dissolved in a solvent solution containing 5% DMSO, 50% PEG-300, 5% Tween-80, and 40% ddH<sub>2</sub>O. VTP50469 was dissolved in corn oil with 5% DMSO. Once the PDX tumors reached sizes of 100–150 mm<sup>3</sup>, the mice were randomly divided into four groups (8 mice per group): vehicle group, alpelisib group (12.5 mg/kg, oral gavage, once daily), VTP50469 group (50 mg/kg, oral gavage, once daily), and alpelisib plus VTP50469 group.

### Cell culture and transfection

The human CRC cell line DLD1 carries a heterozygous E545K mutation (DLD1<sup>WT/E545K</sup>), while HCT116 possesses a heterozygous H1047R mutation (HCT116<sup>WT/H1047R</sup>). Isogenic derivatives of these cell lines were utilized, in which either the WT or mutant allele of PIK3CA was knocked out. Clones in which the mutant allele was disrupted (with the WT allele intact) were designated as DLD1<sup>WT</sup> or HCT116<sup>WT</sup>, while clones in which only the WT allele was disrupted (with the mutant allele intact) were designated as DLD1<sup>E545K</sup> or HCT116<sup>H1047R</sup>.

Human CRC cell line including DLD1, DLD1<sup>WT</sup>, DLD1<sup>E545K</sup>, HCT116, HCT116<sup>WT</sup> and HCT116<sup>H1047R</sup> and Human normal colon epithelial cell line NCM460 was cultured in McCoy's 5A medium (Gibco) supplemented with 10% fetal bovine serum (Gibco). Human primary colonic epithelial (PCE) cells were cultured in DMEM/F12 (1:1) medium containing 10% FBS, 10 ng/mL cholera toxin, 0.005 mg/mL insulin, 0.005 mg/mL transferrin, 100 ng/mL hydrocortisone, and 20 ng/mL human recombinant EGF. Human embryonic kidney HEK 293T cells were cultured in DMEM medium (Sigma) supplemented with 10% FBS. All culture media were supplemented with 1% penicillin/streptomycin. Cells were incubated at 37°C in a humidified atmosphere with 5% CO<sub>2</sub>. Regular testing for

Mycoplasma contamination was performed (Yeasen). The cell lines were authenticated by Genetica DNA Laboratories using STR profiling. Transfection was carried out using Lipofectamine 3000 reagent (Life Technologies) following the manufacturer's instructions.

### METHOD DETAILS

#### Immunohistochemistry and immunofluorescence analyses

Immunohistochemistry (IHC) and immunofluorescence (IF) were conducted following standard protocols. Briefly, paraffin-embedded mouse and human tissues were deparaffinized in xylene and subjected to antigen retrieval by boiling the samples for 30 min in a standard 10 mM citric acid pH 6 buffer. The samples were then incubated with the designated primary antibodies overnight at 4°C. The primary antibodies used were rabbit anti-cPLA2 (1:200 for IHC, Cell Signaling Technology), rabbit anti-FBW7 (1:200 for IHC, Novus), rabbit anti-GFP (1:200 for IF, Abcam), and rabbit anti-mCherry (1:200 for IF, Cell Signaling Technology). The peroxidase-conjugated secondary antibodies used for HRP IHC were mouse or rabbit EnVision+ (DAKO), while anti-rabbit or anti-mouse Alexa 488, 568, or 647 IgG (1:500, Invitrogen) were used for immunofluorescence. IHC sections were dehydrated, cleared, and mounted with DPX (Sigma), while immunofluorescence sections were mounted in Hydromount (National Diagnostics) with DAPI for nuclear staining. In the case of IHC, the tissue slides were independently examined by two investigators. Protein expression was quantified using a visual grading system based on the extent of staining (percentage of positive tumor cells on a scale of 0–4: 0, none; 1, 1–25%; 2, 26–50%; 3, 51–75%; 4, >75%) and the intensity of staining (graded on a scale of 0–3: 0, no staining; 1, weak staining; 2, moderate staining; 3, strong staining). The product of the extent and intensity grades was used to determine the protein expression level. Immunostainings and imaging were conducted on a minimum of three biological replicates, and representative images from the replicates are included in the manuscript.

#### DNA constructs and mutagenesis

The plasmids used in this study and the primers for vector construction are listed in [Table S10](#). Briefly, pCMV backbones (pCMV FLAG-RbBP5, FLAG-WDR82, FLAG-WDR5, FLAG-CFP1, FLAG-Menin, FLAG-Ash2L and FLAG-FBW7) were utilized for gene expression in mammalian cells using the USER cloning system or molecular cloning technology. The LentiCRISPR V2 backbone (Addgene) was employed for cPLA2 and FBW7 knock-out (KO) in cells. Point mutations (FBW7 T205A, T680A, T692A, and T695A) in the constructs were introduced using a QuikChange Site-Directed Mutagenesis Kit. The pAAV-loxP-Neo vector was used for homologous recombination of endogenous Menin (Y323A) knock-in (KI) mutations. The pET-28a vector was utilized to obtain pure bioactive Menin WT and Y323A, Flag-MLL1 N-terminal proteins.

#### CRISPR/CAS9 genome editing

Three different guide RNA pairs for cPLA2 or FBW7 knock-out were designed using the IDT design tool (<https://sg.idtdna.com/pages>) and individually cloned into the lentiCRISPRv2 vector. DLD1 cells were transfected with these vectors. After 48 h, the cells were trypsinized and stable clones were selected using 1.5 μg/mL puromycin (Invitrogen) for 2 weeks. Knock-out of cPLA2 or FBW7 was screened using genomic PCR and validated by western blot.

For CRISPR/CAS9-mediated Menin Y323A point mutation on the endogenous Menin locus, three different guide RNA pairs surrounding the Y323 sites of the Menin locus were designed and cloned. The homologous arms of the Y323 target sites were mutated and cloned into the pAAV-loxP-Neo vector. Targeting vectors were co-transfected with individual gRNA vectors into NCM460 cells. Menin Y323A knock-in mutated cell clones were screened by genomic PCR and verified by genomic DNA sequencing.

#### Isolation and purification of exosomes and treatment

Exosomes were purified by differential centrifugation processes using the following methods. For cell culture supernatant derived exosomes, the cell lines were cultured until 80% confluence, washed twice with PBS, and serum-free media was added to the cells. For exosome isolation, serum-free media consisted of DMEM (Gibco) supplemented with 1% nonessential amino acids (Corning), 1% L-glutamine (Corning), and 1% penicillin-streptomycin. Supernatant was collected from cells that were cultured in the conditioned medium for 48 h, and was subsequently subjected to sequential centrifugation steps at 800g for 5min, and 2,000g for 10min. The supernatant was then filtered using 0.2 μm filters (Corning). Exosomes were pelleted by ultracentrifugation (Beckman) at 100,000g in an SW32 Ti rotor for 3 h. The supernatant was aspirated and the pellet was resuspended in PBS. The size and concentration of exosomes was verified using NTA (Malvern NanoSight LM10) and manufacturer's software.

For treatment of exosomes with DNase, purified exosomes were incubated (37°C for 30 min) with 5 mg/ml of DNase I (GLPBIO), followed by heat inactivation (65°C for 30 min). For RNase treatment, purified exosomes were incubated (37°C for 30 min) with 2 mg/mL of protease-free RNase A (Biomed) followed by addition of 10× concentrated RNase inhibitor (GLPBIO). For proteinase treatment, purified exosomes were incubated (37°C for 30 min) with 5 mg/ml of proteinase K (Biomed, dissolved in RNase-free water) followed by heat inactivation (60°C for 30 min).

#### RNA extraction and quantitative real-time PCR analysis

Total RNA was extracted and purified using TRIzol (Invitrogen) following the manufacturer's instructions. Reverse transcription of 1 μg of total RNA was performed using the PrimeScript RT Reagent Kit (TaKaRa, Japan). The gene expression levels were quantified



using a quantitative real-time PCR system (Qiagen, Germany). GAPDH was used as the reference gene to normalize all gene expression results. All reactions were performed in triplicate and repeated in three independent experiments. The average of three independent analyses for each gene was calculated. Fold changes were determined through relative quantification ( $2^{-\Delta\Delta Ct}$ ). The qRT-PCR primer sequences are provided in [Table S10](#).

### Cell viability assay and colony formation

To assess cell viability,  $2 \times 10^3$  cells were seeded in 200  $\mu$ L of medium in 96-well plates. Subsequently, 20- $\mu$ L of CCK-8 reagent (Dojindo, Japan) was added to each well. Following an incubation period of 2–4 h at 37°C, the absorbance at 450 nm was measured for each sample well using a plate reader. Cell viability was measured over a period of 5 consecutive days, and the absorbance at OD450 was utilized to generate cell growth curves. For the colony formation assay, 1000 cells in 2 mL medium were seeded into six-well plates and cultured for 7–12 days. Cell colonies were then successively fixed, stained, and counted.

### Spheroid formation assay

Differentially treated NCM460 cells were seeded into 6-well plates at indicated densities and were grown in a serum-free medium consisting of H-DMEM basal media, 20 ng/mL EGF, 10 ng/mL bFGF, and 2% B27 (Gibco). In addition to culturing cells in serum-free media, spheroid cells were obtained using low adhesion tissue culture plates (Corning). The number of spheroids per well was counted under a light microscope at 40 $\times$  magnification. The experiments were performed at least three times.

### Invasion assay

*in vitro* invasion assay was performed using transwell chambers using the following methods. First, cells at logarithmic phase were trypsinized and resuspended in serum-free medium. A 100- $\mu$ L cell suspension was added to the upper chamber (8.0 mM pore size, Corning), and medium supplemented with 20% FCS was added to the bottom chamber. Then, cells on the upper surface of filters were removed after 48 h, and those on the undersurface were stained with 5% crystal violet. Images were captured from each membrane, and the number of invasive cells was counted under a microscope.

### Co-immunoprecipitation

Co-immunoprecipitation (coIP) was conducted using standard protocols. Cells were collected and lysed with IP lysis buffer (containing 50 mM Tris-HCl at pH 7.5, 1 mM EDTA at pH 8.0, 150 mM NaCl, 1% NP-40, cOmplete Protease Inhibitor, PhosSTOP, and PMSF). Protein lysates (1 mg) were incubated overnight at 4°C on a rotator with the specified primary antibodies (5 mg). Subsequently, 40  $\mu$ L of Protein A/G agarose beads were added, and the mixture was incubated for an additional 4 h on a rotator at 4°C. The beads and immunocomplexes were then washed with IP buffer, boiled with sample-loading buffer, and analyzed by western blotting.

### In-vitro cPLA2 ubiquitination assay

*in vitro* cPLA2 ubiquitination assays were performed using *in vitro* ubiquitination kit (Enzo Life Sciences, BMLUW9920-0001) following the manufacturer's instructions. In brief, the assay was performed in 50  $\mu$ L reaction volume with the following components: 2  $\mu$ g of recombinant ubiquitin, 100 nM E1, 2.5  $\mu$ M E2 (a mixture of E2 enzymes: UbcH1, UbcH2, UbcH3, UbcH5a, UbcH5b, UbcH5c, UbcH6, UbcH7, UbcH8, UbcH10, UbcH13), 100 ng of purified Flag-cPLA2, and 1  $\mu$ g His-FBW7. Following the reaction, the samples were analyzed by anti-Flag agarose beads immunoprecipitation and subsequent western blot.

### In-vitro binding assay

The vectors expressing 6 $\times$  His-Menin WT and 6 $\times$  His-FLAG-MLL1 N-terminal truncated proteins were constructed and expressed in *E. coli* cells. These recombinant proteins were subsequently purified using Ni-NTA agarose beads, following established procedures. For the *in vitro* binding experiment, 100 ng of purified 6 $\times$  His-Menin WT proteins were incubated with purified 6 $\times$  His-Flag-MLL1 N-terminal truncated proteins in 1 mL of IP buffer at 4°C for 4 h. The coIP assay was conducted using standard protocols, and the protein-bound beads were washed three times for subsequent western blot analysis.

### Western blot

Western blot analysis was conducted using standard techniques. Proteins were separated by 10% SDS-PAGE gel electrophoresis and subsequently transferred to PVDF membranes (Millipore). The membranes were blocked with 5% BSA for 1 h and then sequentially incubated with the appropriate primary antibodies and horseradish peroxidase-conjugated secondary antibodies. The signals were detected using an ECL Substrate Kit (Thermo Scientific). GAPDH antibody was utilized as a loading control for whole cell lysate.

### Untargeted metabolomics analysis

#### Metabolite extraction

For cultured cells, approximately  $10^7$  cells were harvested and 800  $\mu$ L of cold methanol/acetonitrile (1:1, v/v) was added to remove proteins and extract metabolites. For human or mice tissue samples, approximately 1.0 g of tissue was crushed, and 800  $\mu$ L of cold methanol/acetonitrile (1:1, v/v) was used for metabolite extraction. The mixture was transferred to a new centrifuge tube and centrifuged at 14,000 g for 5 min at 4°C to collect the supernatant. For liquid samples, including medium, exosomes, exosome-free

medium, and serum, 400  $\mu$ L of cold extraction solvent methanol/acetonitrile/water (2:2:1, v/v/v) was added to 500  $\mu$ L of the sample and thoroughly vortexed. After vortexing, the samples were incubated on ice for 20 min, followed by centrifugation at 14,000 g for 20 min at 4°C. The supernatant was collected, and the remaining solution was dried using a vacuum centrifuge at 4°C. For LC-MS analysis, the dried samples were re-dissolved in 100  $\mu$ L of acetonitrile/water (1:1, v/v) solvent and transferred to LC vials.

#### LC-MS analysis

For the analysis of polar metabolites in untargeted metabolomics, extracts were subjected to analysis using a Sciex TripleTOF 6600 quadrupole time-of-flight mass spectrometer. The mass spectrometer was coupled to hydrophilic interaction chromatography via electrospray ionization. LC separation was performed on an ACQUITY UPLC BEH Amide column (2.1 mm  $\times$  100 mm, 1.7  $\mu$ m particle size, Waters, Ireland) using a gradient of solvent A (25 mM ammonium acetate and 25 mM ammonium hydroxide in water) and solvent B (acetonitrile). The gradient started at 85% B for 1 min and was linearly decreased to 65% B over 11 min. Subsequently, it was reduced to 40% B in 0.1 min and maintained for 4 min, followed by an increase to 85% B in 0.1 min. A 5 min re-equilibration period was employed. The flow rate was set at 0.4 mL/min, the column temperature was maintained at 25°C, the autosampler temperature was 5°C, and the injection volume was 2  $\mu$ L. The mass spectrometer was operated in both negative ion and positive ionization modes. The following source conditions were set for electrospray ionization: Ion Source Gas1 (Gas1) at 60, Ion Source Gas2 (Gas2) at 60, curtain gas (CUR) at 30, source temperature at 600°C, and IonSpray Voltage Floating (ISVF) at  $\pm$ 5500 V. During the mass spectrometry acquisition, the instrument was configured to acquire data in the m/z range of 60–1000 Da, and the accumulation time for TOF MS scan was set at 0.20 s per spectra. For auto MS/MS acquisition, the instrument was set to acquire data in the m/z range of 25–1000 Da, and the accumulation time for product ion scan was set at 0.05 s per spectra. The product ion scan was obtained using information-dependent acquisition (IDA) with high sensitivity mode selected. The following parameters were used: a fixed collision energy (CE) of 35 V with  $\pm$ 15 eV, a declustering potential (DP) of 60 V (+) and –60 V (–), exclusion of isotopes within 4 Da, and monitoring of 10 candidate ions per cycle.

#### Data analysis

The raw MS data (wiff.scan files) were first converted to MzXML files using Proteo Wizard MS Convert before being imported into the freely available XCMS software. For peak picking, the following parameters were used: centWave m/z = 25 ppm, peakwidth = c (10, 60), and prefilter = c (10, 100). Peak grouping was performed with bw = 5, mzwid = 0.025, and minfrac = 0.5. In the extracted ion features, only variables with more than 50% nonzero measurement values in at least one group were retained. Compound identification of metabolites was performed using MS/MS spectra with an in-house database established with available authentic standards. After normalizing to total peak intensity, the processed data were uploaded into SIMCA-P (version 14.1, Umetrics, Umea, Sweden) for multivariate data analysis, including Pareto-scaled principal component analysis (PCA) and orthogonal partial least squares discriminant analysis (OPLS-DA). The model's robustness was evaluated using 7-fold cross-validation and response permutation testing. The variable importance in the projection (VIP) value of each variable in the OPLS-DA model was calculated to indicate its contribution to the classification. Significance was determined using an unpaired Student's t-test. A VIP value > 1 and p < 0.05 were considered statistically significant.

#### Quantitative measurement of AA, PGD2 and PGE2 abundance

The homogenate was sonicated on ice for 30 min, and the mixture was then centrifuged for 10 min at 14,000 g and 4°C. 500  $\mu$ L of the supernatant was used to extract metabolites using an HLB elution system. The system was preactivated with 200  $\mu$ L of methanol and equilibrated with 200  $\mu$ L of water. The loaded system was washed successively with 200  $\mu$ L of water and 200  $\mu$ L of 10% methanol aqueous solution, and then eluted with 50  $\mu$ L of acetonitrile. Analyses were performed using an UHPLC system (I-Class LC, Waters) coupled to a QTRAP mass spectrometer (AB Sciex 5500). The mobile phase consisted of solvent A (0.1% formic acid in water) and solvent B (0.1% formic acid in acetonitrile). The samples were kept in the automatic sampler at 4°C, and the column temperature was maintained at 45°C. The gradient was run at a flow rate of 400  $\mu$ L/min, and a 4  $\mu$ L aliquot of each sample was injected. The gradient started at 30% B from 0 to 1 min, then linearly increased to 80% B from 1 to 7 min, further increased to 90% B from 7 to 9 min, and held at 90% B from 9 to 11 min. Quality control (QC) samples were used to test and evaluate the stability and repeatability of the system. In the ESI negative mode, the following conditions were set: source temperature at 450°C, Ion Source Gas1 (Gas1) at 55, Ion Source Gas2 (Gas2) at 60, Curtain gas (CUR) at 30, and IonSpray Voltage Floating (ISVF) at 4500 V. The multiple reaction monitoring (MRM) mode was employed to detect the ion pairs. The Multiquant software was used to extract the chromatographic peak area and retention time. The relative quantitative analysis of each metabolite was based on the peak area.

#### Liquid chromatography-mass spectrometry (LC-MS) analysis for protein identification

The proteins immunoprecipitated with cPLA2 or FBW7 were separated by SDS-PAGE, stained with Coomassie Brilliant Blue, and differentially expressed bands between PIK3CA mutant cells (DLD1<sup>E545K</sup> and HCT116<sup>H1047R</sup>) and isogenic WT cells (DLD1<sup>WT</sup> and HCT116<sup>WT</sup>) and were excised for in-gel trypsin digestion and peptide extraction. The gel slices were subjected to in-gel reduction, alkylation, and overnight trypsinization at 37°C. The peptide samples were then re-dissolved in mobile phase A (2% ACN, 0.1% FA), centrifuged at 20,000 g for 10 min, and the supernatant was collected for further testing. Sample separation was performed using a Thermo UltiMate 3000 UHPLC system. The samples were first enriched and desalted in a trap column, and then separated on a C18 column (75  $\mu$ m inner diameter, 3  $\mu$ m particle size, 25 cm column length) at a flow rate of 300 nL/min. The following gradient was employed: 0–5 min, 5% mobile phase B (98% ACN, 0.1% FA); 5–45 min, linear increase of mobile phase B from 5% to 25%; 45–50 min, increase of mobile phase B from 25% to 35%; 50–52 min, increase of mobile phase B from 35% to 80%; 52–54 min, 80% mobile phase B; 54–60 min, 5% mobile phase B. The nano liquid phase separation endpoint was directly connected to the mass spectrometer.

The liquid phase-separated peptide segments were ionized by a nanoESI source and then entered the Q-Exactive HF X mass spectrometer (Thermo Fisher Scientific, San Jose, CA) for Data Dependent Acquisition (DDA) analysis. The main parameters were set as follows: ion source voltage 1.9 kV, primary mass spectrometry scanning range 350–1,500 m/z, resolution 60,000. The secondary mass spectrum started at a fixed m/z of 100 with a resolution of 15,000. The parent ion screening conditions for secondary fragmentation were as follows: charge 2+ to 6+, peak intensity greater than 10,000, and selection of the top 30 parent ions. Fragmentation was performed using HCD mode, and the fragment ions were detected in the Orbitrap. Dynamic exclusion time was set to 30 s. AGC Settings: Level 1 - 3E6, Level 2 - 1E5. To obtain the iBAQ value for each protein, peptide XIC (extracted ion chromatogram) was used to calculate the peak area using a software developed by BGI Genomics (Shenzhen, China). The iBAQ algorithm was then applied, dividing the total peak area of each proteome by the number of observable peptides in theory to obtain the final iBAQ value. Potential proteins binding with cPLA2 (or FBW7) between PIK3CA mutant and isogenic WT cells were listed in the [Tables S2 and S3](#).

#### **RNA-seq**

RNA was isolated from NCM460 cells treated with DMSO or AA using TRIzol (Invitrogen, USA). Each sample was further purified using an RNeasy Mini Column (Qiagen, Limburg, Netherlands), treated with DNase, and assessed for quality using an Agilent 2100 Bio-analyzer. The samples were then subjected to paired-end sequencing (2 × 100-bp) on an Illumina HiSeq 2000 platform. Read mapping to the human genome (hg19) was performed using TopHat v2.0.11 (<http://tophat.cbcb.umd.edu>) with default options and a TopHat transcript index generated from Ensembl\_GRCh37. To identify differentially expressed genes (DEGs) between the two samples, the expression level of each transcript was calculated using the fragments per kilobase of exon per million mapped reads (FPKM) method. Fold change  $\geq 2.5$  or  $\leq -2.5$  and adjusted p value  $< 0.01$  were the criterion to obtain DEGs. The RNA sequence data have been deposited in the Genome Sequence Archive (GSA, <https://ngdc.cncb.ac.cn/gsa/>) and can be accessed via the GSA Series accession number HRA004872.

#### **ATAC-seq**

ATAC-seq was performed on cell lines following the Omni-ATAC-seq protocol. In brief, fifty thousand viable cells were lysed in a solution containing 10 mM Tris-HCl (pH 7.4), 10 mM NaCl, 3 mM MgCl<sub>2</sub>, and 0.1% Tween 20. The nuclear pellet was then subjected to a transposition reaction using the Nextera DNA Sample Preparation kit (Illumina, no. FC-121-1030) with the addition of 0.01% digitonin and 0.1% Tween 20, incubated at 37°C for 30 min, and subsequently cleaned up using the DNA Clean and Concentrator-5 Kit (Zymo, no. D4014). For quantitative PCR (qPCR), three to six additional cycles of PCR amplification were performed using the NEBNext High-Fidelity 2X PCR Master Mix (NEB, no. M0541L) and Nextera Index Kit (Illumina, no. 15055289). The cleaned-up libraries were quantified and pooled for sequencing by Novogene. The union of peaks was obtained using bedtools merge from ATAC summits. Regions showing log<sub>2</sub> fold changes versus the control of either  $< 1$  or  $> +1$  were considered specific, while those between 1 and +1 were considered shared. ATAC matrices were generated using deepTools computeMatrix with a window of  $\pm 3$  Kbp around the summits. Heatmaps were generated using deepTools plotHeatmap. The raw data have been deposited in Genome Sequence Archive (GSA, <https://ngdc.cncb.ac.cn/gsa/>) and can be accessed under the accession number HRA005039.

#### **Copy number variation (CNV) analysis**

Copy number variation analysis was performed on whole-genome sequencing (WGS) data, which consisted of approximately 10 million sequencing reads. The data processing followed a previously established methodology. Briefly, the sequencing reads were aligned to the human reference genome hg19, and the uniquely mapped reads were sorted and indexed. These uniquely mapped reads were then counted in genomic bins, dividing the genome into 20,000 bins using a known algorithm called Varbin. To normalize the read bin counts across the genome, a circular binary segmentation method was applied. The segmented data were further processed for absolute copy-number quantification using a least-squares fitting algorithm. The parameters of this algorithm were constrained by ploidy values obtained from a previously published algorithm called CELLULOID. The raw data from the copy-number analysis have been deposited in Genome Sequence Archive (GSA, <https://ngdc.cncb.ac.cn/gsa/>) and can be accessed under the accession number HRA005040.

#### **DNA methylation analysis**

Genomic DNA was first restored using the Infinium FFPE DNA Restoration Kit from Illumina. Subsequently, bisulfite conversion was performed using the EZ-96 DNA Methylation Kit from Zymo Research, based in Orange, CA. The methylation analysis was conducted on an Illumina iScan platform using Infinium MethylationEPIC BeadChips, which contained approximately 850,000 methylation markers. Standard protocols were followed during the analysis. For statistical analysis, adjusted p values less than 0.05 were considered indicative of gradual methylation changes. Linear models were employed to quantify the differences in methylation between groups. Functional annotations for the methylation markers were obtained using the Illumina annotation manifest, which included information about Infinium MethylationEPIC BeadChip elements and genes. The raw data from the methylation analysis have been deposited in Genome Sequence Archive (GSA, <https://ngdc.cncb.ac.cn/gsa/>) and can be accessed under the accession number OMIX003990.

#### **ChIP-seq**

NCM460 cells treated with DMSO or AA were fixed, and the ChIP assay kit was used for immunoprecipitation following the manufacturer's instructions. The chromatin was sonicated, and the immunoprecipitation was performed using an anti-H3K4me3 antibody. The immunoprecipitated complex underwent washing, and DNA was extracted and purified using the Universal DNA Purification Kit from Tiangen. For ChIP-seq library preparation, the original Ultra II DNA Library Kits from NEB were used, following the manufacturer's instructions. In the ChIP-seq process, the extracted DNA was ligated to specific adaptors and then subjected to deep

sequencing on the Illumina Novaseq 6000 platform using 150 bp paired-end sequencing. Data analysis was conducted as follows: the raw data in fastq format were initially processed using in-house Perl scripts. This step involved obtaining clean data (clean reads) by removing reads containing adapters, reads containing poly-N, and low-quality reads from the raw data. Additionally, metrics such as Q20, Q30, and GC content were calculated based on the clean data. All subsequent analyses were performed using the high-quality clean data. The clean reads were aligned to the reference genome using Bowtie2 software. Reads originating from organelles, those with mapping quality below 30, and PCR duplicates were removed. The remaining high-quality mapped reads were then subjected to peak calling using Macs2 with a q-value threshold of <0.05. Motif analysis was conducted using the HOMER tool "findMotifsGenome.pl," with the peak file and genome fasta file as input. The tool extracted DNA sequences based on the peak file and compared them with the Motif database to identify motifs. Differential accessible peaks were analyzed in three steps. First, the peak files from each sample were merged using bedtools software. Second, the read counts over the merged peaks were determined for each sample using bedtools multicov. Finally, differential accessible peaks were identified using DESeq2. Regions were considered differentially accessible if the absolute value of the log<sub>2</sub> fold change was greater than 1 and the p value was below 0.05. The ChIP sequence data have been deposited in the Genome Sequence Archive (GSA, <https://ngdc.cncb.ac.cn/gsa/>) and are accessible through the GSA Series accession number HRA004948.

### Trace-level quantitation of ligand-based AA binding with Compass complex subunits

#### The protein immunocomplex preparation

We employed a trace-level AA detection method to assess ligand-based AA binding with Compass complex subunits. To detect AA binding with endogenous subunits (Set1a, Set1b, MLL1, MLL2, RbBP1, WDR82, CFP1, Menin, WDR82, and Ash2L), cells were washed twice with PBS and then scraped into adjusted IP lysis buffer (1% NP-40, 150 mM NaCl, 10 mM Tris at pH 5.9, 1 mM EGTA, 1 mM EDTA, 1.5 mM MgCl<sub>2</sub>, 10 mM KCl, 0.5 mM DTT, 0.5 mM sodium orthovanadate). The total cell lysates were pre-cleared by incubating with protein G agarose beads (Roche) for 2 h at 4°C. Following pre-clearing, the lysates were incubated with primary antibodies overnight at 4°C, followed by incubation with protein G agarose beads for 2 h at 4°C. The beads were washed with IP buffer three times, and the protein immunocomplex was extracted from the agarose using methanol.

To detect AA binding with exogenous-expressing subunits, exogenous expressing vectors for six regulatory subunits of the Compass complex (pCMV Flag-RbBP5, Flag-WDR82, Flag-WDR5, Flag-CFP1, Flag-Menin, Flag-Ash2L) were transfected into 293T cells. After 48 h, the cells were harvested and lysed using adjusted IP lysis buffer, and anti-FLAG agarose beads were used for immune coprecipitation. Due to variations in the work efficiency of each exogenous expressing vector in cells, we adjusted the plasmid transfection amount by normalizing the WB band grayscale value. This allowed us to maintain an equivalent abundance of subunit proteins precipitated in the IP experiment. Thus, we were able to compare the differences in AA levels bound to an equal amount of subunit proteins.

To test the direct binding of AA (or ANA, or ADA) with Menin protein, we expressed recombinant Menin WT or Y323A mutant construct in *E. coli* cells and purified both proteins to homogeneity. For *in vitro* AA-Menin binding detection, 1.0 μg of purified 6 × His-Menin WT or Y323A mutant proteins were incubated with AA in 1 mL of adjusted IP lysis buffer at 37°C for 6 h. The IP assay was performed using standard protocols, and the protein-bound beads were washed three times. Methanol was used to extract the metabolites.

#### Trace-level quantitation of metabolites

The immunocomplexes were directly sorted into 100 μL of 100% acetonitrile (ACN), resulting in a final concentration of approximately 80% ACN due to flow-PBS contamination. The samples were then vacuum-concentrated using an E22 elite system (Genevac) and stored at –80°C until further processing. Targeted quantification of these metabolites by LC-MS was conducted using an Agilent 1290 Infinity II UHPLC coupled with a ProLab Zirconium Ultra microLC pump, in conjunction with an Agilent 6495 QQQ-MS operating in MRM mode. The ESI coupling was achieved using a prototype microLC ESI source (ProLab). MRM settings were optimized individually for AA, ADA, and ANA using pure standards, and the optimized settings were applied for detecting their respective isomers. LC separation was performed on a 100 × 0.3 mm column with 1.8 μm Zorbax Eclipse Plus C18 (Agilent). The solvent gradient ranged from 100% buffer A (10 mM ammonium formate in 90:10 water:methanol) to 100% buffer B (10 mM ammonium formate in 90:10 propanol:acetonitrile). The flow rate was set at 5 μL/min. The autosampler temperature was maintained at 5°C, and the injection volume was 5 μL. Data processing was carried out using Agilent MassHunter Software. For each experiment, at least two negative controls were measured to assess metabolite background levels. Metabolites were included only if they were detected above background levels and exhibited a retention time similar to the standard qualifier peak. To evaluate metabolic differences, the area under the curve (AUC) was determined.

#### Molecular docking analysis

For AA and Menin molecular docking, high-resolution crystal structures of Menin (PDB ID: 3U84) were retrieved from the Protein DataBank. The 3D structure of AA was downloaded from PubChem (PubChem CID: 444899). Subsequently, the Menin structure and AA structure were uploaded to Webina, an AutoDock-based webserver (<https://durrantlab.pitt.edu/webina/>). Among the top 9 docking complex models generated, AA was observed to bind within the central cavity formed at the interface of the thumb domain and the palm domain of Menin. The model displaying the highest binding affinity was chosen for further detailed analysis.

Next, we established the docking model of Menin and MLL1 with AA participation.

Docking model illustrating the participation of AA in the interaction of Menin and MLL1 (PDB ID: 3LQH). Molecular docking was performed, and AA was successfully positioned within the cavity, forming a reasonable binding mode. The Menin (PDB ID: 3U84) and MLL1 (PDB ID: 3LQH) complex was first established, followed by the participation of AA in the docking process with the Menin-MLL1 complex. The energy score was then used to evaluate the impact of AA on the interaction between Menin and MLL1.

#### **MST binding assay**

MST measurements were conducted using the Monolith NT.115 system (Nano Temper). Full-length Menin WT or Y323A mutant proteins were expressed and purified in *E. coli* cells following the established protocol. The purified Menin WT or Y323A mutant proteins were labeled with Atto 488 fluorescent dye according to the manufacturer's instructions. The labeling efficiency was determined to be 1:2 (protein:dye) by measuring the absorbance at 280 nm and 488 nm. A solution of AA or AA-Acetate in 0.01 M HEPES (pH 7.4), 0.15 M NaCl, and 0.005% v/v Surfactant P20 was serially diluted, typically ranging from 100  $\mu$ M to 30 nM, in the presence of 200 nM labeled Menin. After incubating at room temperature for 15 min, the samples were loaded into silica capillaries (Polymicro Technologies). Measurements were conducted at 22°C with 20% LED power and 40% IR-laser power. Additional measurements were performed with 20% and 60% IR-laser power for comparison purposes. Data analysis was carried out using the Nano Temper Analysis software, utilizing the Kd curve fitting function. The raw data were exported, and fitting curves were generated using GraphPad Prism 8 (RRID:SCR\_002798) for presentation.

#### **Surface plasmon resonance (SPR) binding assay**

SPR experiments were performed using a Biacore 8K (GE Healthcare). Recombinant Menin WT and Y323A mutant proteins were immobilized onto a Series S Sensor Chip CM5 (GE Healthcare) with Amine Coupling Kit (GE Healthcare) at pH 5.5. The binding of the test compound AA was measured with a continuous flow of PBS, pH 7.4, 0.05% tween 20 including 5% DMSO at 25°C (30  $\mu$ L/min, association 120 s, dissociation 120 s). 2-fold serial dilutions of the ARA were flowed through with a concentration ranging from 100 to 0.195 M. DMSO solvent correction curves were generated by injecting the running buffers with serial concentrations of DMSO ranging from 4.5 to 5.8%. All the binding data were double referenced by blank cycle and reference flow cell subtraction. The resulting data were fit to a 1:1 Langmuir binding model using Biacore Insight Evaluation Software 4.0 (GE Healthcare).

### **QUANTIFICATION AND STATISTICAL ANALYSIS**

Statistical analysis was conducted using SPSS 19.0 software, GraphPad Prism 5, and ImageJ software. Two-tailed and unpaired Student's t-tests were utilized for comparisons between two groups. The data, obtained from at least three independent experiments performed in triplicates, are presented as means  $\pm$  standard error (SE). Spearman's correlation test was performed to analyze the correlation between two genes. For comparisons among three or more groups with comparable variations, the Two-Way ANOVA test was initially employed. If the results showed a significant difference, the Student Newman-Keuls analysis was utilized to determine the difference between the two groups. Survival curves were estimated using the Kaplan-Meier method and compared using the log rank test. All statistical tests and p values were two-sided.  $p < 0.05$  was considered statistically significant. n.s., not significant; \* $p < 0.05$ ; \*\* $p < 0.01$ ; \*\*\* $p < 0.001$ .

**Cell Reports Medicine, Volume 5**

**Supplemental information**

**Arachidonic acid released by PIK3CA mutant tumor cells triggers malignant transformation of colonic epithelium by inducing chromatin remodeling**

**Baoyu He, Qingli Bie, Rou Zhao, Yugang Yan, Guanjun Dong, Baogui Zhang, Sen Wang, Wenrong Xu, Dongxing Tian, Yujun Hao, Yanhua Zhang, Mingsheng Zhao, Huabao Xiong, and Bin Zhang**

## Supplemental Information

# **Arachidonic acid released by PIK3CA mutant tumor cells triggers malignant transformation of colonic epithelium by inducing chromatin remodeling**

Baoyu He<sup>1,2,8</sup>, Qingli Bie<sup>1,2,8</sup>, Rou Zhao<sup>1</sup>, Yugang Yan<sup>3</sup>, Guanjun Dong<sup>4</sup>, Baogui Zhang<sup>5</sup>, Sen Wang<sup>1</sup>, Wenrong Xu<sup>6</sup>, Dongxing Tian<sup>1</sup>, Yujun Hao<sup>7</sup>, Yanhua Zhang<sup>7</sup>, Mingsheng Zhao<sup>4</sup>, Huabao Xiong<sup>4,\*</sup>, Bin Zhang<sup>1,9,\*</sup>

<sup>1</sup>Department of Laboratory Medicine, Affiliated Hospital of Jining Medical University, Jining Medical University, Jining, Shandong 272000, China

<sup>2</sup>School of Integrative Medicine, Shandong University of Traditional Chinese Medicine, Jinan, Shandong 250355, China

<sup>3</sup>school of medical engineering, Jining Medical University, Jining, Shandong 272067, China

<sup>4</sup>Institute of Immunology and Molecular Medicine, Jining Medical University, Jining, Shandong 272067, China

<sup>5</sup>Department of Gastrointestinal Surgery, Affiliated Hospital of Jining Medical University, Jining Medical University, Jining, Shandong 272000, China

<sup>6</sup>Key Laboratory of Laboratory Medicine of Jiangsu Province, School of Medicine, Jiangsu University, Zhenjiang, Jiangsu 212000, China

<sup>7</sup>State Key Laboratory of Oncogenes and Related Genes, Shanghai Cancer Institute, Renji Hospital, Shanghai Jiao Tong University School of Medicine, Shanghai 200032, China

<sup>8</sup>These authors contributed equally

<sup>9</sup>Lead contact

#Correspondence: zhangbin@mail.jnmc.edu.cn (B.Z.), xionghbl@163.com (H.X.)

**Supplemental results of the directly educated F1 xenograft  
(Tumor cell:NCM = 1:10, 1:5 or 1:1)**

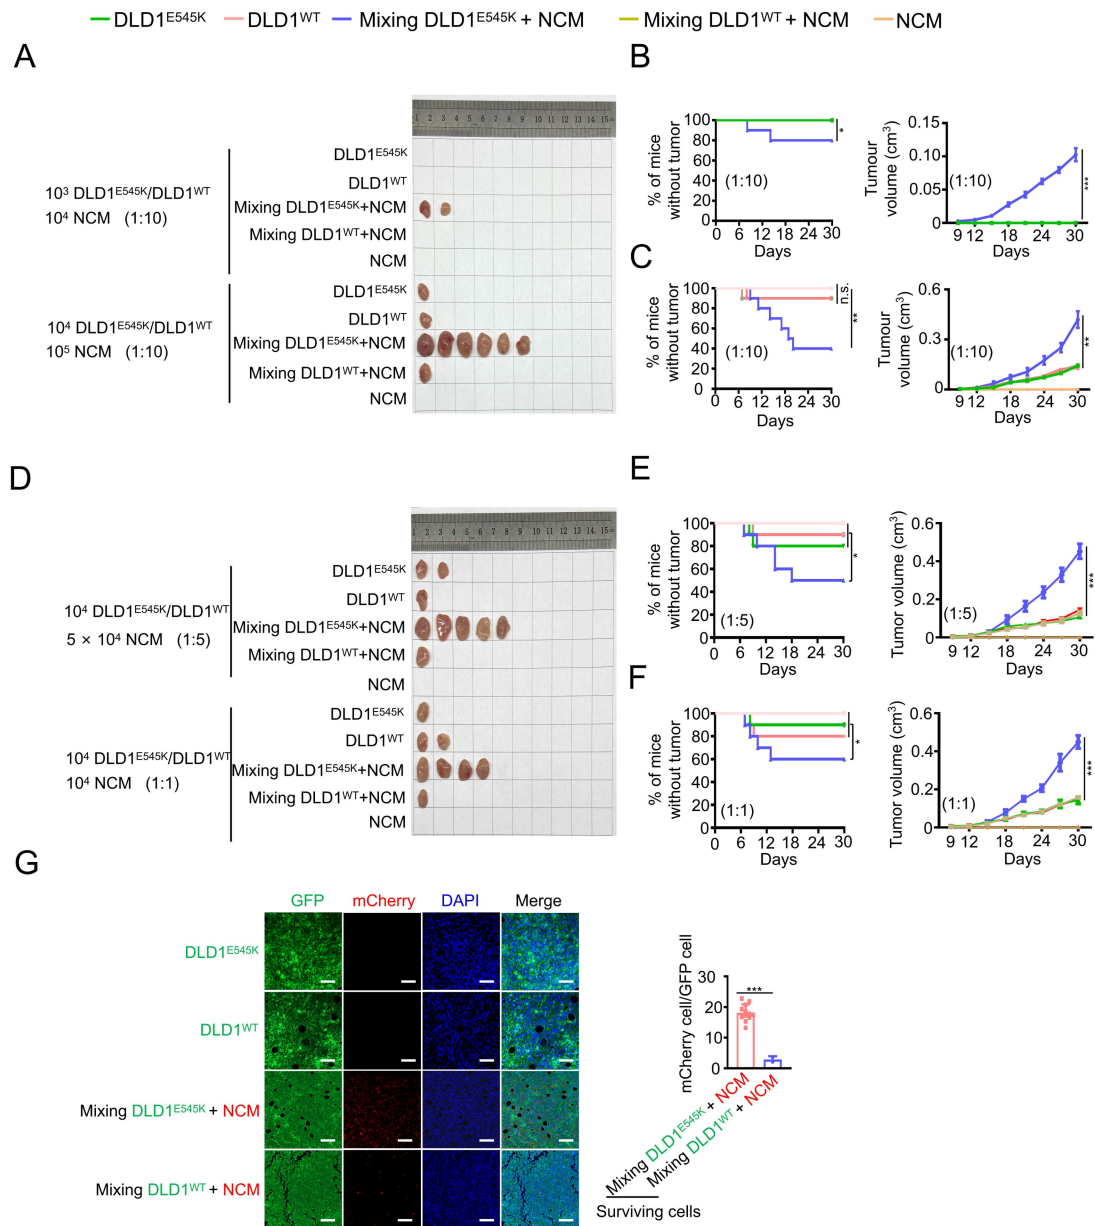

**Supplemental Figure 1: Supplemental results of the Direct Education Model involving PIK3CA E545K mutant tumor cells and NCM460 cells (related to Fig. 1).**

(A) Photographs of tumors established using the indicated cells of the Direct Education F1 Xenograft. The ratio of tumor cell and NCM460 cell is 1:10.

(B and C) Tumor incidence and tumor volume of the Direct Education F1 xenograft of S1A (n=10). In the left panel of B section, the plotted lines of DLD1<sup>E545K</sup> group, DLD1<sup>WT</sup> group, Mixing DLD1<sup>WT</sup> + NCM group, and NCM group were overlapped. B



and C: data are represented as means  $\pm$  SEM; n = 10 mice per cohort.

(D) Photographs of tumors established using the indicated cells of the Direct Education F1 Xenograft. The ratio of tumor cell and NCM460 cell is 1:5 (upper) or 1:1 (bottom)..

(E and F) Tumor incidence and tumor volume of the Direct Education F1 Xenograft. of S1C. E and F: data are represented as means  $\pm$  SEM; n = 10 mice per cohort.

(G) The indicated xenograft tissues were stained with anti-GFP (representing PIK3CA E545K mutant cells or PIK3CA WT cells) and anti-mCherry (representing NCM460 cells) antibodies, and the ratio of mCherry<sup>+</sup> cells to GFP<sup>+</sup> cells in the F1 xenograft was quantified. Scale bar = 20  $\mu$ m. Data are represented as means  $\pm$  SEM; n = 12 mice per cohort.

Statistical analyses, n.s., not significant; \*p < 0.05; \*\*p < 0.01; \*\*\*p < 0.001. P-values in (B, left), (C, left), (E, left) and (F, left) were calculated with two-way ANOVA test. P-values in (B, right), (C, right), (E, right) and (F, right) were calculated using log-rank test. P-values in (G, right) were calculated using two-tailed student's t-test.

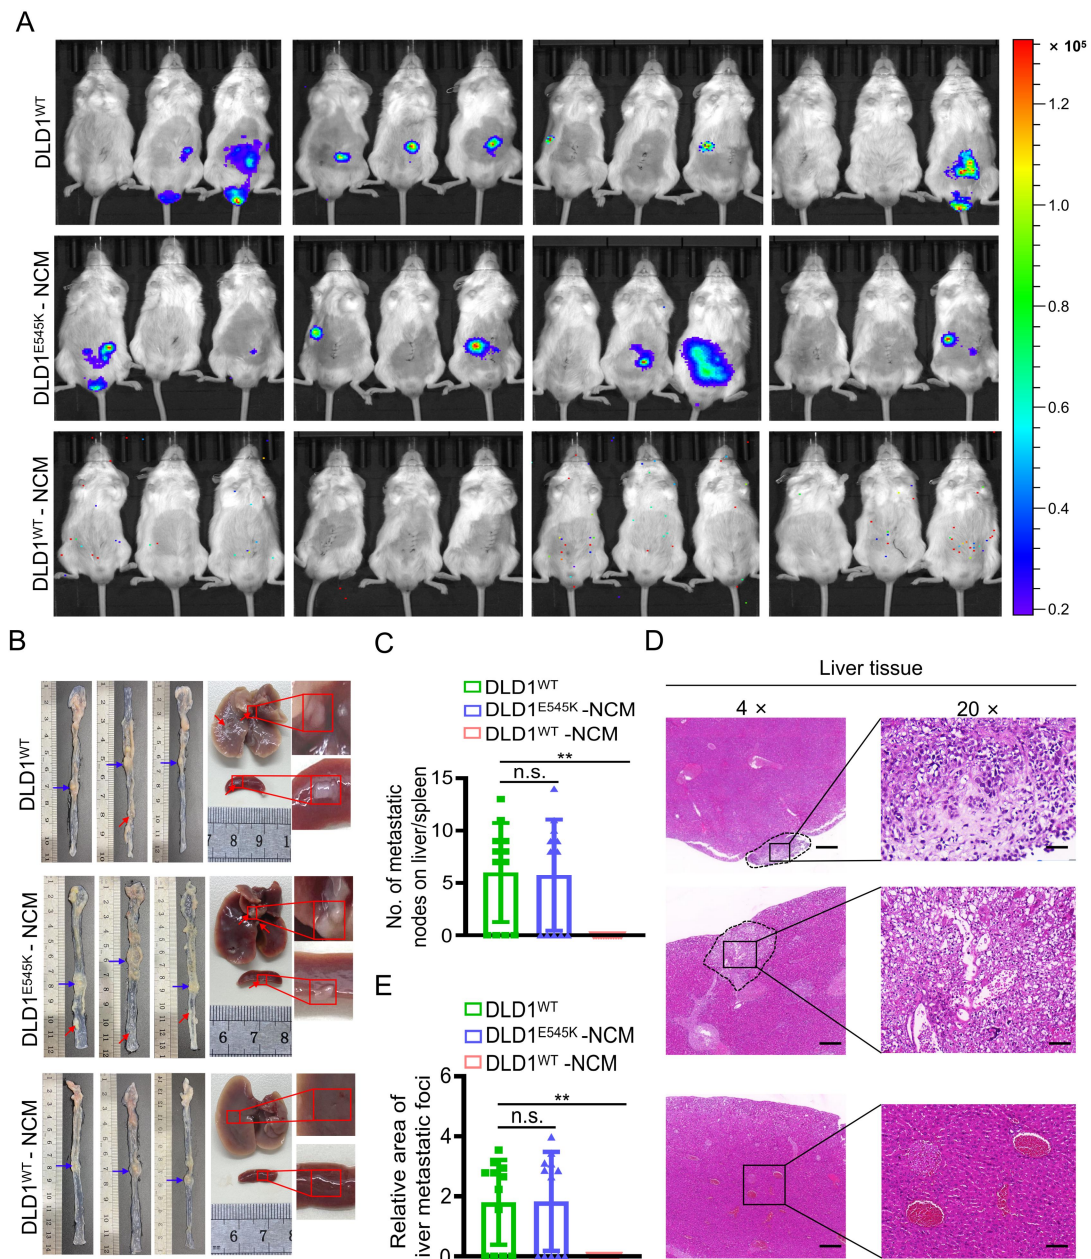

**Supplemental Figure 2: Supplemental results of the colon orthotopic tumor metastasis model established using the directly educated-NCM460 F2 cells (related to Fig. 1).**

(A) Representative bioluminescent images of mice from the colon orthotopic metastasis model.

(B) Representative macroscopic images of the colon, liver, and spleen from the colon orthotopic metastasis model. The blue arrow indicates the inoculation site in the distal colon, and the red arrow indicates metastatic nodules in the rectum, liver and spleen.

(C) Numbers of metastasized tumor nodules in the liver and spleen per mouse were

counted (mean  $\pm$  SEM, n = 12 mice per cohort).

(D) Representative H&E images of the liver tissues from the colon orthotopic metastasis model. We can clearly see the metastatic lesions on the liver tissues from the colon orthotopic metastasis model established by DLD1<sup>E545K</sup> tumor cell educated-NCM460 F2 cells. 4 $\times$ : scale bar = 1000  $\mu$ m; 20 $\times$ : scale bar = 20  $\mu$ m.

(E) Relative areas of metastatic foci in the liver were calculated (mean  $\pm$  SEM, n = 12 mice per cohort).

Statistical analyses, n.s., not significant; \*\*p < 0.01; P-values in (C) and (E) were calculated using two-tailed student's t-test.

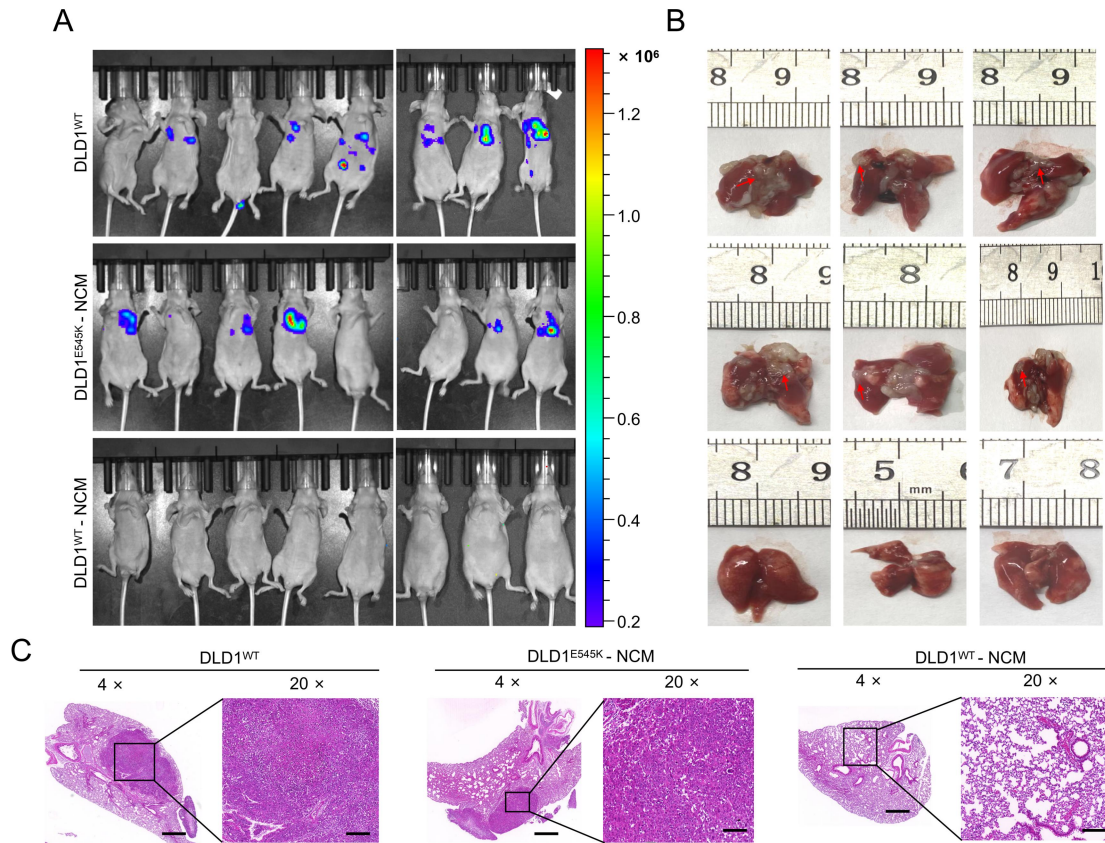

**Supplemental Figure 3: Supplemental results of the tail vein metastasis model established using the directly educated-NCM460 F2 cells (related to Fig. 1).**

(A) Representative bioluminescent images of mice in the tail vein metastasis model.

(B) Representative lung images in the tail vein metastasis model.

(C) Representative H&E staining on tumor lung foci in nude mice. 4×: scale bar = 1000  $\mu\text{m}$ ; 20×: scale bar = 20  $\mu\text{m}$ .

## In-vitro function assays of the direct educated NCM F2 cells

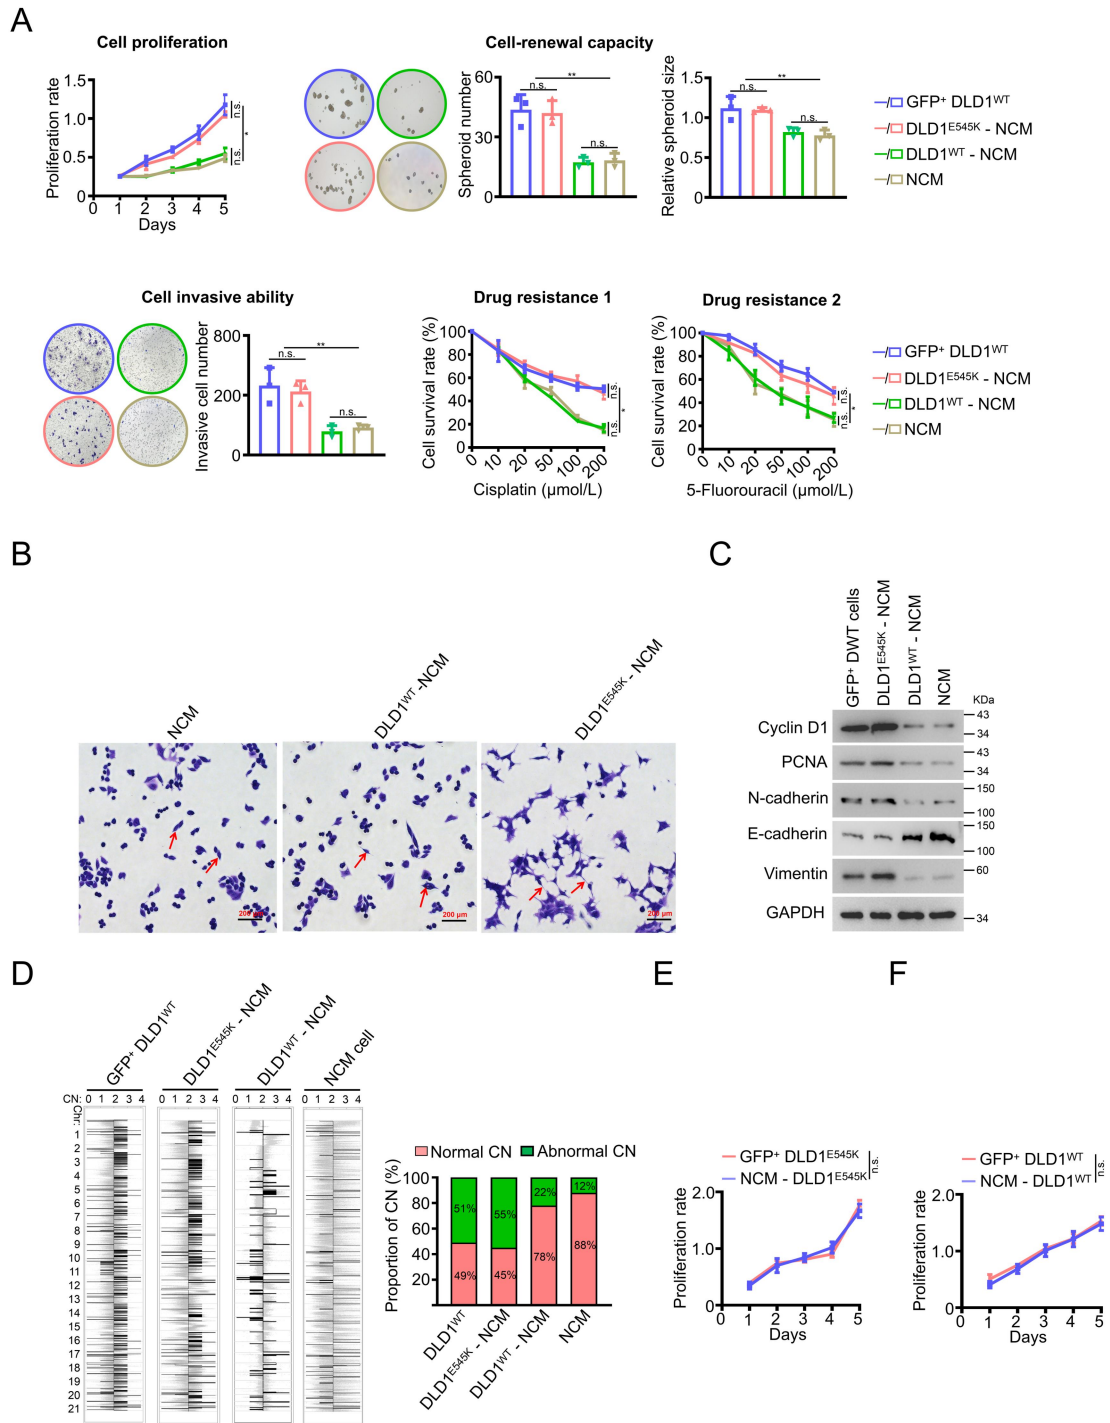

**Supplemental Figure 4: Supplemental results of the Direct Education Model involving PIK3CA E545K mutant tumor cells and NCM460 cells (related to Fig. 1).**

(A) *In-vitro* function of NCM460 F2 cells sorted from the directly educated xenograft tumors was assayed, including cell viability, cell renewal capacity, cell invasive ability, and sensitivity to cisplatin and 5-fluorouracil (mean  $\pm$  SEM, n = 3 biological

replicates).

(B) Representative morphological images of NCM460 F2 cells sorted from the directly educated xenograft tumors, as assessed by phase contrast microscopy (100 ×). Crystal violet was used for cells staining.

(C) Assessment of EMT-related markers, including N-cadherin, E-cadherin, and Vimentin, in NCM460 F2 cells sorted from the directly educated xenograft tumors.

(D) Copy Number Variation Analysis (CNV) based on whole-genome sequencing was performed on DLD1<sup>WT</sup> cells, NCM460 F2 cells sorted from the directly educated xenograft tumors, and the NCM460 cell line.

(E) Assessment of cell viability in sorted DLD1<sup>E545K</sup> cells from xenografts established using "pure DLD1<sup>E545K</sup> cells" and "cell mixture of DLD1<sup>E545K</sup> and NCM460" (mean ± SEM, n = 3 biological replicates).

(F) Assessment of cell viability in sorted DLD1<sup>WT</sup> cells from xenografts established using "pure DLD1<sup>WT</sup> cells" and "cell mixture of DLD1<sup>WT</sup> and NCM460" (mean ± SEM, n = 3 biological replicates).

Statistical analyses, n.s., not significant; \*p < 0.05; \*\*p < 0.01; P-values in (A) were calculated using two-way ANOVA or two-tailed student's t-test. P-values in (D) and (E) were calculated using two-way ANOVA test.

## Supplemental results of the directly ducated xenograft (Tumor cell:NCM = 1:10)

A

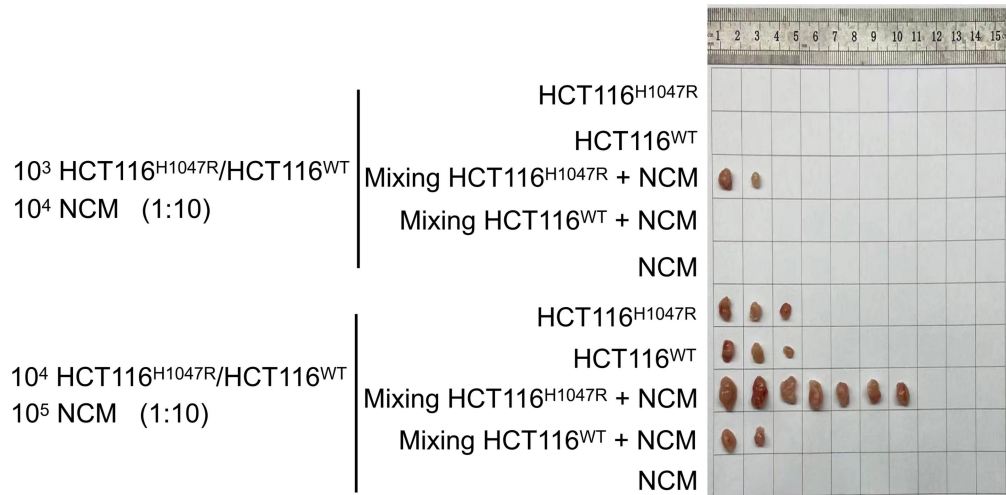

B

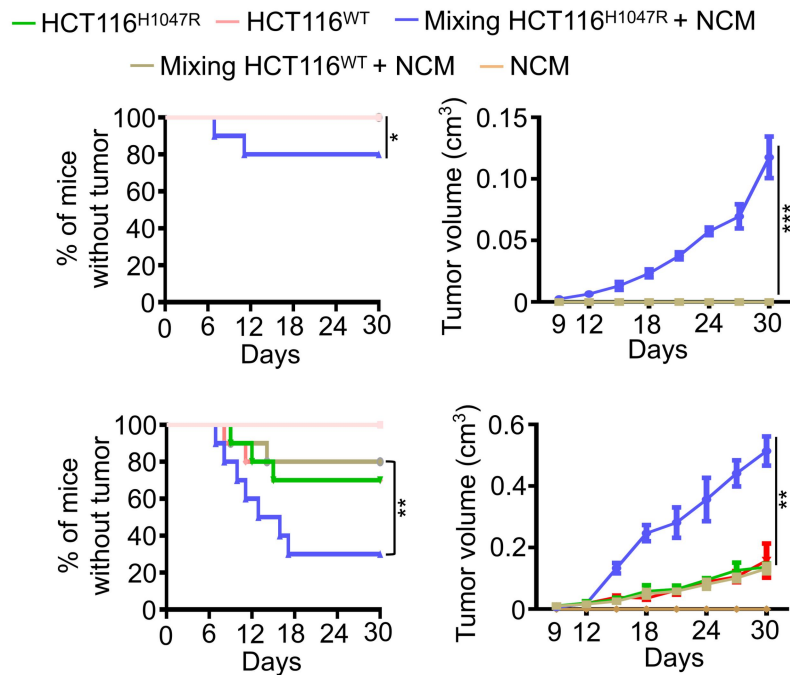

**Supplemental Figure 5: Supplemental results of the Direct Education Model involving PIK3CA H1047R mutant tumor cells and NCM460 cells (related to Fig. 1).**

(A) Photographs of tumors established using the indicated cells in the Direct Education F1 Xenograft. The ratio of tumor cell and NCM460 cell is 1:10.

(B) Tumor incidence and tumor volume of the Direct Education F1 Xenograft of S5A.

In the upper panel, the plotted lines of HCT116<sup>H1047R</sup> group, HCT116<sup>WT</sup> group, Mixing HCT116<sup>WT</sup> + NCM group, and NCM group were overlapped. Data are represented as means  $\pm$  SEM; n = 10 mice per cohort.

Statistical analyses, \*p < 0.05; \*\*p < 0.01. P-values in (B, left) were calculated using log-rank test. P-values in (B, right) were calculated using two-way ANOVA test.



***In-vitro* function assays of PCE cells treated with indicated medium**

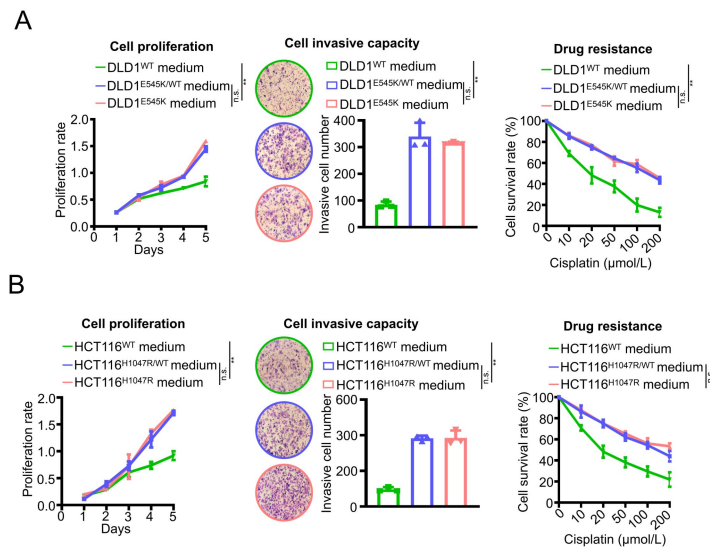

**Supplemental results of the Direct Education Model (Tumor cell:PCE = 1:10)**

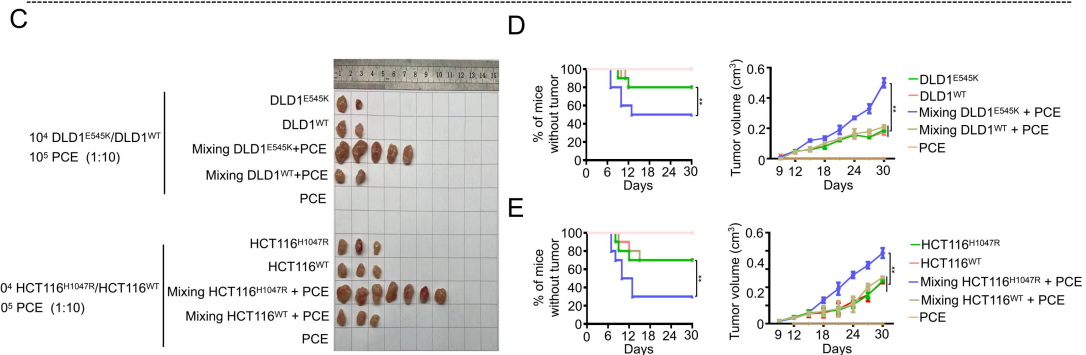

**Supplemental Figure 6: *In-vitro* and *in-vivo* function assays confirming that PIK3CA mutant cells enhance cell proliferation, cell invasion, drug resistance, and tumor-forming capacity of PCE cells (related to Fig. 1).**

(A and B) *In-vitro* function including cell viability, cell invasive ability, and cisplatin sensitivity of PCE cells treated with the indicated media was assayed. A and B: data are represented as means  $\pm$  SEM; n = 3 biological replicates.

(C) Photographs of tumors established using the indicated cells in the Direct Education F1 Xenograft. The ratio of tumor cell and NCM460 cell is 1:10.

(D and E) Tumor incidence and tumor volume of the Direct Education F1 Xenograft of S6C. D and E: data are represented as means  $\pm$  SEM; n = 10 mice per cohort.

Statistical analyses, n.s., not significant; \* p < 0.05; \*\* p < 0.01. P-values in (A) and (B) were calculated using two-way ANOVA or two-tailed student's t-test. p values in (D, left) and (E, left) were calculated using log-rank test. P-values in (D, right) and (E, right) were calculated using two-way ANOVA test.

## In-vitro function assays of the directly educated PCE F2 cells

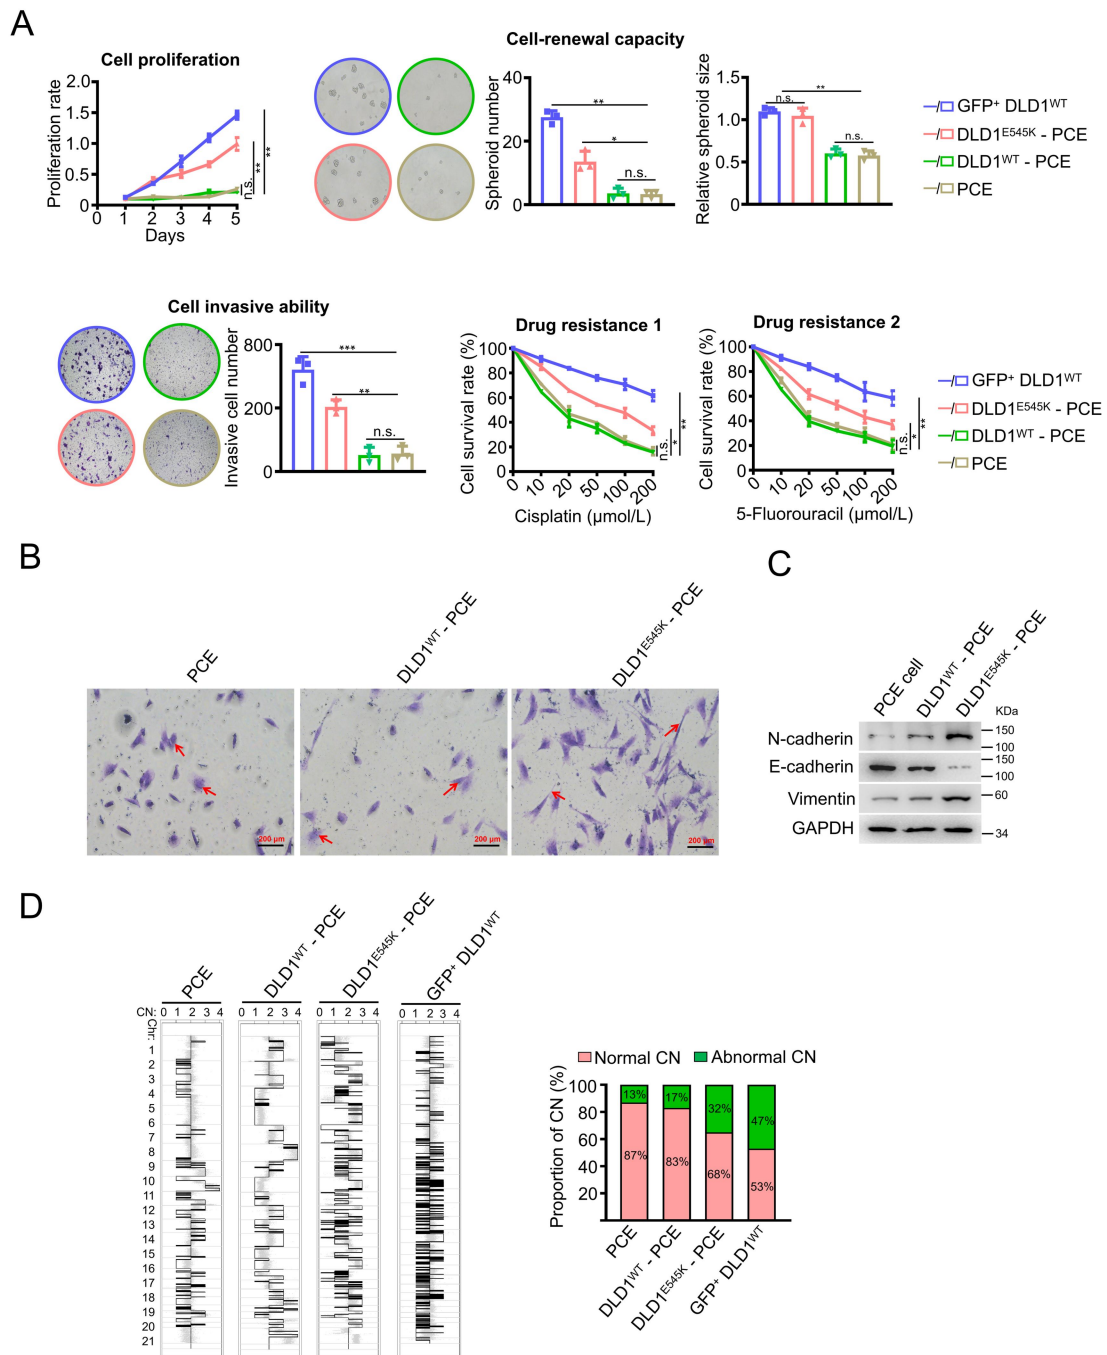

**Supplemental Figure 7: Supplemental results of the Direct Education Model involving PIK3CA E545K mutant tumor cells and PCE cells (related to Fig. 1).**

(A) *In-vitro* function of NCM460 F2 cells sorted from the directly educated xenograft tumors was assayed, including cell viability, cell renewal capacity, cell invasive ability, and sensitivity to cisplatin and 5-fluorouracil (mean  $\pm$  SEM, n = 3 biological replicates).

(B) Representative morphological images of PCE F2 cells sorted from the directly

educated xenograft tumors, as assessed by phase contrast microscopy (100 ×). Crystal violet was used for cells staining.

(C) Assessment of EMT-related markers, including N-cadherin, E-cadherin, and Vimentin in PCE F2 cells sorted from the direct education xenograft tumors.

(D) Copy Number Variation (CNV) analysis based on whole-genome sequencing of PCE F2 cells sorted from the direct education xenograft tumors.

Statistical analyses, n.s., not significant; \* $p < 0.05$ ; \*\* $p < 0.01$ ; \*\*\* $p < 0.001$ . P-values in

(A) were calculated using two-way ANOVA test or two-tailed student's t-test.

Supplemental results of the Far-end Education Model

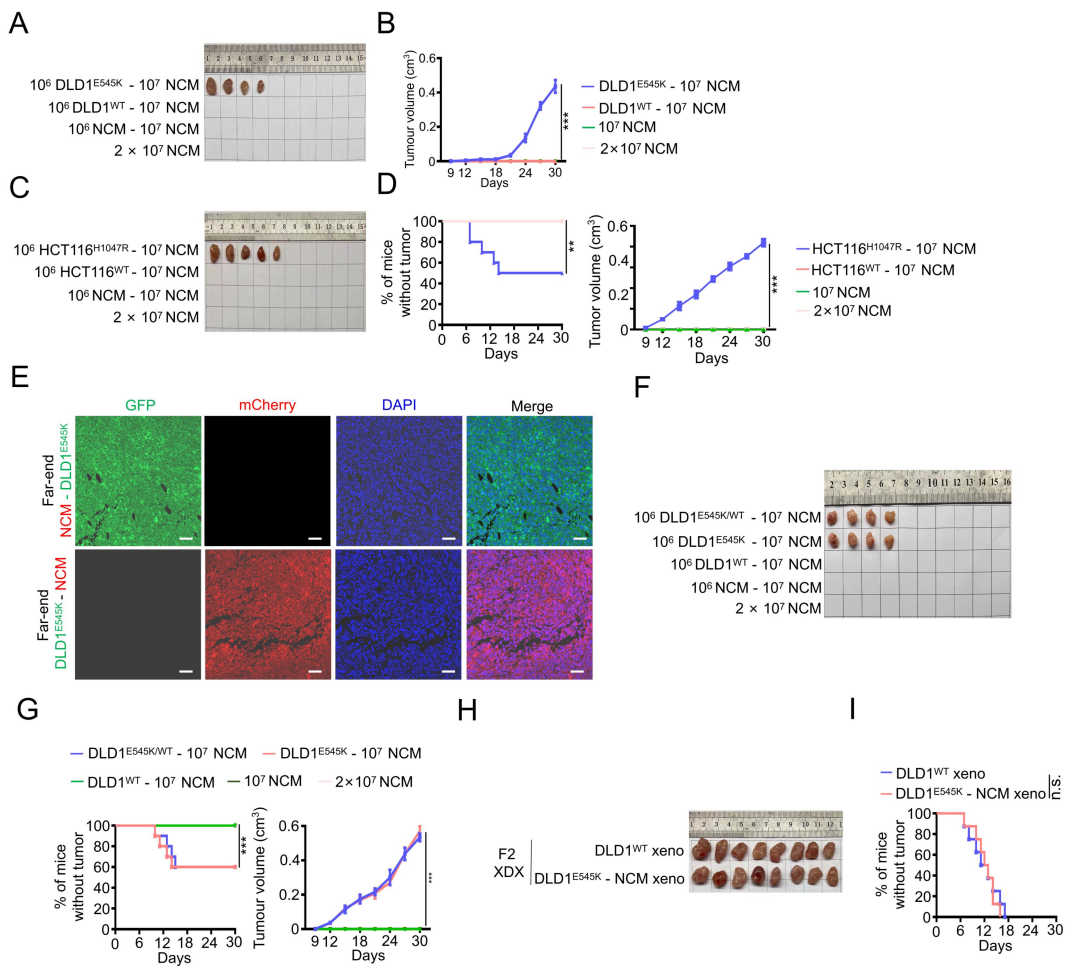

**Supplemental Figure 8: Supplemental results of the Far-end Education Model involving PIK3CA E545K or H1047R mutant tumor cells and NCM460 cells (related to Fig. 1).**

(A) Photographs of tumors established using the indicated cells in the Far-end Education Model.

(B) Tumor volume of NCM460 F1 xenograft from the Far-end Education Model (mean  $\pm$  SEM, n = 10 mice per cohort). The plotted lines of DLD1<sup>WT</sup>- $10^7$  NCM group,  $10^7$  NCM group and  $2 \times 10^7$  NCM group were overlapped.

(C) Photographs of tumors established using the indicated cells in the Far-end Education Model.

(D) Tumor incidence and tumor volume of NCM460 F1 xenograft from the Far-end Education Model (mean  $\pm$  SEM, n = 10 mice per cohort). The plotted lines of HCT116<sup>WT</sup>- $10^7$  NCM group,  $10^7$  NCM group and  $2 \times 10^7$  NCM group were

overlapped.

(E) Immunofluorescent staining of the indicated xenograft tissues using anti-GFP and anti-mCherry antibodies in the Far-end Education Model. Scale bar = 20  $\mu$ m.

(F) Photographs of tumors established using the indicated cells in the Far-end Education Model.

(G) Tumor incidence and tumor volume of NCM460 F1 xenograft from the Far-end Education Model (means  $\pm$  SEM, n = 10 mice per cohort). The plotted lines of DLD1<sup>WT</sup>-10<sup>7</sup> NCM group, 10<sup>7</sup> NCM group and 2  $\times$  10<sup>7</sup> NCM group were overlapped.

(H) Photographs of F2 XDX tumors established using the indicated xenografts from the Far-end Education Model.

(I) Tumor incidence of F2 xenograft derived xenograft (XDX) tumors established using the indicated xenografts from the Far-end Education Model (n = 8 mice per cohort).

Statistical analyses, n.s., not significant; \*\*p < 0.01; \*\*\*p < 0.001. P-values in (B) and (D, right) were calculated using two-way ANOVA test. P-values in (D, left) and (G) were calculated using log-rank test.

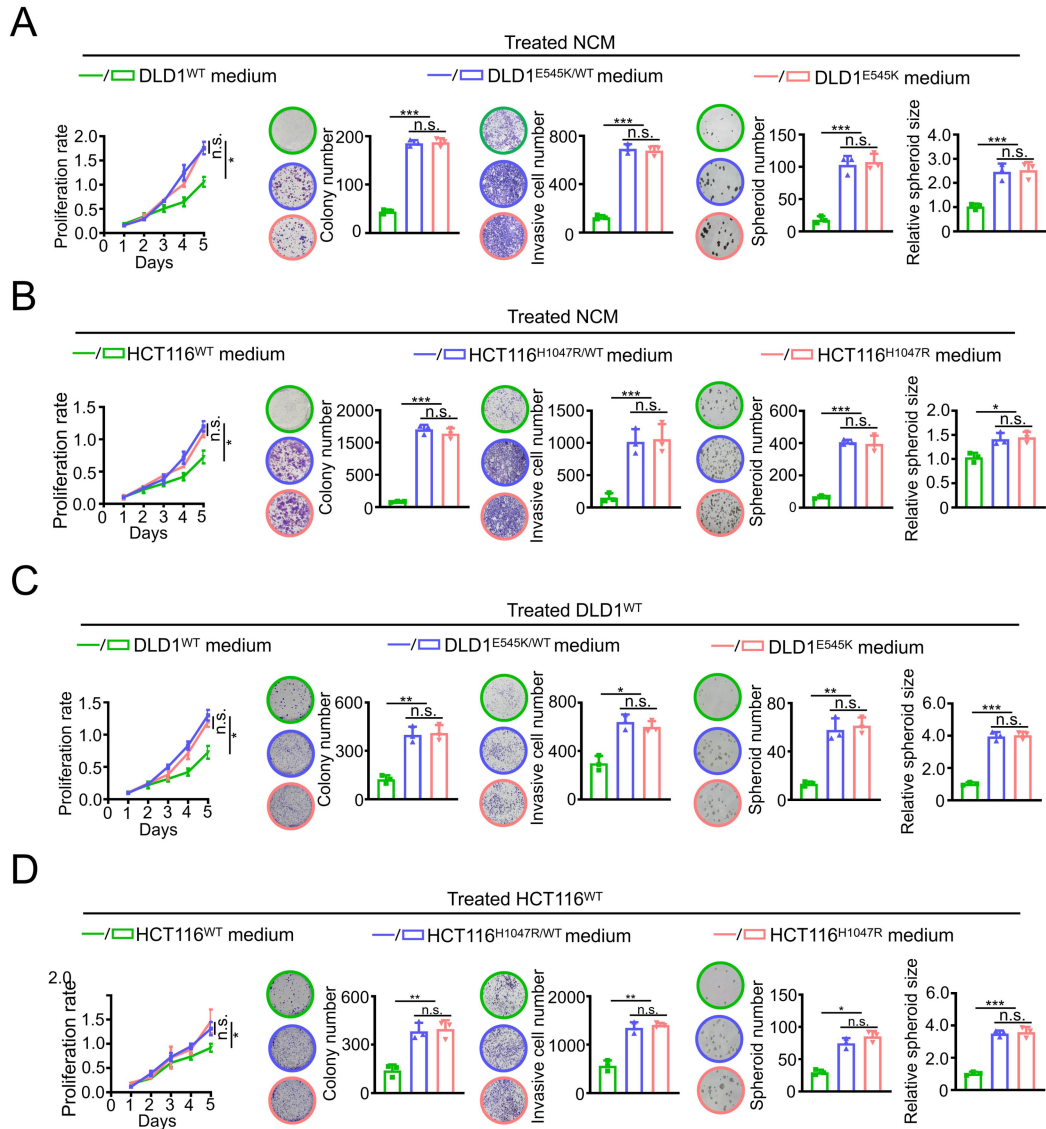

**Supplemental Figure 9: *In vitro* function assays confirming that media from PIK3CA mutant cells enhances cell proliferation, clone formation, cell invasion, and self-renewal capacity of colon epithelial NCM460 cells, DLD1<sup>WT</sup> cells and HCT116<sup>WT</sup> cells (related to Fig. 1).**

(A-D) *In-vitro* function of NCM460 cells (A and B), DLD1<sup>WT</sup> cells (C) and HCT116<sup>WT</sup> cells (D) treated with the indicated media was assayed, including cell viability, colony-forming efficiency, cell invasive ability, and cell renewal capacity. A-D: data are represented as means  $\pm$  SEM; n = 3 biological replicates.

Statistical analyses, n.s., not significant; \* p < 0.05; \*\* p < 0.01; \*\*\* p < 0.001. P-values in (A), (B), (C) and (D) were calculated using two-way ANOVA test or two-tailed student's t-test.

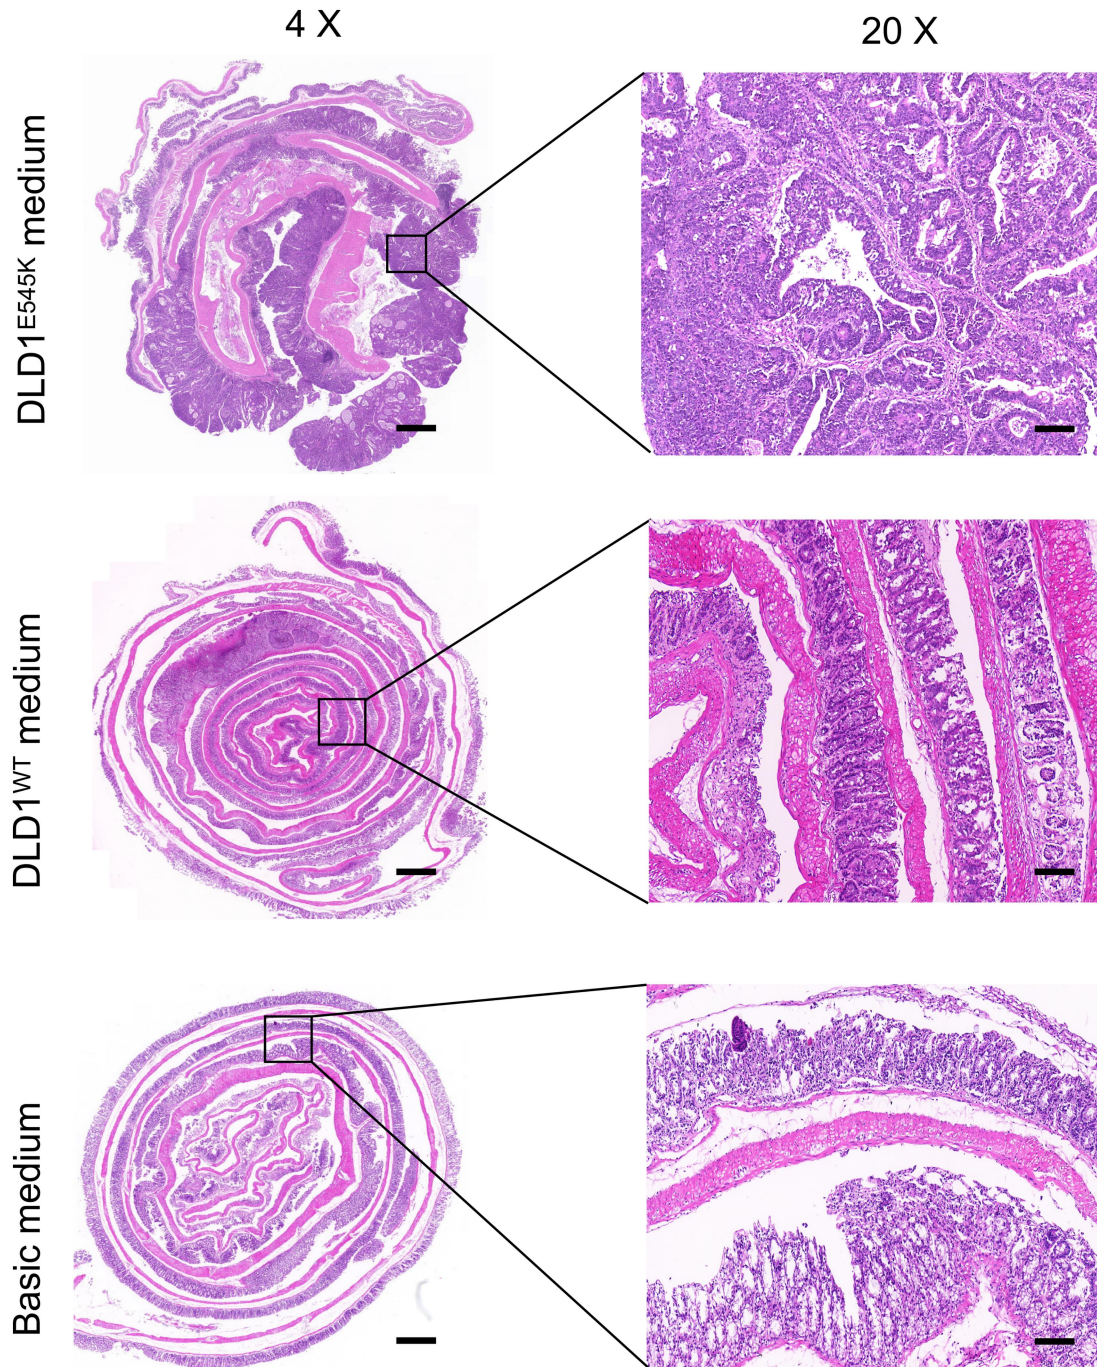

**Supplemental Figure 10: Supplemental results of the AOM/DSS-induced colon tumorigenesis model (related to Fig. 1).**

Representative H&E images of colon Swiss rolls from the AOM/DSS-induced colon tumorigenesis model treated with the indicated media. 4×: scale bar = 1000 μm; 20×: scale bar = 20 μm.

**A**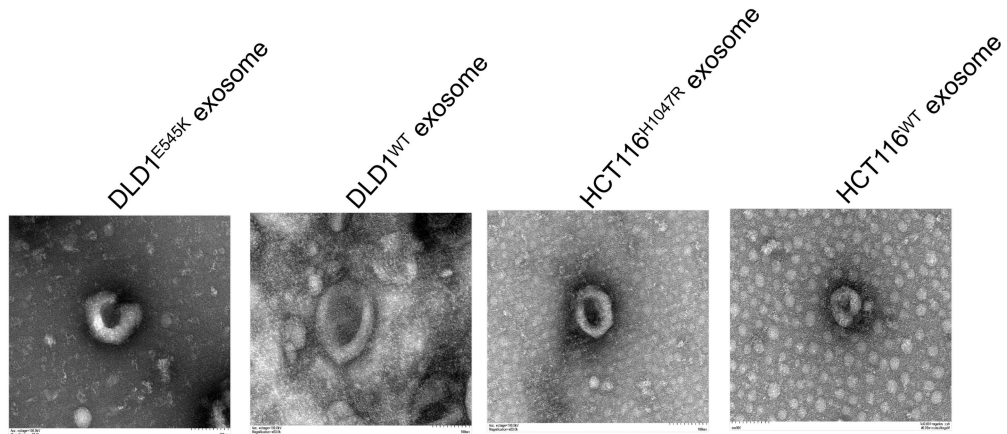**B**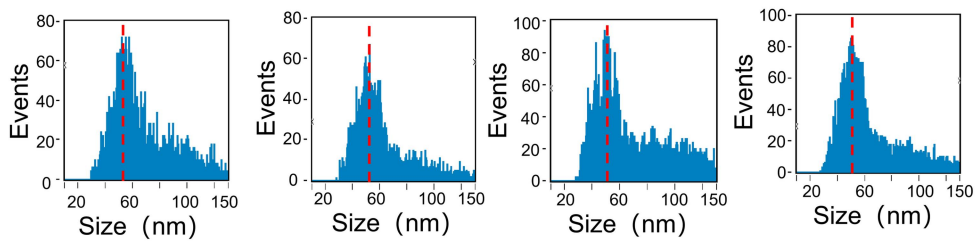**C**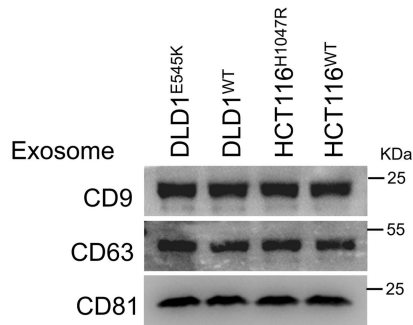

**Supplemental Figure 11: Extraction and identification of exosomes (related to Fig. 2).**

(A) Representative high-resolution transmission electron microscopy images of exosomes (scale bar = 100 nm).

(B) Analysis of exosome particle size using Nanosight.

(C) Detection of exosomal biomarkers (CD63, CD9 and CD81) by Western blotting analyses.



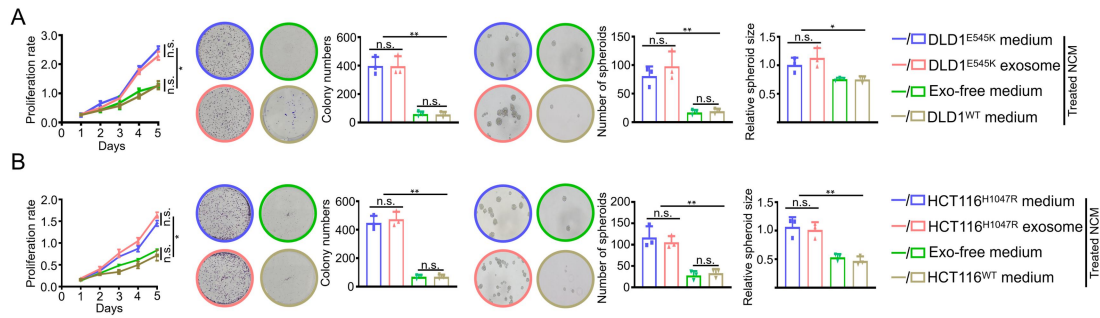

**Supplemental Figure 12: *In-vitro* identification of exosomes as key mediators transmitting oncogenic mutation signals (related to Fig. 2).**

(A and B) *In-vitro* function including cell viability, colony-forming efficiency, cell invasive ability, and cell renewal capacity of NCM460 cells treated with the indicated media or exosomes was assayed. A and B: data are represented as means  $\pm$  SEM; n = 3 biological replicates.

Statistical analyses, n.s., not significant; \*p < 0.05; \*\*p < 0.01. P-values in (A) and (B) were calculated using two-way ANOVA test or two-tailed student's t-test.

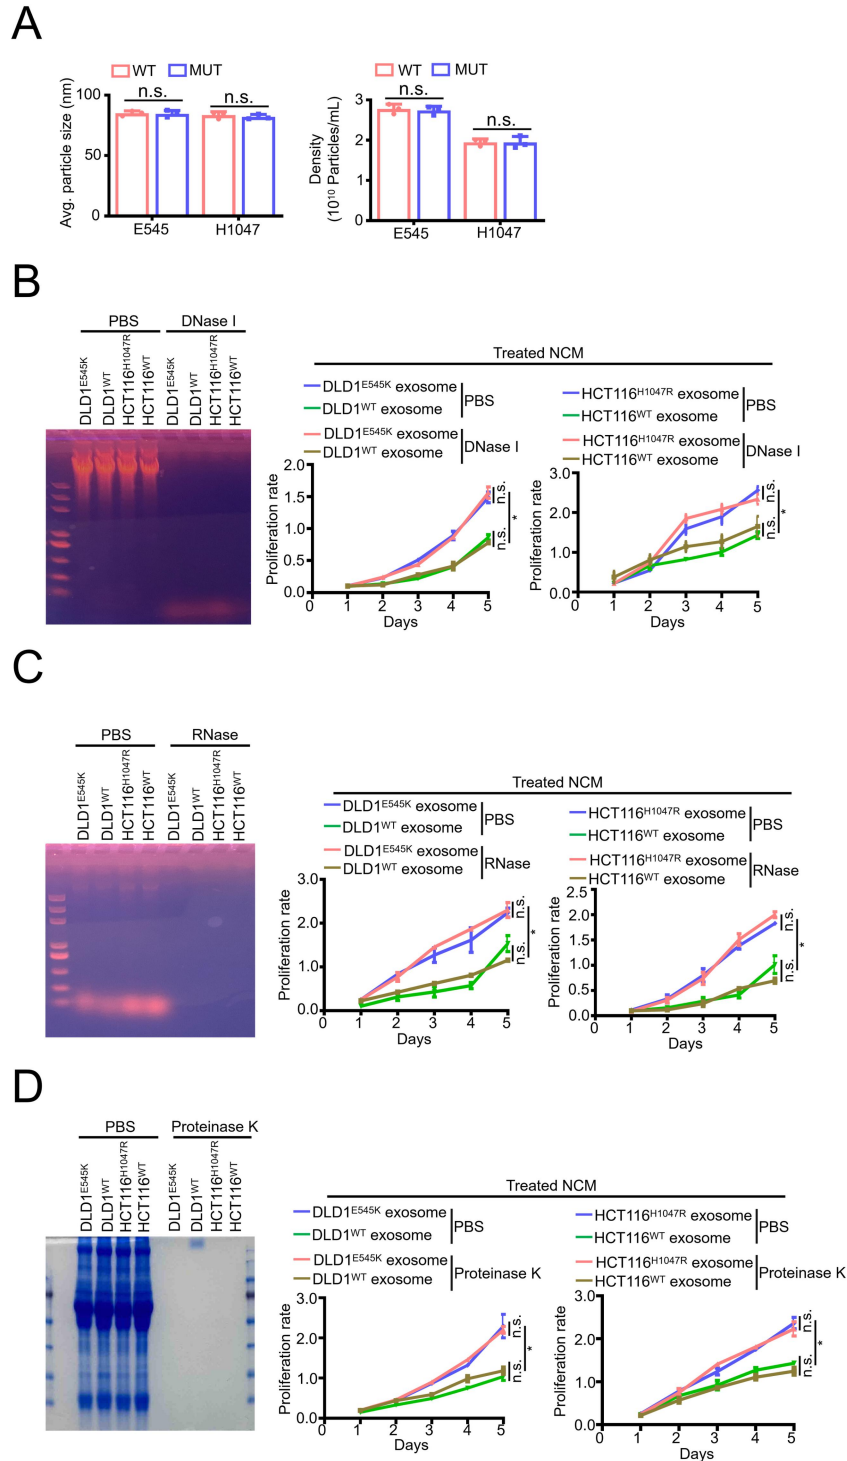

**Supplemental Figure 13: The impact of DNase I, RNase, and protease K on the exosome function in transmitting oncogenic mutation signals (related to Fig. 3).**

(A) Analysis and comparison of the particle sizes and densities of exosomes derived from PIK3CA mutant and isogenic WT tumor cells (means  $\pm$  SEM, n = 3 biological replicates).

(B-D) Assessment of cell viability in NCM460 cells treated with exosomes pre-treated

with DNase I, RNase, or protease K. Exosomes were treated using DNase I, RNase, or protease K as described in the method section. Then, NCM460 cells were treated with hydrolysate and subjected to cell viability assay (Right panel of B-D). To verify the efficiency of enzymatic hydrolysis, total DNA, RNA or protein were extracted from treated-exosomes and subjected to agarose gel electrophoresis (total DNA or RNA) and Coomassie Blue Staining (total protein) (Left panel of B-D). Data are represented as means  $\pm$  SEM; n = 3 biological replicates for proliferation assay.

Statistical analyses, n.s., not significant; \*p < 0.05. P-values in (A) were calculated using two-tailed student's t-test. P-values in (B, right), (C, right) and (D, right) were calculated using two-way ANOVA test. Experiments were performed three times independently.

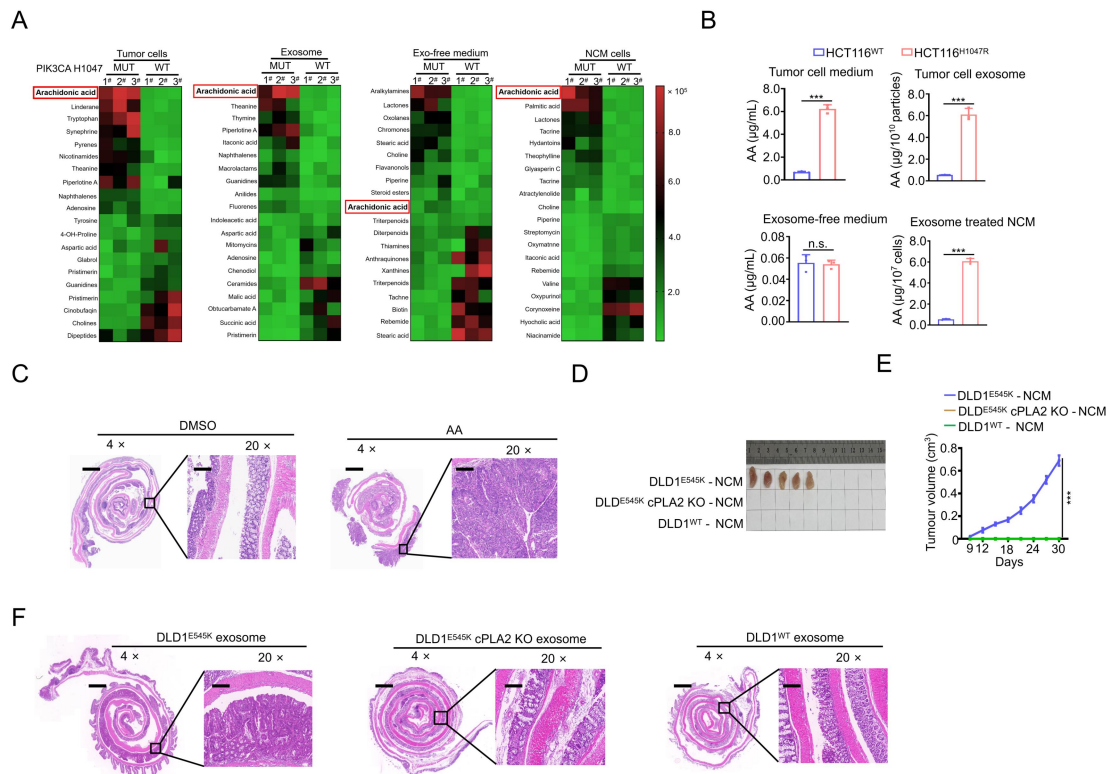

**Supplemental Figure 14: Supplemental results supporting exosomal AA as the key mediator of oncogenic mutation signal transmission (related to Fig. 3).**

(A) Heatmaps displaying top 20 differential metabolites (10 upregulated and 10 downregulated) in four group: PIK3CA H1047R or isogenic WT donor tumor cells, exosome components or the exosome-depleted media from the PIK3CA H1047R or isogenic WT donor tumor cells, and NCM460 recipient cells treated with exosome components from the PIK3CA H1047 or isogenic WT cells, as analyzed by untargeted metabolomics analysis (n = 3 biological replicates).

(B) Quantitative abundance of AA in medium, exosomes, and exosome-free medium derived from PIK3CA H1047R and isogenic WT cells, as well as in exosome-treated recipient NCM460 cells was measured using LC-MS/MS method (mean ± SEM, n = 3 biological replicates).

(C) Representative H&E staining images of colon swiss rolls from the AOM/DSS-induced colon tumorigenesis model treated with either DMSO or AA. 4×: scale bar = 1000 µm; 20×: scale bar = 20 µm.

(D) Photographed tumors established using the indicated cells of the Far-end Education Model; tumor cell:NCM460 cell ratio = 1:10.

(E) Tumor volume of NCM460 F1 xenografts from the Far-end Education Model. The plotted lines of DLD1<sup>E545K</sup> cPLA2 KO-NCM group and DLD1<sup>WT</sup>-NCM group were overlapped (means  $\pm$  SEM, n = 10 mice per cohort).

(F) Representative H&E staining images of colon swiss rolls from the AOM/DSS-induced colon tumorigenesis model treated with indicated exosomes. 4 $\times$ : scale bar = 1000  $\mu$ m; 20 $\times$ : scale bar = 20  $\mu$ m.

Statistical analyses, n.s., not significant; \*\*\*p < 0.001. P-values in (B) were calculated with two-tailed student's t-test. P-values in (E) were tested with two-way ANOVA.

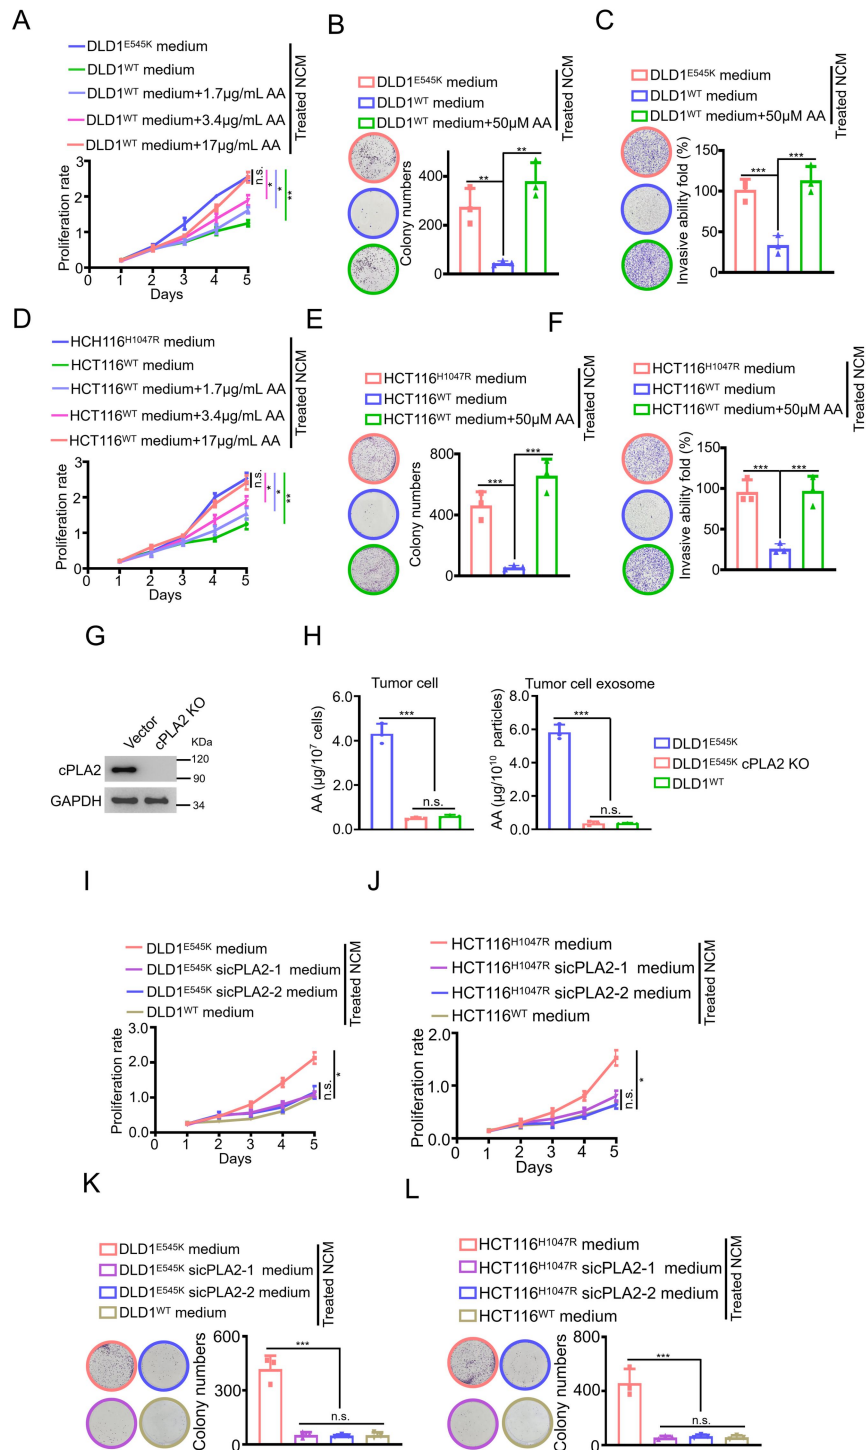

**Supplemental Figure 15: Exosome-mediated AA serves as the key mediator responsible for transmitting PIK3CA mutant signals (related to Fig. 3).**

(A-F) Cell viability was assessed in NCM460 cells treated with media from PIK3CA mutant or isogenic WT cells, or media from PIK3CA WT cells supplemented with exogenous AA. A-F: data are represented as means  $\pm$  SEM; n = 3 biological replicates.

(G) Western blotting confirmation of cPLA2 knock-out cells.

(H) Quantitative abundance of AA in the indicated cells and exosome components was measured using LC-MS/MS method (means  $\pm$  SEM; n = 3 biological replicates).

(I-L) Cell viability and colony-forming ability of NCM460 cells treated with media from PIK3CA mutant cells, cPLA2 knock-down PIK3CA mutant cells, and PIK3CA WT cells were tested. I-L: data are represented as means  $\pm$  SEM; n = 3 biological replicates.

Statistical analyses, n.s., not significant; \*p < 0.05; \*\*\*p < 0.001. P-values in (A), (D), (I) and (J) were tested with two-way ANOVA. P-values in (B), (C), (E), (F), (H), (K) and (L) were calculated with two-tailed student's t-test.

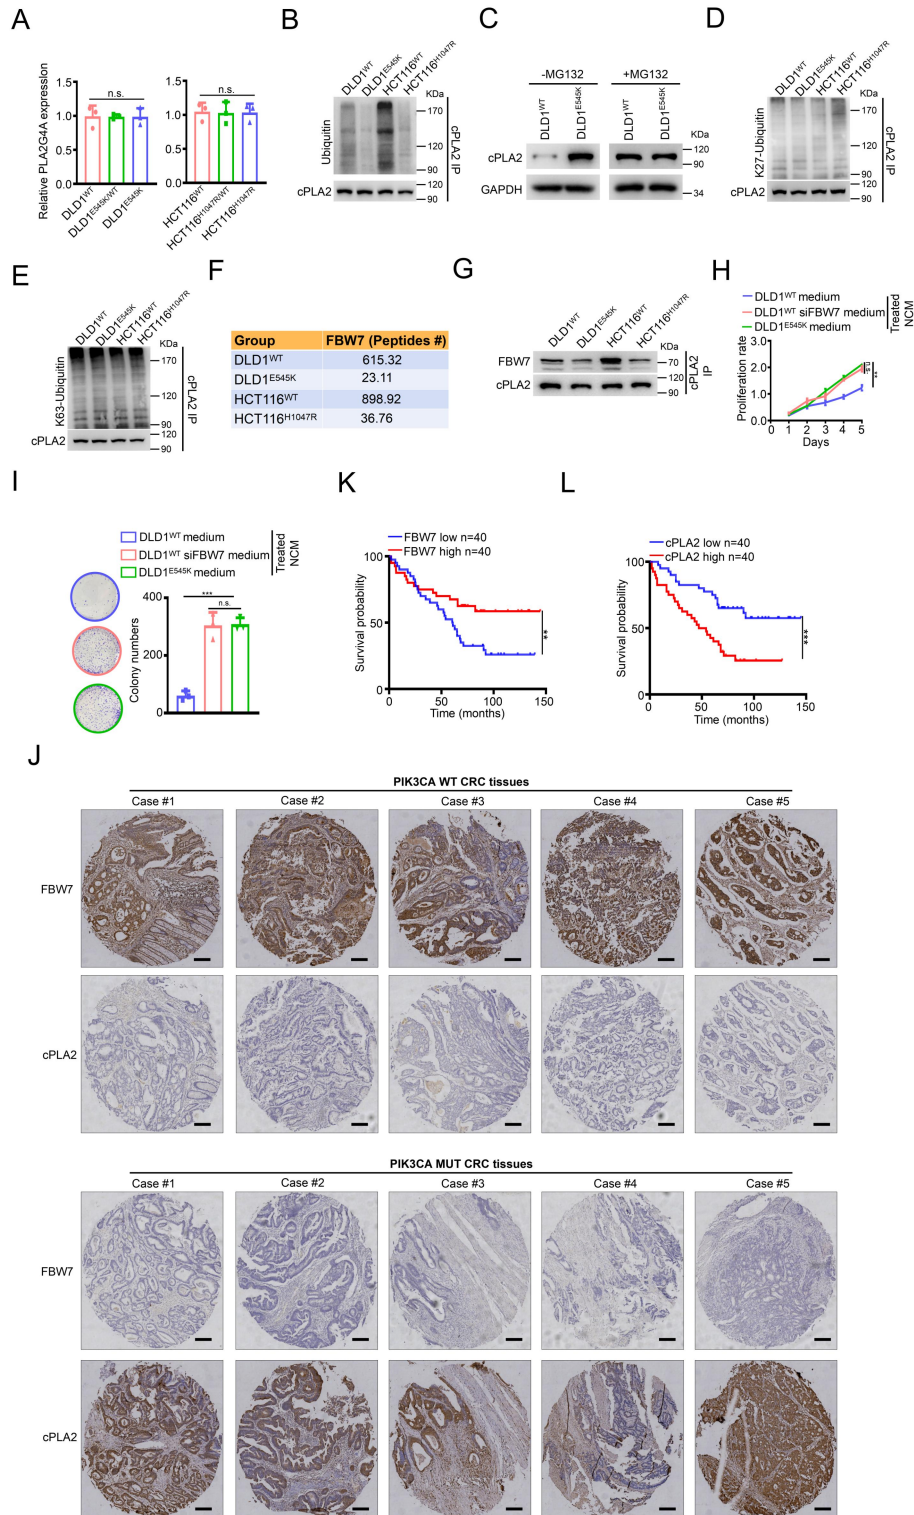

**Supplemental Figure 16: Clarification of FBW7 as the E3 ubiquitin ligase of cPLA2 protein (related to Fig. 4).**

(A) Expression levels of *PLA2G4A*/cPLA2 mRNA in PIK3CA mutant and isogenic WT tumor cells were measured using qPCR method (means  $\pm$  SEM; n = 3 technical replicates).



(B) Cell lysates were immunoprecipitated using cPLA2 antibody in PIK3CA mutant and isogenic WT cells, followed by blotting with anti-ubiquitin to assess cPLA2 ubiquitination.

(C) DLD1<sup>WT</sup> cell was treated with 50  $\mu$ M MG132 for 6h and then blotted with cPLA2 antibody.

(D and E) Cell lysates were immunoprecipitated using cPLA2 antibody in PIK3CA mutant and isogenic WT cells, followed by blotting with anti-K27-linked ubiquitin (D), or anti-K63-linked ubiquitin (E) antibody to assess cPLA2 ubiquitination.

(F) Analysis of differential peptides of FBW7 immunoprecipitated by cPLA2 antibody between PIK3CA mutant and isogenic WT cells using mass spectrometry.

(G) Evaluation and comparison of the interactions between cPLA2 and FBW7 in PIK3CA mutant and isogenic WT cells.

(H and I) *In-vitro* function including cell viability (H, means  $\pm$  SEM, n = 3 biological replicates) and colony-forming capacity (I, means  $\pm$  SEM, n = 3 biological replicates) of NCM460 cells treated with media derived from DLD1<sup>WT</sup> cells, DLD1<sup>WT</sup> FBW7 knockdown cells, and DLD1<sup>E545K</sup> cells was assayed.

(J) Representative IHC images of FBW7 and cPLA2 expression in PIK3CA WT (n = 67) and mutant (n = 13) CRC tissue microarray; original magnification: 40 $\times$ . Scale bar = 50  $\mu$ m.

(K and L) Kaplan-Meier analyses of overall survival probability of patients with tumors expressing high levels of FBW7 (or cPLA2) vs. low levels of FBW7 (or cPLA2).

Statistical analyses, n.s., not significant; \*\*p < 0.01; \*\*\*p < 0.001. P-values in (A) were calculated with two-tailed student's t-test. P-values in (H) and (I) were tested with two-way ANOVA.

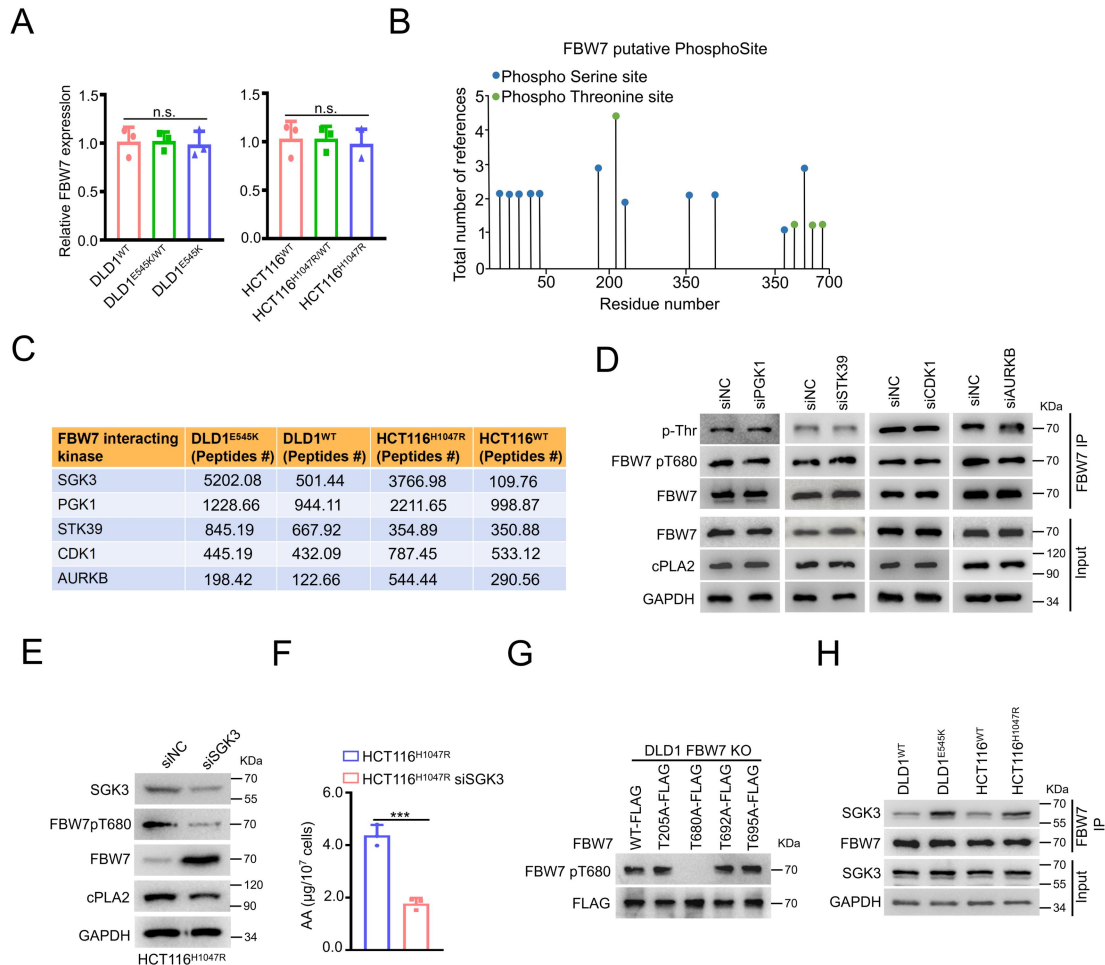

**Supplemental Figure 17: Exploration of the upstream kinase of FBW7 T680 (related to Fig. 4).**

(A) Measurement of FBW7 mRNA levels in PIK3CA mutant and isogenic WT cells using qPCR (means  $\pm$  SEM; n = 3 technical replicates).

(B) Identification of potential phosphorylation modification sites of FBW7 obtained from the PhosphoSitePlus knowledgebase (<http://www.phosphosite.org/>).

(C) Analysis of differential peptides of kinases, including SGK3, PGK1, STK39, CDK1 and AURKB immunoprecipitated by anti-FBW7 antibody between PIK3CA mutant and isogenic WT cells using mass spectrometry.

(D) Scrambled siRNA (NC) or siRNAs against PGK1, STK39, CDK1 or AURKB were transfected into DLD1 parental cells for 72 h. Cell lysates were immunoprecipitated using FBW7 antibody and then blotted with the indicated antibodies.

(E and F) Scrambled siRNA (NC) or siRNAs against SGK3 were transfected into

HCT116<sup>H1047R</sup> cells for 72 h. Cell lysates were blotted with the indicated antibodies (E); quantitative abundance of AA in those cells measured using LC-MS/MS method (F, means  $\pm$  SEM, n = 3 biological replicates).

(G) FLAG-tagged FBW7 WT or mutant constructs including T205A, T680A, T692A and T695A, were transfected into FBW7 KO DLD1 parental cell clones. Cell lysates were blotted with the FBW7 pT680 antibody.

(H) Evaluation and comparison of the interactions between FBW7 and SGK3 in PIK3CA mutant and isogenic WT tumor cells.

Statistical analyses, n.s., not significant. P-values in (A) and (F) were calculated with two-tailed student's t-test.

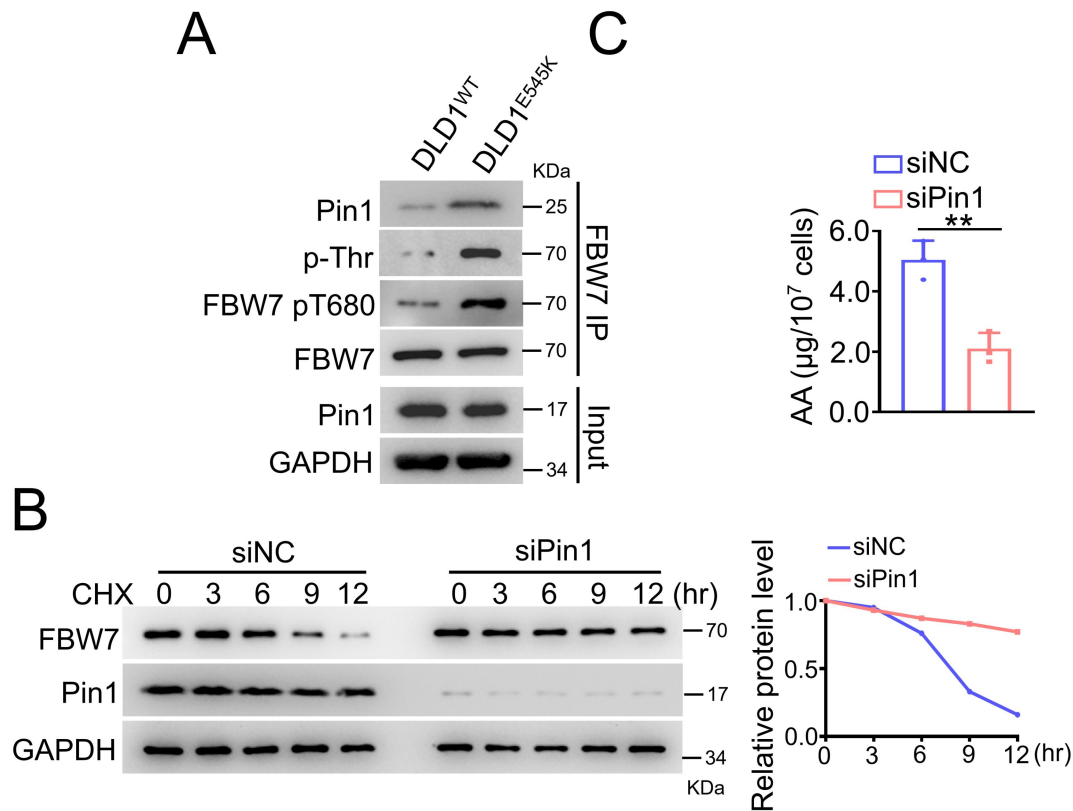

**Supplemental Figure 18: Impact of PIK3CA mutation on FBW7 protein stability through the regulation of FBW7-Pin1 interaction (related to Fig. 4).**

(A) Cell lysates of DLD1<sup>WT</sup> and DLD1<sup>E545K</sup> were immunoprecipitated with FBW7 antibody, then blotted with the indicated antibodies.

(B) DLD1<sup>E545K</sup> cells were transfected with scrambled siRNA (NC) or siRNAs against Pin1. Cells were treated with 50 μM cycloheximide (CHX) for the indicated times. Cell lysates were blotted with FBW7 antibody. Western blots are shown in the left panel. Quantification of FBW7 protein levels using ImageJ is shown in the right panel.

(C) Quantitative abundance of AA in DLD1<sup>E545K</sup> cells treated with scrambled siRNA (NC) or siRNAs against Pin1 was assayed using LC-MS/MS method (means ± SEM; n = 3 biological replicates).

Statistical analyses, \*\*p < 0.01. P-values in (A) were calculated with two-tailed student's t-test.

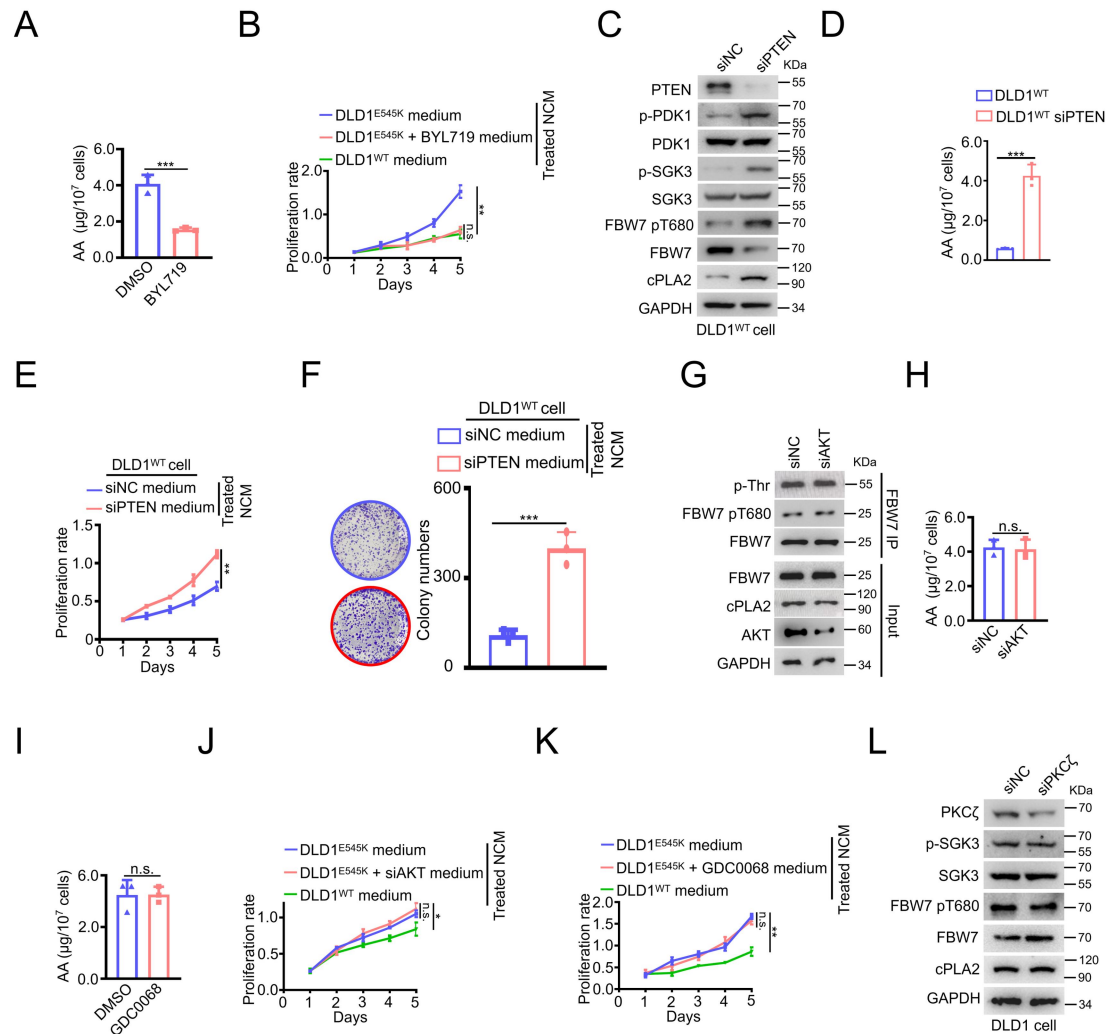

**Supplemental Figure 19: PI3K-mediated FBW7 phosphorylation is independent of canonical AKT activity (related to Fig. 4).**

(A) Quantitative abundance of AA in DLD1<sup>E545K</sup> cells treated with DMSO or BYL719 measured using LC-MS/MS method. DLD1<sup>E545K</sup> cells were treated with DMSO or 20  $\mu\text{M}$  BYL719 for 48 h, and then subjected to targeted LC-MS/MS analysis (means  $\pm$  SEM; n = 3 biological replicates).

(B) Cell viability of NCM460 cells treated with media from DLD1<sup>E545K</sup> cells, BYL719-treated DLD1<sup>E545K</sup> cells, and DLD1<sup>WT</sup> cells was assayed. First, medium from DLD1<sup>E545K</sup> cells, DLD1<sup>E545K</sup> cells pre-treated with 20  $\mu\text{M}$  BYL719 for 48 h, and DLD1<sup>WT</sup> cells were obtained. Then NCM460 cells were treated with the aforesaid media and subjected to cell viability detection (means  $\pm$  SEM; n = 3 biological replicates).

(C and D) Scrambled siRNA (NC) or siRNAs against PTEN were transfected into DLD1 WT cells for 72 h. Cell lysates were blotted with the indicated antibodies (C); quantitative abundance of AA in those cells measured using LC-MS/MS method (D, means  $\pm$  SEM, n = 3 biological replicates).

(E and F) *In-vitro* function including cell viability (E, means  $\pm$  SEM, n = 3 biological replicates) and colony-forming capacity (F, means  $\pm$  SEM, n = 3 biological replicates) of NCM460 cells treated with medium derived from DLD1 WT cells and DLD1WT FBW7 knockdown cells was assayed.

(G) DLD1<sup>E545K</sup> cells were transfected with scrambled siRNA (siNC) or siRNAs against AKT for 72 h. Cell lysates were immunoprecipitated with FBW7 antibody, then blotted with the indicated antibodies.

(H and I) Quantitative abundance of AA in DLD1<sup>E545K</sup> cells treated with AKT siRNAs (H, means  $\pm$  SEM, n = 3 biological replicates) or AKT inhibitor GDC0068 (I, means  $\pm$  SEM, n = 3 biological replicates) was measured using LC-MS/MS method. DLD1<sup>E545K</sup> cells were transfected with siRNAs against AKT for 72 h, or treated with 5  $\mu$ M GDC0068 inhibitor for 48 h. Then, DLD1<sup>E545K</sup> cells were obtained and subjected to targeted metabolic analysis.

(J and K) Cell viability of NCM460 cells treated with media from DLD1<sup>E545K</sup> cells, AKT siRNA (J, means  $\pm$  SEM, n = 3) or AKT inhibitor GDC0068 (K, means  $\pm$  SEM, n = 3) treated DLD1<sup>E545K</sup> cells, and DLD1<sup>WT</sup> cells was tested. First, media from DLD1<sup>E545K</sup> cells, DLD1<sup>E545K</sup> cells pre-treated with AKT siRNAs for 72 h, DLD1<sup>E545K</sup> cells pre-treated with 5  $\mu$ M GDC0068 inhibitor for 48 h, and DLD1<sup>WT</sup> cells were obtained. Then NCM460 cells were treated with the aforesaid media and subjected to cell viability detection.

(L) Scrambled siRNA (NC) or siRNAs against PKC $\zeta$  were transfected into DLD1 parental cells for 72 h. Cell lysates were blotted with the indicated antibodies.

Statistical analyses, n.s., not significant; \* p < 0.05; \*\* p < 0.01; \*\*\* p < 0.001. P-values in (A), (D), (F), (H) and (I) were calculated with two-tailed student's t-test. P-values in (B), (E), (G) and (K) were calculated with two-way ANOVA test.

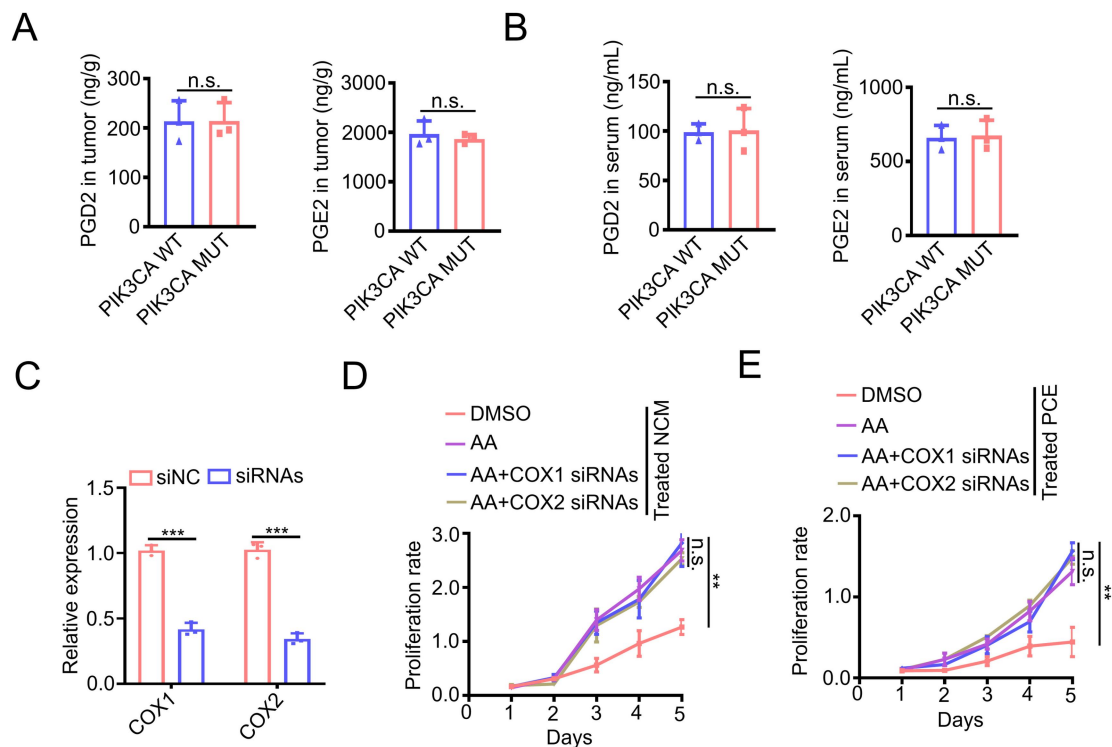

**Supplemental Figure 20: Malignant phenotype of colon epithelial cells induced by AA is independent of its downstream products PGD2 and PGE2 (related to Fig. 5).**

(A and B) Quantitative abundance of PGD2 and PGE2 in tumor tissues (A, means  $\pm$  SEM, n = 3 biological replicates) and sera (B, means  $\pm$  SEM, n = 3 biological replicates) from PIK3CA WT or mutant CRC patients was measured using LC-MS/MS method.

(C) The knock-down efficiency of COX1 and COX2 genes were evaluated using qPCR assay (means  $\pm$  SEM, n = 3 technical replicates).

(D and E) Cell viability of NCM460 (D, means  $\pm$  SEM, n = 3 biological replicates) and PCE cells (E, means  $\pm$  SEM, n = 3 biological replicates) treated with DMSO, 10  $\mu$ M AA, 10  $\mu$ M AA plus COX1 siRNA, or 10  $\mu$ M AA plus COX2 siRNA was assayed.

Statistical analyses, n.s., not significant; \*\*p < 0.01. P-values in (A) and (B) were calculated with two-tailed student's t-test. P-values in (C) and (D) were calculated with two-way ANOVA test.

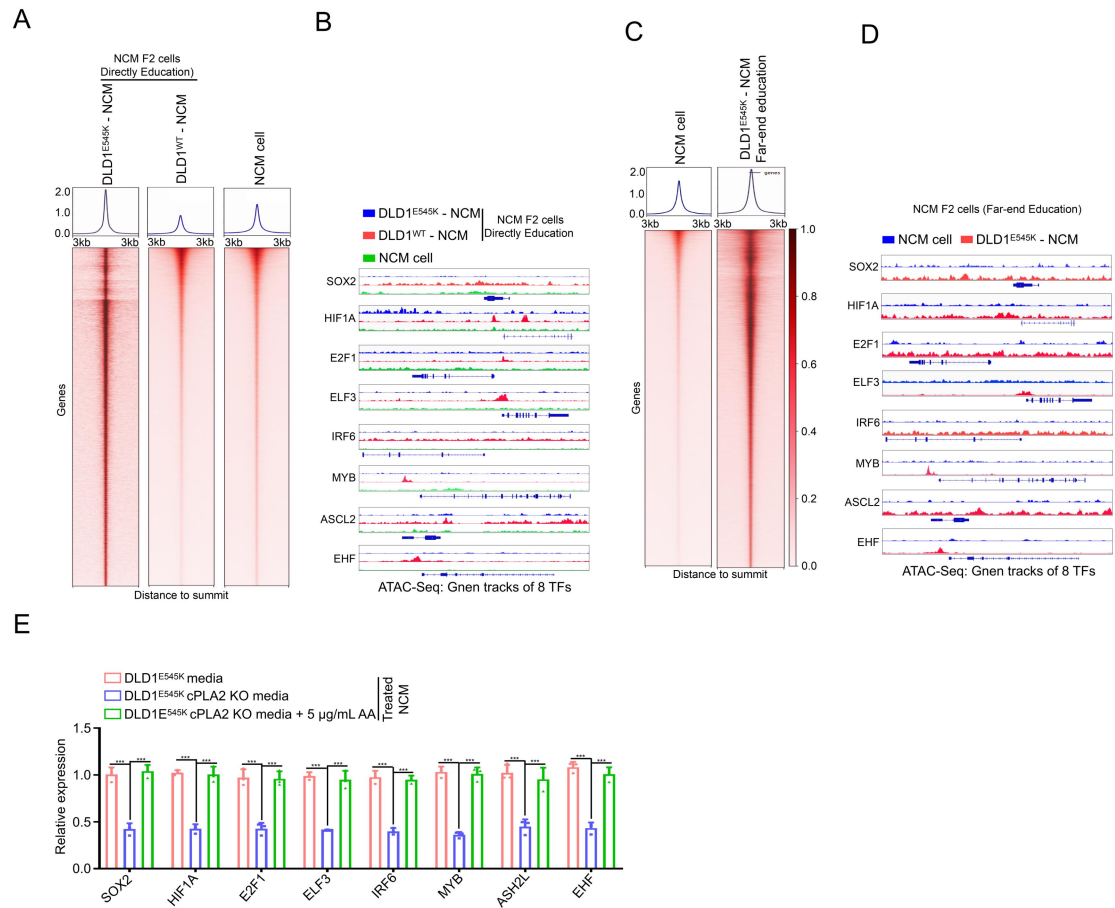

**Supplemental Figure 21: Supplementary results demonstrating the impact of AA on chromatin accessibility via H3K4me3 (related to Fig. 5).**

(A-D) Heatmap showing clustering of ATAC-seq data on the indicated cells from the Direct Education Model and the Far-end Education Model (A and C). Gene tracks of the 8 TFs locus with corresponding ATAC-Seq coverage files (B and D).

(E) qRT-PCR analyses of the expression of 8 TFs were performed in cell lines described above. Cell viability was assessed in NCM460 cells treated with media from DLD1<sup>E545K</sup> cells, cPLA2 KO DLD1<sup>E545K</sup> clones, and 5 µg/mL AA-treated cPLA2 KO DLD1<sup>E545K</sup> clones (means  $\pm$  SEM, n = 3 technical replicates).



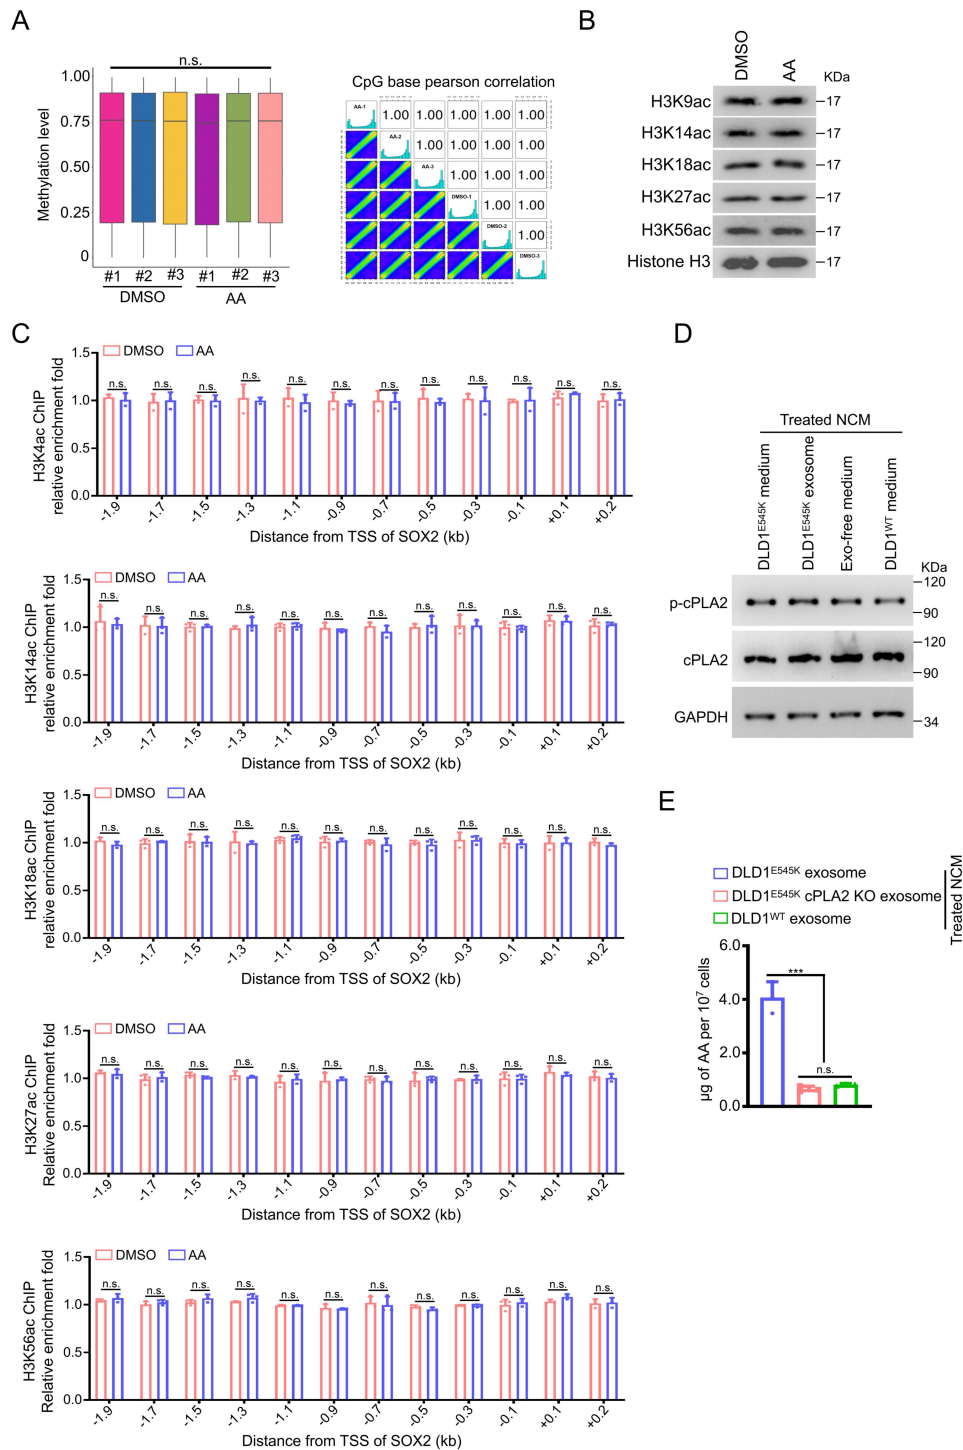

**Supplemental Figure 22: AA has no significant impact on DNA methylation, histone acetylation, and cPLA2 activity in recipient NCM460 cells (related to Fig. 5).**

(A) Epigenome-wide methylation profiling using Illumina Infinium MethylationEPIC BeadChip. Histogram displaying the methylation levels of NCM460 cells treated with DMSO or AA (left). Pearson's correlation analysis of the methylation levels of each

sample, with a larger coefficient indicating a higher similarity in methylation levels between the two samples (right).

(B) Immunoblot analysis of lysates from NCM460 cells treated with DMSO or AA, probed with the indicated antibodies.

(C) ChIP-PCR assays were performed in NCM460 cells treated with DMSO or AA using an anti-H3K9ac, H3K14ac, H3K18ac, H3K27ac, or H3K56ac antibodies and analyzed by quantitative PCR. Genomic DNA fragments covering +0.2 kb ~ -2.0 kb regions surrounding the transcription start site (TSS) of SOX2 were chosen (means  $\pm$  SEM, n = 3 technical replicates).

(D) Evaluation of phosphorylation and total protein level of cPLA2 in NCM460 cells treated with the indicated media.

(E) Quantitative abundance of AA in NCM460 cells treated with conditioned media from the indicated cells were measured using LC-MS/MS method (means  $\pm$  SEM, n = 3 biological replicates).

Statistical analyses, n.s., not significant; \*\*\*p < 0.001. P-values in (A, left) and (O) were calculated with two-tailed student's t-test. P-values in (A, right) were tested with spearman rank-correlation analysis.

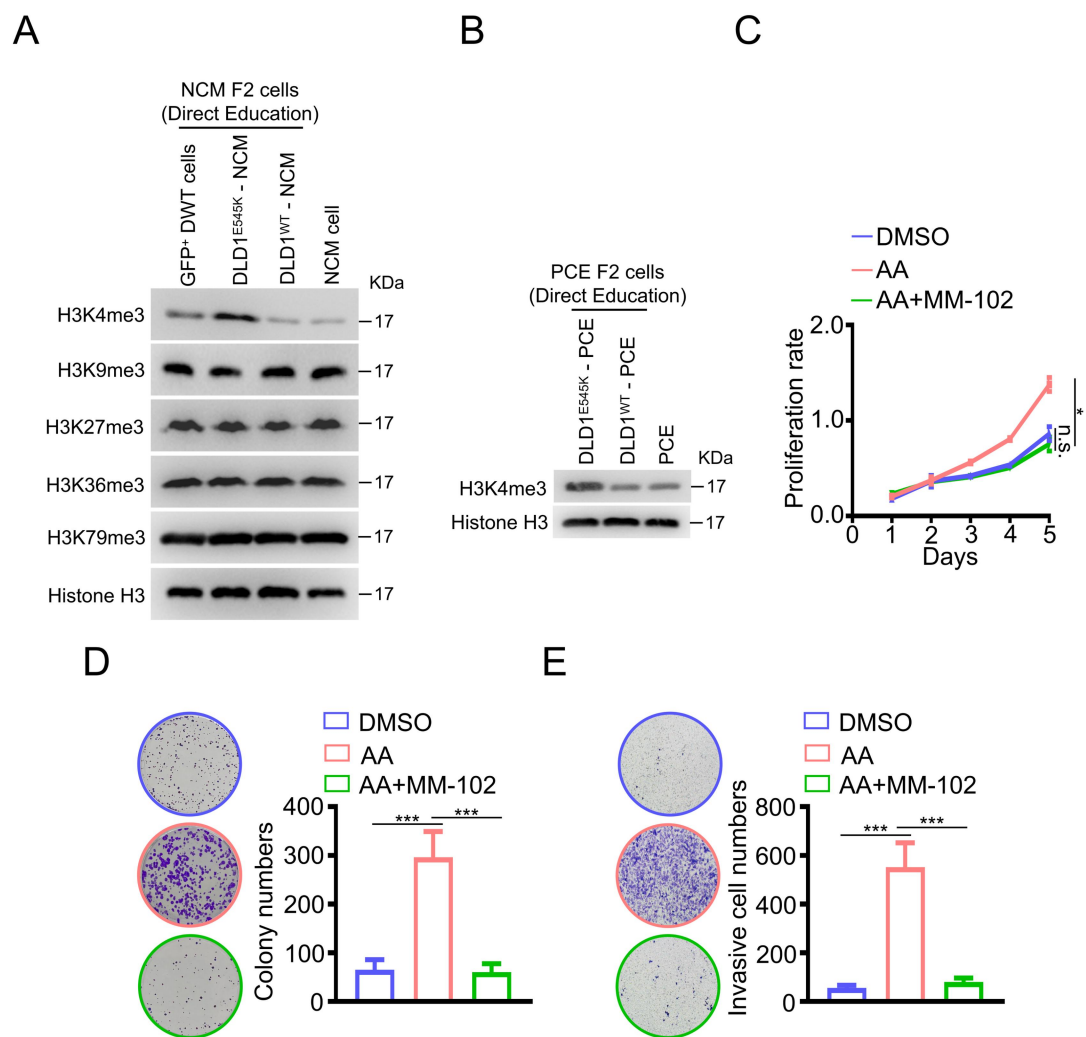

**Supplemental Figure 23: Methytransferase inhibitor MM-102 reverses AA-mediated cell proliferation, colony formation, and cell invasion in NCM460 cells (related to Fig. 5).**

(A and B) Immunoblot analysis of lysates from NCM460 F2 cells and PCE F2 cells obtained from the Direct Education Model, probed with the indicated antibodies.

(C-E) *In-vitro* function including cell viability (C, means  $\pm$  SEM, n = 3 biological replicates), colony forming efficiency (D, means  $\pm$  SEM, n = 3 biological replicates), and cell invasive ability (E, means  $\pm$  SEM, n = 3 biological replicates) in NCM460 cells treated with DMSO, 10  $\mu$ M AA, or 10  $\mu$ M AA plus 50  $\mu$ M MM-102 was assayed. The treatment time was 48 h.

Statistical analyses, n.s., not significant; \*p < 0.05; \*\*\*p < 0.001. P-values in (C) were tested with with two-way ANOVA test. P-values in (D) and (E) were calculated with two-tailed student's t-test.

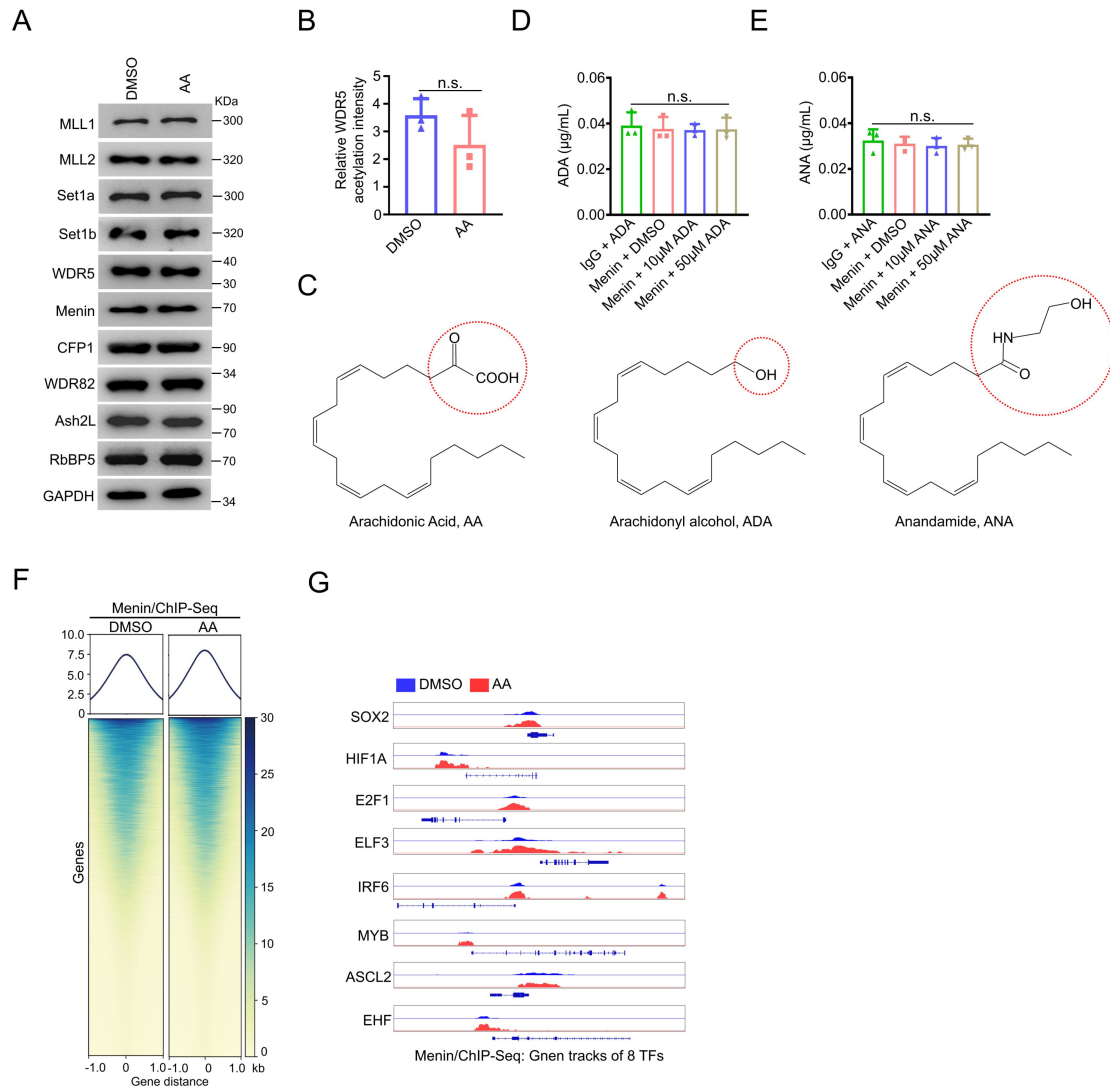

**Supplemental Figure 24: AA does not impact the expression and acetylation level of Compass complex subunits; AA analogues (ADA and ANA) do not physiologically interact with Menin (related to Fig. 6).**

(A) Immunoblot analysis of lysates from NCM460 cells treated with DMSO or AA, probed with the indicated antibodies.

(B) Measurement of acetylation levels of subunit proteins from the Compass complex. Detectable acetylation modifications were observed only in the WDR5 regulatory subunit protein, with no significant differences in the AA (10 µM for 48 h) treatment group compared to control (means  $\pm$  SEM, n = 3 biological replicates).

(C) Chemical formulas of AA and its analogues with substituted carboxyl groups (ADA) or ethanolamine groups (ANA).

(D and E) Purified 6 × His-Menin proteins were incubated with varying amounts of

ADA or ANA. Immunoprecipitation assay was performed using anti-Menin antibody, and the immunocomplex was quantitatively assessed for ADA (D, means  $\pm$  SEM, n = 3 biological replicates) or ANA (E, means  $\pm$  SEM, n = 3 biological replicates) using LC-MS-based trace-level quantitation of metabolites.

(F) ChIP-seq analysis of Menin in NCM460 cells treated with DMSO or AA. NCM460 cells were treated with DMSO or 10  $\mu$ M AA for 48 h. Then, cells were fixed using formaldehyde and subjected to ChIP-sequencing.

(G) Gene tracks of the 8 TFs locus with corresponding ChIP-seq coverage files using Menin antibody.

Statistical analyses, n.s., not significant. P-values in (B), (D) and (E) were calculated with two-tailed student's t-test.

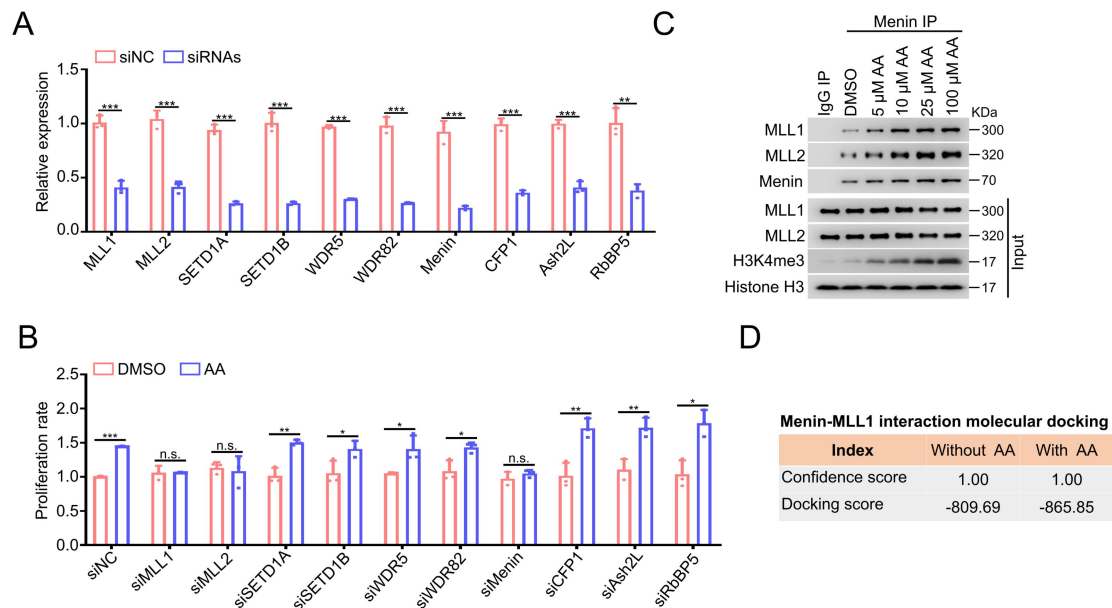

**Supplemental Figure 25: AA enhances the interaction between Menin and MLL1/2 (related to Fig. 6).**

(A) The knock-down efficiency of MLL1, MLL2, SET1A, SET1B, RbBP5, WDR82, CFP1, Menin, WDR5, and Ash2L genes were evaluated using qPCR assay (means  $\pm$  SEM, n = 3 technical replicates).

(B) NCM460 cells were transfected with scrambled siRNA (NC) or siRNAs against Compass complex subunits including MLL1, MLL2, SET1A, SET1B, RbBP5, WDR82, CFP1, Menin, WDR5, and Ash2L. Subsequently, cells were treated with DMSO or AA, and cell viability was assayed (means  $\pm$  SEM, n = 3 biological replicates).

(C) PCE cells were treated with varying amounts of AA. Cells were lysed, immunoprecipitated with anti-Menin antibody, and blotted with the indicated antibodies.

(D) Docking scores of the interaction between Menin and MLL1 with or without the participation of AA.

Statistical analyses, n.s., not significant; \* p < 0.05; \*\* p < 0.01; \*\*\* p < 0.001. P-values in (A) and (B) were calculated with two-tailed student's t-test.

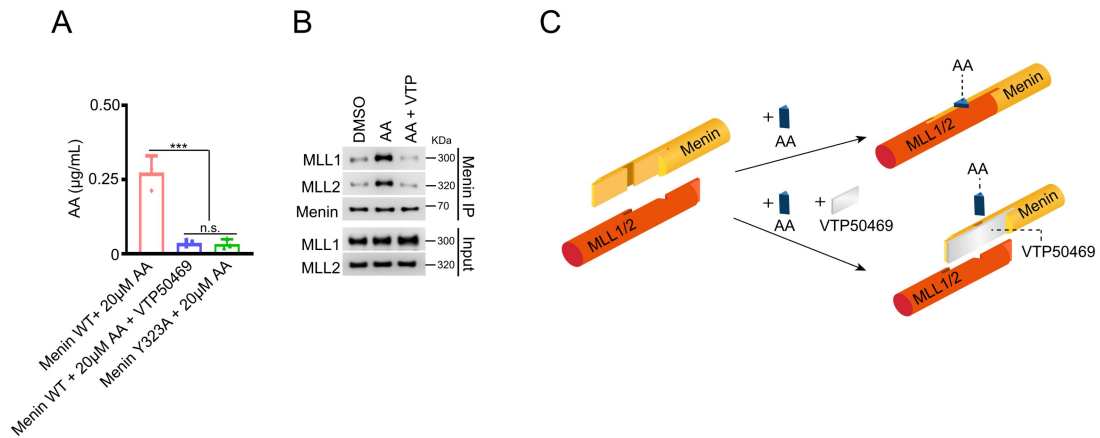

**Supplemental Figure 26: VTP50469 blocks the interaction of Menin and MLL1/2 induced by AA (related to Fig. 7).**

(A) Incubation of 1 µg purified 6 × His-Menin WT or Y323A mutant proteins with 10 µM AA or 100 nM VTP50469 was conducted at 37 °C for 6h. Then, immunoprecipitation was performed using anti-Menin antibody. Metabolites in the immunocomplex were extracted using methanol. Quantitative abundance of AA was measured using a LC-MS-based trace-level metabolite detection method (means ± SEM, n = 3 biological replicates).

(B) NCM460 cells treated with DMSO, 10 µM AA, or 10 µM AA plus 100 nM VTP50469 for 48 h. Then, the cells were lysed, immunoprecipitated with an anti-Menin antibody, and blotted with the indicated antibodies.

(C) Schematic diagram illustrating a model in which VTP50469 weakens the interaction between Menin and MLL1 triggered by AA.

Statistical analyses, n.s., not significant; \*\*\*p < 0.001. P-values in (A) were calculated with two-tailed student's t-test.

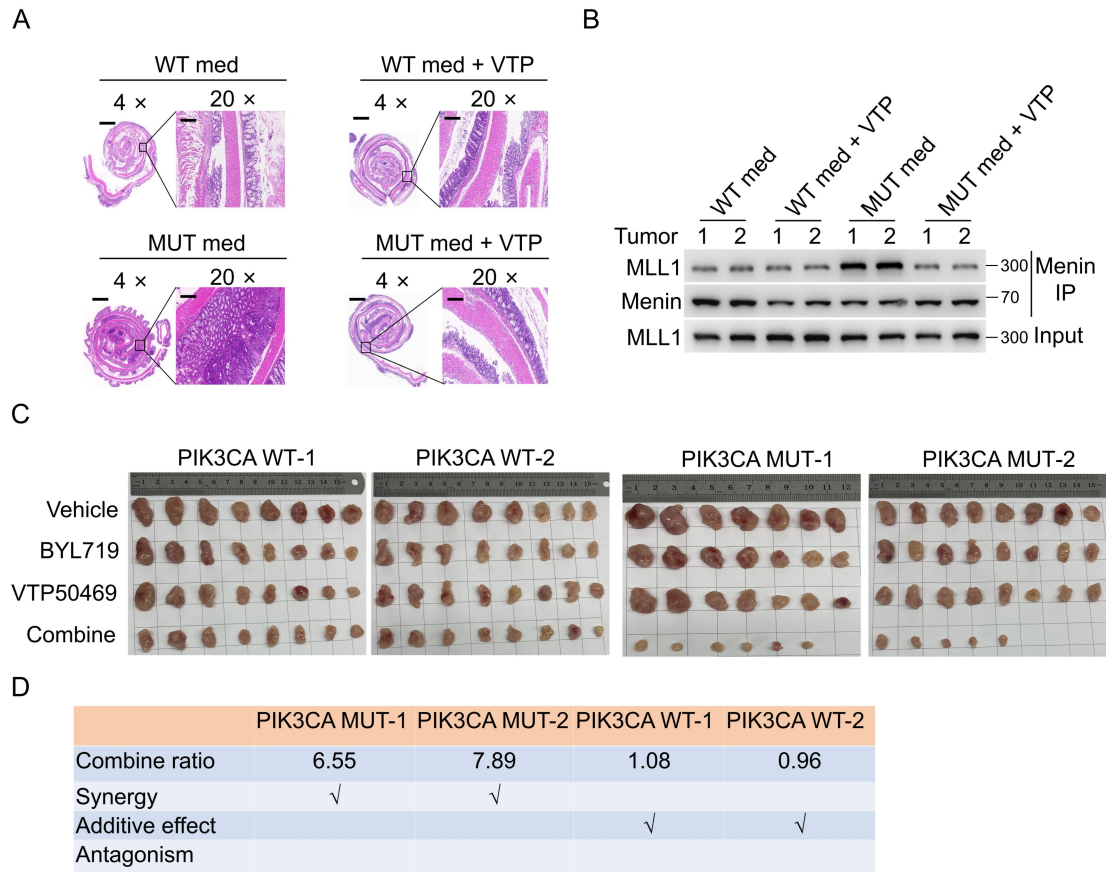

**Supplemental Figure 27: Supplementary results confirming the tumor repression induced by the combination of VTP50469 and Alpelisib (related to Fig. 7).**

(A) Representative H&E images of colon Swiss rolls from the AOM/DSS-Induced orthotopic tumor model shown in Figure 7A. 4×: scale bar = 1000 μm; 20×: scale bar = 20 μm.

(B) Lysates of AOM/DSS-induced orthotopic tumors were immunoprecipitated with an anti-Menin antibody and blotted with the indicated antibodies.

(C) Photographs of tumors from CRC PDX models receiving drug treatment shown in Figure 7F and G.

(D) Synergistic evaluation of the drug combination on various CRC models shown in Figure 7F and G.
